# Supplementary material
Source: publisher figshare collection journal article supplement (https://acs.figshare.com/ndownloader/files/4186660)
Supplement: Supplementary file 1 [file 4186660]

data_global
_audit_creation_date                    2012-01-07
_audit_creation_method            SHELXL-97
_publ_contact_author_name         'Dr Ken Tanaka'
_publ_contact_author_address
;
Department of Applied Chemistry
Graduate School of Engineering
Tokyo University of Agriculture and Technology
Koganei
Tokyo 184-8588
Japan
;
_publ_contact_author_email     'tanaka-k@cc.tuat.ac.jp'
_publ_contact_author_fax       '+81-42-388-7037'
_publ_contact_author_phone     '+81-42-388-7037'

loop_
    _publ_author_name
    _publ_author_address
    'Ishida, Mana'
;
    Department of Applied Chemistry
    Graduate School of Engineering
    Tokyo University of Agriculture and Technology
    Koganei
    Tokyo 184-8588
    Japan
;
    'Sawada, Yayoi'
;
    Department of Applied Chemistry
    Graduate School of Engineering
    Tokyo University of Agriculture and Technology
    Koganei
    Tokyo 184-8588
    Japan
;
    'Furumi, Seiichi'
;
    Applied Photonic Materials Group
    National Institute for Materials Science (NIMS)
    Tsukuba
    Ibaraki 305-0047
    Japan
;
    'Takai, Atsuro'
;
    Organic Materials Group
    National Institute for Materials Science (NIMS)
    Tsukuba
    Ibaraki 305-0047
    Japan
;
    'Takeuchi, Masayuki'
;
    Organic Materials Group
    National Institute for Materials Science (NIMS)
    Tsukuba
    Ibaraki 305-0047
    Japan
;
    'Noguchi, Keiichi'
;
    Instrumentation Analysis Center
    Tokyo University of Agriculture and Technology
    Koganei
    Tokyo 184-8588
    Japan
;
    'Tanaka, Ken'
;
    Department of Applied Chemistry
    Graduate School of Engineering
    Tokyo University of Agriculture and Technology
    Koganei
    Tokyo 184-8588
    Japan
;

data_I
_chemical_name_systematic
;
 ?
;
_chemical_name_common             ?
_chemical_melting_point           ?
_chemical_formula_moiety         'C43 H30 Cl2 O'
_chemical_formula_sum            'C43 H30 Cl2 O'
_chemical_formula_weight          633.57
_chemical_absolute_configuration 'ad'

loop_
 _atom_type_symbol
 _atom_type_description
 _atom_type_scat_dispersion_real
 _atom_type_scat_dispersion_imag
 _atom_type_scat_source
 'C'  'C'   0.0181   0.0091
 'International Tables Vol C Tables 4.2.6.8 and 6.1.1.4'
 'O'  'O'   0.0492   0.0322
 'International Tables Vol C Tables 4.2.6.8 and 6.1.1.4'
 'Cl'  'Cl'   0.3639   0.7018
 'International Tables Vol C Tables 4.2.6.8 and 6.1.1.4'
 'H'  'H'   0.0000   0.0000
 'International Tables Vol C Tables 4.2.6.8 and 6.1.1.4'
 
_symmetry_cell_setting                  triclinic
_symmetry_space_group_name_H-M         'P 1'
_symmetry_space_group_name_Hall        'P 1'
_symmetry_Int_Tables_number             1
loop_
_symmetry_equiv_pos_site_id
_symmetry_equiv_pos_as_xyz
1   '+X,+Y,+Z'
 
_cell_length_a                    15.3425(3)
_cell_length_b                    15.3670(3)
_cell_length_c                    23.8764(4)
_cell_angle_alpha                 72.5438(7)
_cell_angle_beta                  81.2377(7)
_cell_angle_gamma                 60.1809(8)
_cell_volume                      4659.02(15)
_cell_formula_units_Z             6
_cell_measurement_temperature     193(2)
_cell_measurement_reflns_used           78018
_cell_measurement_theta_min             3.32
_cell_measurement_theta_max             68.23
 
_exptl_crystal_description              block
_exptl_crystal_colour                   brown
_exptl_crystal_size_max           0.50
_exptl_crystal_size_mid           0.50
_exptl_crystal_size_min           0.30
_exptl_crystal_density_meas       ?
_exptl_crystal_density_diffrn     1.355
_exptl_crystal_density_method     'not measured'
_exptl_crystal_F_000              1980
_exptl_absorpt_coefficient_mu           2.147
_exptl_absorpt_correction_type          numerical
_exptl_absorpt_process_details         'NUMABS (Rigaku, 1999)'
_exptl_absorpt_correction_T_min         0.320
_exptl_absorpt_correction_T_max         0.525
 
_exptl_special_details
;
 ?
;
 
_diffrn_ambient_temperature       193(2)
_diffrn_radiation_wavelength      1.54187
_diffrn_radiation_type            CuK\a
_diffrn_radiation_source          'rotating anode'
_diffrn_radiation_monochromator   graphite
_diffrn_measurement_device_type        'Rigaku R-AXIS RAPID'
_diffrn_measurement_method              \w
_diffrn_detector_area_resol_mean        10.000
_diffrn_reflns_number             84378
_diffrn_reflns_av_R_equivalents   0.0335
_diffrn_reflns_av_sigmaI/netI     0.0416
_diffrn_reflns_limit_h_min        -18
_diffrn_reflns_limit_h_max        17
_diffrn_reflns_limit_k_min        -18
_diffrn_reflns_limit_k_max        18
_diffrn_reflns_limit_l_min        -28
_diffrn_reflns_limit_l_max        28
_diffrn_reflns_theta_min          3.32
_diffrn_reflns_theta_max          68.24
_reflns_number_total              30539
_reflns_number_gt                 26121
_reflns_threshold_expression      >2sigma(I)
 
_computing_data_collection             'RAPID AUTO (Rigaku, 2004)'
_computing_cell_refinement             'RAPID AUTO'
_computing_data_reduction              'RAPID AUTO'
_computing_structure_solution          'Il Milione (Burla, et al., 2007)'
_computing_structure_refinement   'SHELXL-97 (Sheldrick, 1997)'
_computing_molecular_graphics     ?
_computing_publication_material   'SHELXL-97 (Sheldrick, 1997)'
 
_refine_special_details
;
 Refinement of F^2^ against ALL reflections.  The weighted R-factor wR and
 goodness of fit S are based on F^2^, conventional R-factors R are based
 on F, with F set to zero for negative F^2^. The threshold expression of
 F^2^ > 2sigma(F^2^) is used only for calculating R-factors(gt) etc. and is
 not relevant to the choice of reflections for refinement.  R-factors based
 on F^2^ are statistically about twice as large as those based on F, and R-
 factors based on ALL data will be even larger.
;
 
_refine_ls_structure_factor_coef  Fsqd
_refine_ls_matrix_type            fullcycle
_refine_ls_weighting_scheme       calc
_refine_ls_weighting_details
 'calc w=1/[\s^2^(Fo^2^)+(0.0633P)^2^+0.2559P] where P=(Fo^2^+2Fc^2^)/3'
_atom_sites_solution_primary      direct
_atom_sites_solution_secondary    difmap
_atom_sites_solution_hydrogens    geom
_refine_ls_hydrogen_treatment     constr
_refine_ls_extinction_method      none
_refine_ls_extinction_coef        ?
_refine_ls_abs_structure_details
 'Flack H D (1983), Acta Cryst. A39, 876-881  13768 Friedel Pairs'
_refine_ls_abs_structure_Flack    0.01(7)
_refine_ls_number_reflns          30539
_refine_ls_number_parameters      2638
_refine_ls_number_restraints      241
_refine_ls_R_factor_all           0.0499
_refine_ls_R_factor_gt            0.0414
_refine_ls_wR_factor_ref          0.1162
_refine_ls_wR_factor_gt           0.1020
_refine_ls_goodness_of_fit_ref    1.121
_refine_ls_restrained_S_all       12.363
_refine_ls_shift/su_max           0.004
_refine_ls_shift/su_mean          0.000
 
loop_
 _atom_site_label
 _atom_site_type_symbol
 _atom_site_fract_x
 _atom_site_fract_y
 _atom_site_fract_z
 _atom_site_U_iso_or_equiv
 _atom_site_adp_type
 _atom_site_occupancy
 _atom_site_symmetry_multiplicity
 _atom_site_calc_flag
 _atom_site_refinement_flags
 _atom_site_disorder_assembly
 _atom_site_disorder_group
Cl1A_1 Cl -0.3666(11) 1.0198(11) 0.9809(7) 0.103(5) Uani 0.90 1 d PDU A 1
Cl1B_1 Cl -0.388(6) 0.942(10) 1.012(6) 0.09(3) Uani 0.10 1 d PDU A 2
Cl2_1 Cl 0.3434(8) 0.9643(8) 1.0196(5) 0.071(3) Uani 1 1 d . . .
O1_1 O -0.0007(17) 0.8924(17) 1.0253(11) 0.053(6) Uani 1 1 d . . .
C1_1 C 0.062(2) 0.820(2) 1.0055(13) 0.040(7) Uani 1 1 d . . .
C2_1 C 0.059(2) 0.724(2) 1.0087(12) 0.037(7) Uani 1 1 d . . .
C3_1 C 0.151(2) 0.656(2) 0.9867(12) 0.034(6) Uani 1 1 d . . .
C4_1 C 0.203(2) 0.718(2) 0.9561(12) 0.035(6) Uani 1 1 d . . .
C5_1 C 0.156(2) 0.810(2) 0.9745(12) 0.036(6) Uani 1 1 d . . .
C6_1 C -0.014(2) 0.694(2) 1.0345(13) 0.039(7) Uani 1 1 d . . .
C7_1 C 0.007(2) 0.595(2) 1.0367(13) 0.041(7) Uani 1 1 d . . .
H7_1 H -0.0434 0.5751 1.0503 0.049 Uiso 1 1 calc R . .
C8_1 C 0.100(2) 0.521(2) 1.0197(12) 0.036(6) Uani 1 1 d . . .
C9_1 C 0.118(2) 0.419(2) 1.0197(12) 0.037(7) Uani 1 1 d . . .
C10_1 C 0.042(3) 0.390(2) 1.0344(14) 0.045(7) Uani 1 1 d . . .
H10_1 H -0.0204 0.4345 1.0495 0.054 Uiso 1 1 calc R . .
C11_1 C 0.056(3) 0.298(3) 1.0271(16) 0.055(9) Uani 1 1 d . . .
H11_1 H 0.0042 0.2790 1.0380 0.066 Uiso 1 1 calc R . .
C12_1 C 0.145(3) 0.234(3) 1.0041(17) 0.058(9) Uani 1 1 d . . .
H12_1 H 0.1530 0.1728 0.9967 0.070 Uiso 1 1 calc R . .
C13_1 C 0.222(3) 0.257(3) 0.9920(16) 0.054(9) Uani 1 1 d . . .
H13_1 H 0.2842 0.2101 0.9779 0.064 Uiso 1 1 calc R . .
C14_1 C 0.211(2) 0.349(2) 1.0002(13) 0.041(7) Uani 1 1 d . . .
C15_1 C 0.296(2) 0.369(2) 0.9927(12) 0.039(7) Uani 1 1 d . . .
C16_1 C 0.395(3) 0.292(2) 0.9872(15) 0.048(8) Uani 1 1 d . . .
H16_1 H 0.4068 0.2264 0.9845 0.058 Uiso 1 1 calc R . .
C17_1 C 0.475(3) 0.309(2) 0.9857(15) 0.052(8) Uani 1 1 d . . .
H17_1 H 0.5410 0.2558 0.9809 0.063 Uiso 1 1 calc R . .
C18_1 C 0.460(3) 0.402(2) 0.9912(14) 0.047(8) Uani 1 1 d . . .
H18_1 H 0.5163 0.4127 0.9915 0.057 Uiso 1 1 calc R . .
C19_1 C 0.365(2) 0.479(2) 0.9963(13) 0.039(7) Uani 1 1 d . . .
H19_1 H 0.3550 0.5430 1.0009 0.047 Uiso 1 1 calc R . .
C20_1 C 0.280(2) 0.467(2) 0.9950(12) 0.035(6) Uani 1 1 d . . .
C21_1 C 0.178(2) 0.549(2) 0.9994(11) 0.033(6) Uani 1 1 d . . .
C22_1 C 0.192(2) 0.882(2) 0.9587(13) 0.042(7) Uani 1 1 d . . .
C23_1 C 0.280(2) 0.856(2) 0.9267(13) 0.041(7) Uani 1 1 d . . .
H23_1 H 0.3104 0.8989 0.9197 0.049 Uiso 1 1 calc R . .
C24_1 C 0.325(2) 0.769(2) 0.9038(12) 0.036(6) Uani 1 1 d . . .
C25_1 C 0.422(2) 0.742(2) 0.8720(12) 0.037(6) Uani 1 1 d . . .
C26_1 C 0.479(3) 0.790(3) 0.8721(15) 0.047(8) Uani 1 1 d . . .
H26_1 H 0.4531 0.8440 0.8910 0.057 Uiso 1 1 calc R . .
C27_1 C 0.572(3) 0.761(3) 0.8458(16) 0.052(9) Uani 1 1 d . . .
H27_1 H 0.6085 0.7950 0.8459 0.063 Uiso 1 1 calc R . .
C28_1 C 0.611(3) 0.679(3) 0.8186(15) 0.053(8) Uani 1 1 d . . .
H28_1 H 0.6757 0.6571 0.8010 0.063 Uiso 1 1 calc R . .
C29_1 C 0.556(2) 0.632(2) 0.8172(14) 0.043(7) Uani 1 1 d . . .
H29_1 H 0.5834 0.5773 0.7982 0.052 Uiso 1 1 calc R . .
C30_1 C 0.460(2) 0.662(2) 0.8432(12) 0.036(6) Uani 1 1 d . . .
C31_1 C 0.400(2) 0.613(2) 0.8411(12) 0.033(6) Uani 1 1 d . . .
C32_1 C 0.427(2) 0.546(2) 0.8045(13) 0.040(7) Uani 1 1 d . . .
H32_1 H 0.4862 0.5318 0.7810 0.048 Uiso 1 1 calc R . .
C33_1 C 0.370(2) 0.501(2) 0.8024(14) 0.045(7) Uani 1 1 d . . .
H33_1 H 0.3912 0.4536 0.7792 0.054 Uiso 1 1 calc R . .
C34_1 C 0.281(2) 0.526(2) 0.8340(13) 0.040(7) Uani 1 1 d . . .
H34_1 H 0.2402 0.4965 0.8317 0.048 Uiso 1 1 calc R . .
C35_1 C 0.252(2) 0.593(2) 0.8684(12) 0.036(6) Uani 1 1 d . . .
H35_1 H 0.1893 0.6118 0.8884 0.044 Uiso 1 1 calc R . .
C36_1 C 0.312(2) 0.634(2) 0.8752(11) 0.034(6) Uani 1 1 d . . .
C37_1 C 0.280(2) 0.704(2) 0.9131(12) 0.034(6) Uani 1 1 d . . .
C38_1 C -0.111(2) 0.767(3) 1.0575(14) 0.047(8) Uani 1 1 d . . .
H38A_1 H -0.1408 0.7264 1.0850 0.057 Uiso 1 1 calc R . .
H38B_1 H -0.0975 0.8041 1.0798 0.057 Uiso 1 1 calc R . .
C39_1 C -0.185(3) 0.845(3) 1.0105(16) 0.061(10) Uani 1 1 d DU A .
H39A_1 H -0.2086 0.8099 0.9930 0.074 Uiso 1 1 calc R . .
H39B_1 H -0.1519 0.8778 0.9792 0.074 Uiso 1 1 calc R . .
C40_1 C -0.275(3) 0.929(3) 1.0335(18) 0.076(12) Uani 1 1 d DU . .
H40A_1 H -0.2513 0.9664 1.0496 0.091 Uiso 0.90 1 calc PR A 1
H40B_1 H -0.3057 0.8962 1.0662 0.091 Uiso 0.90 1 calc PR A 1
H40C_1 H -0.2741 0.9963 1.0175 0.091 Uiso 0.10 1 calc PR A 2
H40D_1 H -0.2716 0.9113 1.0769 0.091 Uiso 0.10 1 calc PR A 2
C41_1 C 0.144(3) 0.979(2) 0.9803(14) 0.046(8) Uani 1 1 d . . .
H41A_1 H 0.0700 1.0145 0.9748 0.055 Uiso 1 1 calc R . .
H41B_1 H 0.1686 1.0275 0.9564 0.055 Uiso 1 1 calc R . .
C42_1 C 0.166(3) 0.955(3) 1.0449(15) 0.054(9) Uani 1 1 d . . .
H42A_1 H 0.1346 1.0218 1.0561 0.064 Uiso 1 1 calc R . .
H42B_1 H 0.1339 0.9140 1.0687 0.064 Uiso 1 1 calc R . .
C43_1 C 0.276(3) 0.897(3) 1.0603(17) 0.065(10) Uani 1 1 d . . .
H43A_1 H 0.3066 0.8282 1.0525 0.077 Uiso 1 1 calc R . .
H43B_1 H 0.2827 0.8864 1.1027 0.077 Uiso 1 1 calc R . .
Cl1_2 Cl -0.2407(7) 0.8513(6) 0.8613(4) 0.053(2) Uani 1 1 d . . .
Cl2A_2 Cl 0.4544(11) 0.0705(14) 0.8913(7) 0.104(5) Uani 0.85 1 d PDU B 1
Cl2B_2 Cl 0.416(9) 0.037(5) 0.836(4) 0.13(4) Uani 0.15 1 d PDU C 2
O1_2 O 0.1005(17) 0.4559(17) 0.8314(10) 0.051(6) Uani 1 1 d . . .
C1_2 C 0.043(2) 0.421(2) 0.8526(13) 0.038(7) Uani 1 1 d . . .
C2_2 C -0.048(2) 0.467(2) 0.8887(12) 0.037(7) Uani 1 1 d . . .
C3_2 C -0.091(2) 0.401(2) 0.9061(11) 0.032(6) Uani 1 1 d . . .
C4_2 C -0.039(2) 0.320(2) 0.8711(12) 0.033(6) Uani 1 1 d . . .
C5_2 C 0.048(2) 0.326(2) 0.8458(13) 0.038(7) Uani 1 1 d . . .
C6_2 C -0.083(2) 0.556(2) 0.9080(12) 0.037(6) Uani 1 1 d . . .
C7_2 C -0.167(2) 0.580(2) 0.9435(12) 0.037(7) Uani 1 1 d . . .
H7_2 H -0.1967 0.6435 0.9547 0.045 Uiso 1 1 calc R . .
C8_2 C -0.211(2) 0.516(2) 0.9637(12) 0.036(6) Uani 1 1 d . . .
C9_2 C -0.306(2) 0.550(2) 0.9972(12) 0.037(6) Uani 1 1 d . . .
C10_2 C -0.363(3) 0.653(2) 1.0006(14) 0.047(8) Uani 1 1 d . . .
H10_2 H -0.3382 0.7006 0.9832 0.057 Uiso 1 1 calc R . .
C11_2 C -0.455(3) 0.687(3) 1.0286(15) 0.054(9) Uani 1 1 d . . .
H11_2 H -0.4925 0.7569 1.0304 0.065 Uiso 1 1 calc R . .
C12_2 C -0.492(3) 0.618(3) 1.0544(15) 0.054(9) Uani 1 1 d . . .
H12_2 H -0.5557 0.6410 1.0734 0.065 Uiso 1 1 calc R . .
C13_2 C -0.437(2) 0.515(3) 1.0524(13) 0.047(8) Uani 1 1 d . . .
H13_2 H -0.4620 0.4686 1.0708 0.056 Uiso 1 1 calc R . .
C14_2 C -0.343(2) 0.479(2) 1.0237(12) 0.038(7) Uani 1 1 d . . .
C15_2 C -0.282(2) 0.370(2) 1.0222(12) 0.036(6) Uani 1 1 d . . .
C16_2 C -0.308(2) 0.294(2) 1.0557(13) 0.043(7) Uani 1 1 d . . .
H16_2 H -0.3666 0.3134 1.0796 0.051 Uiso 1 1 calc R . .
C17_2 C -0.251(3) 0.192(2) 1.0548(14) 0.048(8) Uani 1 1 d . . .
H17_2 H -0.2720 0.1428 1.0764 0.057 Uiso 1 1 calc R . .
C18_2 C -0.163(2) 0.162(2) 1.0223(13) 0.041(7) Uani 1 1 d . . .
H18_2 H -0.1226 0.0909 1.0224 0.050 Uiso 1 1 calc R . .
C19_2 C -0.135(2) 0.233(2) 0.9902(12) 0.035(6) Uani 1 1 d . . .
H19_2 H -0.0722 0.2107 0.9698 0.043 Uiso 1 1 calc R . .
C20_2 C -0.195(2) 0.340(2) 0.9867(11) 0.033(6) Uani 1 1 d . . .
C21_2 C -0.165(2) 0.417(2) 0.9507(12) 0.033(6) Uani 1 1 d . . .
C22_2 C 0.119(2) 0.257(2) 0.8146(13) 0.040(7) Uani 1 1 d . . .
C23_2 C 0.104(2) 0.177(2) 0.8122(13) 0.044(7) Uani 1 1 d . . .
H23_2 H 0.1549 0.1236 0.7954 0.053 Uiso 1 1 calc R . .
C24_2 C 0.017(2) 0.170(2) 0.8332(12) 0.039(7) Uani 1 1 d . . .
C25_2 C 0.006(3) 0.081(2) 0.8340(12) 0.042(7) Uani 1 1 d . . .
C26_2 C 0.088(3) -0.008(2) 0.8202(14) 0.051(9) Uani 1 1 d . . .
H26_2 H 0.1486 -0.0073 0.8061 0.062 Uiso 1 1 calc R . .
C27_2 C 0.080(3) -0.097(3) 0.8270(15) 0.058(10) Uani 1 1 d . . .
H27_2 H 0.1360 -0.1561 0.8172 0.070 Uiso 1 1 calc R . .
C28_2 C -0.006(3) -0.100(3) 0.8478(17) 0.065(11) Uani 1 1 d . . .
H28_2 H -0.0098 -0.1625 0.8542 0.078 Uiso 1 1 calc R . .
C29_2 C -0.088(3) -0.014(3) 0.8594(16) 0.060(10) Uani 1 1 d . . .
H29_2 H -0.1488 -0.0162 0.8729 0.073 Uiso 1 1 calc R . .
C30_2 C -0.085(3) 0.078(2) 0.8519(13) 0.046(8) Uani 1 1 d . . .
C31_2 C -0.173(3) 0.173(2) 0.8613(13) 0.044(7) Uani 1 1 d . . .
C32_2 C -0.270(3) 0.183(3) 0.8655(15) 0.056(9) Uani 1 1 d . . .
H32_2 H -0.2780 0.1268 0.8638 0.067 Uiso 1 1 calc R . .
C33_2 C -0.353(3) 0.274(3) 0.8719(16) 0.058(9) Uani 1 1 d . . .
H33_2 H -0.4181 0.2783 0.8756 0.070 Uiso 1 1 calc R . .
C34_2 C -0.343(3) 0.358(3) 0.8731(14) 0.049(8) Uani 1 1 d . . .
H34_2 H -0.4009 0.4201 0.8777 0.059 Uiso 1 1 calc R . .
C35_2 C -0.250(2) 0.350(2) 0.8674(12) 0.040(7) Uani 1 1 d . . .
H35_2 H -0.2438 0.4097 0.8661 0.048 Uiso 1 1 calc R . .
C36_2 C -0.162(2) 0.258(2) 0.8636(12) 0.037(7) Uani 1 1 d . . .
C37_2 C -0.063(2) 0.251(2) 0.8577(12) 0.034(6) Uani 1 1 d . . .
C38_2 C -0.037(3) 0.628(2) 0.8871(13) 0.041(7) Uani 1 1 d . . .
H38A_2 H 0.0367 0.5865 0.8879 0.050 Uiso 1 1 calc R . .
H38B_2 H -0.0576 0.6730 0.9141 0.050 Uiso 1 1 calc R . .
C39_2 C -0.071(2) 0.696(2) 0.8250(13) 0.042(7) Uani 1 1 d . . .
H39A_2 H -0.0419 0.7439 0.8140 0.050 Uiso 1 1 calc R . .
H39B_2 H -0.0437 0.6513 0.7977 0.050 Uiso 1 1 calc R . .
C40_2 C -0.183(3) 0.760(2) 0.8169(13) 0.045(8) Uani 1 1 d . . .
H40A_2 H -0.2123 0.7129 0.8271 0.054 Uiso 1 1 calc R . .
H40B_2 H -0.1973 0.7984 0.7751 0.054 Uiso 1 1 calc R . .
C41_2 C 0.210(2) 0.267(3) 0.7854(14) 0.050(8) Uani 1 1 d DU . .
H41A_2 H 0.1869 0.3399 0.7631 0.060 Uiso 1 1 calc R . .
H41B_2 H 0.2377 0.2239 0.7569 0.060 Uiso 1 1 calc R . .
C42_2 C 0.293(3) 0.234(3) 0.8270(16) 0.060(9) Uani 1 1 d DU . .
H42A_2 H 0.3406 0.2587 0.8062 0.072 Uiso 0.85 1 calc PR D 1
H42B_2 H 0.2640 0.2649 0.8606 0.072 Uiso 0.85 1 calc PR D 1
H42C_2 H 0.3534 0.2296 0.8037 0.072 Uiso 0.15 1 calc PR D 2
H42D_2 H 0.2713 0.2877 0.8483 0.072 Uiso 0.15 1 calc PR D 2
C43A_2 C 0.347(3) 0.116(4) 0.849(2) 0.073(15) Uani 0.85 1 d PDU B 1
H43A_2 H 0.3686 0.0857 0.8146 0.087 Uiso 0.85 1 calc PR B 1
H43B_2 H 0.3006 0.0925 0.8728 0.087 Uiso 0.85 1 calc PR B 1
C43B_2 C 0.320(12) 0.130(9) 0.871(5) 0.09(10) Uani 0.15 1 d PDU C 2
H43C_2 H 0.2605 0.1181 0.8802 0.106 Uiso 0.15 1 calc PR C 2
H43D_2 H 0.3446 0.1263 0.9081 0.106 Uiso 0.15 1 calc PR C 2
Cl1A_3 Cl 0.1011(18) -0.4550(15) 0.6677(10) 0.075(6) Uani 0.50 1 d PDU E 1
Cl1B_3 Cl 0.273(7) -0.536(5) 0.646(3) 0.11(4) Uani 0.20 1 d PDU . 2
Cl1C_3 Cl 0.209(7) -0.512(5) 0.633(3) 0.09(3) Uani 0.15 1 d PDU F 3
Cl1D_3 Cl 0.276(6) -0.527(5) 0.679(4) 0.09(3) Uani 0.15 1 d PDU G 4
Cl2_3 Cl -0.5233(7) 0.1973(7) 0.6961(5) 0.066(2) Uani 1 1 d . . .
O1_3 O -0.1089(18) -0.1439(16) 0.6871(10) 0.051(6) Uani 1 1 d . . .
C1_3 C -0.084(2) -0.076(2) 0.6688(12) 0.038(7) Uani 1 1 d . . .
C2_3 C 0.015(2) -0.084(2) 0.6712(12) 0.035(6) Uani 1 1 d . . .
C3_3 C 0.006(2) 0.016(2) 0.6520(11) 0.032(6) Uani 1 1 d . . .
C4_3 C -0.096(2) 0.087(2) 0.6224(12) 0.033(6) Uani 1 1 d . . .
C5_3 C -0.153(2) 0.036(2) 0.6403(12) 0.035(6) Uani 1 1 d . . .
C6_3 C 0.105(2) -0.173(2) 0.6928(13) 0.039(7) Uani 1 1 d . . .
C7_3 C 0.185(2) -0.157(2) 0.6962(13) 0.041(7) Uani 1 1 d . . .
H7_3 H 0.2486 -0.2162 0.7070 0.050 Uiso 1 1 calc R . .
C8_3 C 0.175(2) -0.058(2) 0.6844(12) 0.036(6) Uani 1 1 d . . .
C9_3 C 0.262(2) -0.045(2) 0.6887(12) 0.039(7) Uani 1 1 d . . .
C10_3 C 0.358(2) -0.131(3) 0.7066(14) 0.049(8) Uani 1 1 d . . .
H10_3 H 0.3643 -0.1988 0.7201 0.058 Uiso 1 1 calc R . .
C11_3 C 0.441(3) -0.119(3) 0.7047(17) 0.058(10) Uani 1 1 d . . .
H11_3 H 0.5048 -0.1779 0.7165 0.070 Uiso 1 1 calc R . .
C12_3 C 0.432(3) -0.021(3) 0.6856(19) 0.064(10) Uani 1 1 d . . .
H12_3 H 0.4904 -0.0132 0.6832 0.077 Uiso 1 1 calc R . .
C13_3 C 0.341(3) 0.065(3) 0.6701(17) 0.057(9) Uani 1 1 d . . .
H13_3 H 0.3363 0.1316 0.6577 0.069 Uiso 1 1 calc R . .
C14_3 C 0.253(2) 0.056(3) 0.6721(13) 0.042(7) Uani 1 1 d . . .
C15_3 C 0.154(2) 0.147(2) 0.6621(12) 0.039(7) Uani 1 1 d . . .
C16_3 C 0.139(3) 0.248(3) 0.6559(15) 0.049(8) Uani 1 1 d . . .
H16_3 H 0.1958 0.2582 0.6532 0.059 Uiso 1 1 calc R . .
C17_3 C 0.044(3) 0.331(2) 0.6538(15) 0.051(9) Uani 1 1 d . . .
H17_3 H 0.0362 0.3980 0.6486 0.062 Uiso 1 1 calc R . .
C18_3 C -0.039(3) 0.317(2) 0.6589(14) 0.047(8) Uani 1 1 d . . .
H18_3 H -0.1042 0.3743 0.6585 0.056 Uiso 1 1 calc R . .
C19_3 C -0.028(2) 0.220(2) 0.6647(12) 0.039(7) Uani 1 1 d . . .
H19_3 H -0.0852 0.2103 0.6695 0.047 Uiso 1 1 calc R . .
C20_3 C 0.069(2) 0.134(2) 0.6636(12) 0.035(6) Uani 1 1 d . . .
C21_3 C 0.081(2) 0.032(2) 0.6658(11) 0.033(6) Uani 1 1 d . . .
C22_3 C -0.255(2) 0.082(2) 0.6275(13) 0.038(7) Uani 1 1 d . . .
C23_3 C -0.299(2) 0.185(2) 0.5947(13) 0.038(7) Uani 1 1 d . . .
H23_3 H -0.3690 0.2214 0.5881 0.046 Uiso 1 1 calc R . .
C24_3 C -0.242(2) 0.236(2) 0.5711(12) 0.033(6) Uani 1 1 d . . .
C25_3 C -0.293(2) 0.347(2) 0.5375(12) 0.035(6) Uani 1 1 d . . .
C26_3 C -0.399(2) 0.405(2) 0.5355(13) 0.043(7) Uani 1 1 d . . .
H26_3 H -0.4378 0.3710 0.5541 0.052 Uiso 1 1 calc R . .
C27_3 C -0.447(3) 0.510(2) 0.5067(14) 0.050(8) Uani 1 1 d . . .
H27_3 H -0.5184 0.5477 0.5051 0.060 Uiso 1 1 calc R . .
C28_3 C -0.390(3) 0.559(2) 0.4802(14) 0.051(9) Uani 1 1 d . . .
H28_3 H -0.4231 0.6309 0.4611 0.061 Uiso 1 1 calc R . .
C29_3 C -0.288(3) 0.504(2) 0.4814(14) 0.046(8) Uani 1 1 d . . .
H29_3 H -0.2501 0.5391 0.4627 0.055 Uiso 1 1 calc R . .
C30_3 C -0.236(2) 0.397(2) 0.5098(11) 0.035(6) Uani 1 1 d . . .
C31_3 C -0.127(2) 0.337(2) 0.5091(11) 0.032(6) Uani 1 1 d . . .
C32_3 C -0.067(2) 0.380(2) 0.4746(12) 0.039(7) Uani 1 1 d . . .
H32_3 H -0.0995 0.4495 0.4516 0.046 Uiso 1 1 calc R . .
C33_3 C 0.036(2) 0.323(2) 0.4730(13) 0.041(7) Uani 1 1 d . . .
H33_3 H 0.0744 0.3551 0.4514 0.050 Uiso 1 1 calc R . .
C34_3 C 0.083(2) 0.218(2) 0.5037(12) 0.038(7) Uani 1 1 d . . .
H34_3 H 0.1540 0.1777 0.5019 0.046 Uiso 1 1 calc R . .
C35_3 C 0.026(2) 0.175(2) 0.5364(12) 0.035(6) Uani 1 1 d . . .
H35_3 H 0.0588 0.1024 0.5555 0.042 Uiso 1 1 calc R . .
C36_3 C -0.078(2) 0.232(2) 0.5429(11) 0.031(6) Uani 1 1 d . . .
C37_3 C -0.137(2) 0.185(2) 0.5799(11) 0.031(6) Uani 1 1 d . . .
C38_3 C 0.117(3) -0.281(2) 0.7100(15) 0.049(8) Uani 1 1 d DU . .
H38A_3 H 0.0521 -0.2765 0.7045 0.059 Uiso 0.50 1 calc PR H 1
H38B_3 H 0.1344 -0.3126 0.7521 0.059 Uiso 0.50 1 calc PR H 1
H38C_3 H 0.0521 -0.2765 0.7045 0.059 Uiso 0.20 1 calc PR H 2
H38D_3 H 0.1344 -0.3126 0.7521 0.059 Uiso 0.20 1 calc PR H 2
H38E_3 H 0.0568 -0.2802 0.7323 0.059 Uiso 0.15 1 calc PR H 3
H38F_3 H 0.1758 -0.3280 0.7362 0.059 Uiso 0.15 1 calc PR H 3
H38G_3 H 0.0568 -0.2802 0.7323 0.059 Uiso 0.15 1 calc PR H 4
H38H_3 H 0.1758 -0.3280 0.7362 0.059 Uiso 0.15 1 calc PR H 4
C39A_3 C 0.198(4) -0.351(3) 0.674(2) 0.047(13) Uani 0.50 1 d PDU E 1
H39A_3 H 0.1826 -0.3173 0.6320 0.056 Uiso 0.50 1 calc PR E 1
H39B_3 H 0.2634 -0.3594 0.6819 0.056 Uiso 0.50 1 calc PR E 1
C40A_3 C 0.204(4) -0.456(4) 0.689(2) 0.060(16) Uani 0.50 1 d PDU E 1
H40A_3 H 0.2118 -0.4856 0.7321 0.072 Uiso 0.50 1 calc PR E 1
H40B_3 H 0.2645 -0.5016 0.6703 0.072 Uiso 0.50 1 calc PR E 1
C39B_3 C 0.198(4) -0.351(3) 0.674(2) 0.047(13) Uani 0.20 1 d PD . 2
H39C_3 H 0.1826 -0.3173 0.6320 0.056 Uiso 0.20 1 calc PR . 2
H39D_3 H 0.2634 -0.3594 0.6819 0.056 Uiso 0.20 1 calc PR . 2
C40B_3 C 0.204(4) -0.456(4) 0.689(2) 0.060(16) Uani 0.20 1 d PD . 2
H40C_3 H 0.1343 -0.4447 0.6901 0.072 Uiso 0.20 1 calc PR . 2
H40D_3 H 0.2306 -0.4925 0.7295 0.072 Uiso 0.20 1 calc PR . 2
C39C_3 C 0.131(12) -0.323(6) 0.658(5) 0.10(6) Uani 0.15 1 d PDU F 3
H39E_3 H 0.1902 -0.3233 0.6344 0.117 Uiso 0.15 1 calc PR F 3
H39F_3 H 0.0710 -0.2796 0.6322 0.117 Uiso 0.15 1 calc PR F 3
C40C_3 C 0.147(8) -0.435(7) 0.682(6) 0.08(6) Uani 0.15 1 d PDU F 3
H40E_3 H 0.0804 -0.4323 0.6911 0.101 Uiso 0.15 1 calc PR F 3
H40F_3 H 0.1857 -0.4685 0.7184 0.101 Uiso 0.15 1 calc PR F 3
C39D_3 C 0.131(12) -0.323(6) 0.658(5) 0.10(6) Uani 0.15 1 d PD G 4
H39G_3 H 0.1902 -0.3233 0.6344 0.117 Uiso 0.15 1 calc PR G 4
H39H_3 H 0.0710 -0.2796 0.6322 0.117 Uiso 0.15 1 calc PR G 4
C40D_3 C 0.147(8) -0.435(7) 0.682(6) 0.08(6) Uani 0.15 1 d PD G 4
H40G_3 H 0.1074 -0.4463 0.6578 0.101 Uiso 0.15 1 calc PR G 4
H40H_3 H 0.1224 -0.4456 0.7226 0.101 Uiso 0.15 1 calc PR G 4
C41_3 C -0.316(2) 0.026(3) 0.6502(13) 0.043(7) Uani 1 1 d . . .
H41A_3 H -0.2788 -0.0441 0.6438 0.052 Uiso 1 1 calc R . .
H41B_3 H -0.3797 0.0647 0.6276 0.052 Uiso 1 1 calc R . .
C42_3 C -0.341(3) 0.017(2) 0.7158(14) 0.045(7) Uani 1 1 d . . .
H42A_3 H -0.3779 -0.0235 0.7286 0.054 Uiso 1 1 calc R . .
H42B_3 H -0.2777 -0.0223 0.7380 0.054 Uiso 1 1 calc R . .
C43_3 C -0.404(3) 0.119(3) 0.7320(16) 0.055(9) Uani 1 1 d . . .
H43A_3 H -0.3658 0.1582 0.7215 0.066 Uiso 1 1 calc R . .
H43B_3 H -0.4143 0.1044 0.7750 0.066 Uiso 1 1 calc R . .
Cl1_4 Cl -0.7256(8) 0.7050(8) 0.5047(5) 0.073(3) Uani 1 1 d . . .
Cl2A_4 Cl -0.772(3) 1.353(3) 0.5278(18) 0.082(11) Uani 0.30 1 d PDU I 1
Cl2B_4 Cl -0.694(7) 1.436(6) 0.551(4) 0.14(5) Uani 0.20 1 d PD . 2
Cl2C_4 Cl -0.666(4) 1.428(3) 0.515(3) 0.090(16) Uani 0.25 1 d PDU J 3
Cl2D_4 Cl -0.744(3) 1.411(3) 0.561(2) 0.074(16) Uani 0.25 1 d PDU K 4
O1_4 O -0.6574(17) 1.0490(17) 0.5102(11) 0.055(6) Uani 1 1 d . . .
C1_4 C -0.574(2) 0.979(2) 0.5293(13) 0.041(7) Uani 1 1 d . . .
C2_4 C -0.546(2) 0.869(2) 0.5579(13) 0.038(7) Uani 1 1 d . . .
C3_4 C -0.446(2) 0.816(2) 0.5763(12) 0.033(6) Uani 1 1 d . . .
C4_4 C -0.400(2) 0.886(2) 0.5468(12) 0.034(6) Uani 1 1 d . . .
C5_4 C -0.482(2) 0.987(2) 0.5272(12) 0.037(7) Uani 1 1 d . . .
C6_4 C -0.609(2) 0.824(2) 0.5712(13) 0.039(7) Uani 1 1 d . . .
C7_4 C -0.566(2) 0.721(2) 0.6031(13) 0.039(7) Uani 1 1 d . . .
H7_4 H -0.6039 0.6847 0.6089 0.047 Uiso 1 1 calc R . .
C8_4 C -0.470(2) 0.667(2) 0.6271(12) 0.035(6) Uani 1 1 d . . .
C9_4 C -0.426(2) 0.556(2) 0.6590(12) 0.035(6) Uani 1 1 d . . .
C10_4 C -0.475(3) 0.499(2) 0.6602(13) 0.043(7) Uani 1 1 d . . .
H10_4 H -0.5385 0.5330 0.6418 0.051 Uiso 1 1 calc R . .
C11_4 C -0.433(3) 0.394(2) 0.6872(14) 0.048(8) Uani 1 1 d . . .
H11_4 H -0.4665 0.3567 0.6868 0.058 Uiso 1 1 calc R . .
C12_4 C -0.340(3) 0.344(2) 0.7154(14) 0.051(8) Uani 1 1 d . . .
H12_4 H -0.3113 0.2719 0.7345 0.061 Uiso 1 1 calc R . .
C13_4 C -0.292(3) 0.398(2) 0.7154(13) 0.044(7) Uani 1 1 d . . .
H13_4 H -0.2286 0.3634 0.7346 0.052 Uiso 1 1 calc R . .
C14_4 C -0.333(2) 0.505(2) 0.6875(12) 0.035(6) Uani 1 1 d . . .
C15_4 C -0.283(2) 0.565(2) 0.6888(12) 0.033(6) Uani 1 1 d . . .
C16_4 C -0.197(2) 0.520(2) 0.7237(12) 0.038(7) Uani 1 1 d . . .
H16_4 H -0.1710 0.4501 0.7465 0.046 Uiso 1 1 calc R . .
C17_4 C -0.151(2) 0.576(2) 0.7251(12) 0.039(7) Uani 1 1 d . . .
H17_4 H -0.0907 0.5439 0.7468 0.047 Uiso 1 1 calc R . .
C18_4 C -0.192(2) 0.681(2) 0.6950(12) 0.037(6) Uani 1 1 d . . .
H18_4 H -0.1618 0.7203 0.6972 0.044 Uiso 1 1 calc R . .
C19_4 C -0.277(2) 0.726(2) 0.6623(12) 0.033(6) Uani 1 1 d . . .
H19_4 H -0.3068 0.7987 0.6436 0.040 Uiso 1 1 calc R . .
C20_4 C -0.321(2) 0.669(2) 0.6555(11) 0.031(6) Uani 1 1 d . . .
C21_4 C -0.410(2) 0.718(2) 0.6184(11) 0.032(6) Uani 1 1 d . . .
C22_4 C -0.467(2) 1.074(2) 0.5048(13) 0.041(7) Uani 1 1 d . . .
C23_4 C -0.370(3) 1.057(2) 0.5018(13) 0.044(8) Uani 1 1 d . . .
H23_4 H -0.3584 1.1158 0.4907 0.053 Uiso 1 1 calc R . .
C24_4 C -0.287(2) 0.958(2) 0.5146(12) 0.037(7) Uani 1 1 d . . .
C25_4 C -0.184(2) 0.943(2) 0.5111(12) 0.039(7) Uani 1 1 d . . .
C26_4 C -0.165(3) 1.027(3) 0.4947(14) 0.049(8) Uani 1 1 d . . .
H26_4 H -0.2189 1.0956 0.4813 0.059 Uiso 1 1 calc R . .
C27_4 C -0.070(3) 1.014(3) 0.4974(17) 0.061(10) Uani 1 1 d . . .
H27_4 H -0.0584 1.0718 0.4857 0.073 Uiso 1 1 calc R . .
C28_4 C 0.009(3) 0.915(3) 0.517(2) 0.070(11) Uani 1 1 d . . .
H28_4 H 0.0737 0.9058 0.5208 0.084 Uiso 1 1 calc R . .
C29_4 C -0.006(3) 0.830(3) 0.5319(17) 0.059(9) Uani 1 1 d . . .
H29_4 H 0.0493 0.7628 0.5451 0.071 Uiso 1 1 calc R . .
C30_4 C -0.102(2) 0.841(3) 0.5279(13) 0.044(7) Uani 1 1 d . . .
C31_4 C -0.117(2) 0.751(2) 0.5365(12) 0.039(7) Uani 1 1 d . . .
C32_4 C -0.036(3) 0.651(3) 0.5420(14) 0.050(8) Uani 1 1 d . . .
H32_4 H 0.0305 0.6398 0.5447 0.059 Uiso 1 1 calc R . .
C33_4 C -0.049(3) 0.568(3) 0.5434(16) 0.053(9) Uani 1 1 d . . .
H33_4 H 0.0075 0.5008 0.5474 0.063 Uiso 1 1 calc R . .
C34_4 C -0.145(3) 0.584(2) 0.5390(14) 0.048(8) Uani 1 1 d . . .
H34_4 H -0.1550 0.5279 0.5395 0.057 Uiso 1 1 calc R . .
C35_4 C -0.226(2) 0.681(2) 0.5340(12) 0.038(7) Uani 1 1 d . . .
H35_4 H -0.2911 0.6916 0.5294 0.046 Uiso 1 1 calc R . .
C36_4 C -0.215(2) 0.765(2) 0.5356(12) 0.035(6) Uani 1 1 d . . .
C37_4 C -0.302(2) 0.868(2) 0.5334(11) 0.032(6) Uani 1 1 d . . .
C38_4 C -0.715(2) 0.879(3) 0.5482(14) 0.046(8) Uani 1 1 d . . .
H38A_4 H -0.7503 0.9498 0.5543 0.055 Uiso 1 1 calc R . .
H38B_4 H -0.7511 0.8413 0.5709 0.055 Uiso 1 1 calc R . .
C39_4 C -0.718(3) 0.887(3) 0.4829(15) 0.050(8) Uani 1 1 d . . .
H39A_4 H -0.7885 0.9262 0.4702 0.061 Uiso 1 1 calc R . .
H39B_4 H -0.6842 0.9282 0.4604 0.061 Uiso 1 1 calc R . .
C40_4 C -0.669(3) 0.786(3) 0.4675(17) 0.059(9) Uani 1 1 d . . .
H40A_4 H -0.5966 0.7482 0.4779 0.070 Uiso 1 1 calc R . .
H40B_4 H -0.6732 0.7992 0.4245 0.070 Uiso 1 1 calc R . .
C41_4 C -0.554(3) 1.183(2) 0.4860(15) 0.053(9) Uani 1 1 d DU . .
H41A_4 H -0.5430 1.2155 0.4450 0.064 Uiso 0.30 1 calc PR L 1
H41B_4 H -0.6167 1.1783 0.4868 0.064 Uiso 0.30 1 calc PR L 1
H41C_4 H -0.5430 1.2155 0.4450 0.064 Uiso 0.20 1 calc PR L 2
H41D_4 H -0.6167 1.1783 0.4868 0.064 Uiso 0.20 1 calc PR L 2
H41E_4 H -0.5287 1.2297 0.4611 0.064 Uiso 0.25 1 calc PR L 3
H41F_4 H -0.6011 1.1821 0.4619 0.064 Uiso 0.25 1 calc PR L 3
H41G_4 H -0.5287 1.2297 0.4611 0.064 Uiso 0.25 1 calc PR L 4
H41H_4 H -0.6011 1.1821 0.4619 0.064 Uiso 0.25 1 calc PR L 4
C42A_4 C -0.569(5) 1.251(4) 0.524(3) 0.05(2) Uani 0.30 1 d PDU I 1
H42A_4 H -0.5088 1.2607 0.5210 0.059 Uiso 0.30 1 calc PR I 1
H42B_4 H -0.5757 1.2169 0.5656 0.059 Uiso 0.30 1 calc PR I 1
C43A_4 C -0.661(4) 1.356(5) 0.506(3) 0.06(2) Uani 0.30 1 d PDU I 1
H43A_4 H -0.6614 1.3823 0.4626 0.068 Uiso 0.30 1 calc PR I 1
H43B_4 H -0.6577 1.4057 0.5229 0.068 Uiso 0.30 1 calc PR I 1
C42B_4 C -0.569(5) 1.251(4) 0.524(3) 0.05(2) Uani 0.20 1 d PD . 2
H42C_4 H -0.5088 1.2607 0.5210 0.059 Uiso 0.20 1 calc PR . 2
H42D_4 H -0.5757 1.2169 0.5656 0.059 Uiso 0.20 1 calc PR . 2
C43B_4 C -0.661(4) 1.356(5) 0.506(3) 0.06(2) Uani 0.20 1 d PD . 2
H43C_4 H -0.7187 1.3448 0.5039 0.068 Uiso 0.20 1 calc PR . 2
H43D_4 H -0.6500 1.3925 0.4659 0.068 Uiso 0.20 1 calc PR . 2
C42C_4 C -0.611(7) 1.225(5) 0.538(3) 0.09(4) Uani 0.25 1 d PDU J 3
H42E_4 H -0.5655 1.2277 0.5614 0.105 Uiso 0.25 1 calc PR J 3
H42F_4 H -0.6374 1.1789 0.5627 0.105 Uiso 0.25 1 calc PR J 3
C43C_4 C -0.697(6) 1.334(5) 0.514(4) 0.08(3) Uani 0.25 1 d PDU J 3
H43E_4 H -0.7580 1.3427 0.5386 0.100 Uiso 0.25 1 calc PR J 3
H43F_4 H -0.7132 1.3421 0.4734 0.100 Uiso 0.25 1 calc PR J 3
C42D_4 C -0.611(7) 1.225(5) 0.538(3) 0.09(4) Uani 0.25 1 d PD K 4
H42G_4 H -0.5655 1.2277 0.5614 0.105 Uiso 0.25 1 calc PR K 4
H42H_4 H -0.6374 1.1789 0.5627 0.105 Uiso 0.25 1 calc PR K 4
C43D_4 C -0.697(6) 1.334(5) 0.514(4) 0.08(3) Uani 0.25 1 d PD K 4
H43G_4 H -0.7529 1.3269 0.5029 0.100 Uiso 0.25 1 calc PR K 4
H43H_4 H -0.6744 1.3688 0.4779 0.100 Uiso 0.25 1 calc PR K 4
Cl1A_5 Cl 0.223(3) 0.818(3) 0.3131(12) 0.140(16) Uani 0.60 1 d PDU M 1
Cl1B_5 Cl 0.293(4) 0.758(5) 0.3176(19) 0.13(2) Uani 0.40 1 d PDU N 2
Cl2_5 Cl 0.2790(7) 0.0578(7) 0.3330(4) 0.058(2) Uani 1 1 d . . .
O1_5 O 0.2064(17) 0.4530(19) 0.3641(11) 0.056(6) Uani 1 1 d . . .
C1_5 C 0.125(2) 0.486(2) 0.3434(13) 0.041(7) Uani 1 1 d . . .
C2_5 C 0.030(2) 0.579(2) 0.3512(12) 0.040(7) Uani 1 1 d . . .
C3_5 C -0.050(2) 0.583(2) 0.3268(12) 0.036(6) Uani 1 1 d . . .
C4_5 C -0.003(2) 0.503(2) 0.2912(12) 0.035(6) Uani 1 1 d . . .
C5_5 C 0.097(2) 0.439(2) 0.3074(12) 0.036(6) Uani 1 1 d . . .
C6_5 C 0.016(3) 0.649(3) 0.3827(13) 0.046(8) Uani 1 1 d . . .
C7_5 C -0.081(2) 0.727(2) 0.3861(13) 0.043(7) Uani 1 1 d . . .
H7_5 H -0.0925 0.7801 0.4029 0.052 Uiso 1 1 calc R . .
C8_5 C -0.163(2) 0.730(2) 0.3658(12) 0.039(7) Uani 1 1 d . . .
C9_5 C -0.264(3) 0.819(2) 0.3654(12) 0.044(8) Uani 1 1 d . . .
C10_5 C -0.281(3) 0.908(3) 0.3801(13) 0.052(9) Uani 1 1 d . . .
H10_5 H -0.2267 0.9062 0.3963 0.063 Uiso 1 1 calc R . .
C11_5 C -0.371(3) 0.997(3) 0.3720(16) 0.061(10) Uani 1 1 d . . .
H11_5 H -0.3807 1.0556 0.3826 0.073 Uiso 1 1 calc R . .
C12_5 C -0.449(3) 0.999(3) 0.3483(18) 0.073(12) Uani 1 1 d . . .
H12_5 H -0.5113 1.0614 0.3402 0.087 Uiso 1 1 calc R . .
C13_5 C -0.439(3) 0.913(3) 0.3361(17) 0.064(10) Uani 1 1 d . . .
H13_5 H -0.4944 0.9152 0.3212 0.077 Uiso 1 1 calc R . .
C14_5 C -0.347(3) 0.820(2) 0.3455(14) 0.048(8) Uani 1 1 d . . .
C15_5 C -0.335(2) 0.725(2) 0.3359(13) 0.043(7) Uani 1 1 d . . .
C16_5 C -0.419(3) 0.714(3) 0.3301(15) 0.055(9) Uani 1 1 d . . .
H16_5 H -0.4845 0.7710 0.3302 0.066 Uiso 1 1 calc R . .
C17_5 C -0.407(3) 0.622(3) 0.3243(15) 0.056(9) Uani 1 1 d . . .
H17_5 H -0.4638 0.6167 0.3196 0.068 Uiso 1 1 calc R . .
C18_5 C -0.312(3) 0.539(3) 0.3252(14) 0.049(8) Uani 1 1 d . . .
H18_5 H -0.3039 0.4752 0.3217 0.059 Uiso 1 1 calc R . .
C19_5 C -0.229(2) 0.547(2) 0.3310(12) 0.041(7) Uani 1 1 d . . .
H19_5 H -0.1644 0.4885 0.3325 0.049 Uiso 1 1 calc R . .
C20_5 C -0.238(2) 0.641(2) 0.3350(12) 0.037(7) Uani 1 1 d . . .
C21_5 C -0.150(2) 0.650(2) 0.3411(12) 0.035(6) Uani 1 1 d . . .
C22_5 C 0.162(2) 0.352(2) 0.2873(12) 0.037(7) Uani 1 1 d . . .
C23_5 C 0.119(2) 0.326(2) 0.2522(12) 0.039(7) Uani 1 1 d . . .
H23_5 H 0.1586 0.2627 0.2410 0.047 Uiso 1 1 calc R . .
C24_5 C 0.020(2) 0.389(2) 0.2327(12) 0.036(6) Uani 1 1 d . . .
C25_5 C -0.024(2) 0.353(2) 0.2000(12) 0.038(7) Uani 1 1 d . . .
C26_5 C 0.022(3) 0.249(2) 0.1978(14) 0.047(8) Uani 1 1 d . . .
H26_5 H 0.0860 0.2023 0.2159 0.056 Uiso 1 1 calc R . .
C27_5 C -0.020(3) 0.213(3) 0.1708(16) 0.054(9) Uani 1 1 d . . .
H27_5 H 0.0134 0.1423 0.1703 0.065 Uiso 1 1 calc R . .
C28_5 C -0.113(3) 0.281(3) 0.1441(15) 0.050(8) Uani 1 1 d . . .
H28_5 H -0.1433 0.2565 0.1249 0.060 Uiso 1 1 calc R . .
C29_5 C -0.161(2) 0.383(3) 0.1453(14) 0.045(7) Uani 1 1 d . . .
H29_5 H -0.2251 0.4288 0.1270 0.054 Uiso 1 1 calc R . .
C30_5 C -0.119(2) 0.422(2) 0.1731(12) 0.036(6) Uani 1 1 d . . .
C31_5 C -0.170(2) 0.531(2) 0.1753(12) 0.035(6) Uani 1 1 d . . .
C32_5 C -0.257(2) 0.606(2) 0.1428(13) 0.042(7) Uani 1 1 d . . .
H32_5 H -0.2828 0.5853 0.1184 0.050 Uiso 1 1 calc R . .
C33_5 C -0.305(2) 0.707(2) 0.1452(14) 0.045(7) Uani 1 1 d . . .
H33_5 H -0.3662 0.7557 0.1244 0.054 Uiso 1 1 calc R . .
C34_5 C -0.265(2) 0.739(2) 0.1782(13) 0.041(7) Uani 1 1 d . . .
H34_5 H -0.2971 0.8096 0.1792 0.050 Uiso 1 1 calc R . .
C35_5 C -0.178(2) 0.668(2) 0.2094(12) 0.037(7) Uani 1 1 d . . .
H35_5 H -0.1492 0.6912 0.2302 0.045 Uiso 1 1 calc R . .
C36_5 C -0.131(2) 0.562(2) 0.2114(11) 0.032(6) Uani 1 1 d . . .
C37_5 C -0.041(2) 0.486(2) 0.2464(12) 0.034(6) Uani 1 1 d . . .
C38_5 C 0.104(3) 0.641(3) 0.4093(17) 0.066(11) Uani 1 1 d DU . .
H38A_5 H 0.0745 0.6890 0.4353 0.079 Uiso 0.60 1 calc PR O 1
H38B_5 H 0.1384 0.5702 0.4352 0.079 Uiso 0.60 1 calc PR O 1
H38C_5 H 0.1552 0.5683 0.4247 0.079 Uiso 0.40 1 calc PR O 2
H38D_5 H 0.0818 0.6774 0.4410 0.079 Uiso 0.40 1 calc PR O 2
C39A_5 C 0.184(5) 0.662(5) 0.374(3) 0.059(19) Uani 0.60 1 d PDU M 1
H39A_5 H 0.2061 0.6296 0.3410 0.071 Uiso 0.60 1 calc PR M 1
H39B_5 H 0.2431 0.6346 0.3990 0.071 Uiso 0.60 1 calc PR M 1
C40A_5 C 0.135(5) 0.781(6) 0.352(3) 0.10(3) Uani 0.60 1 d PDU M 1
H40A_5 H 0.1084 0.8124 0.3854 0.114 Uiso 0.60 1 calc PR M 1
H40B_5 H 0.0781 0.8068 0.3257 0.114 Uiso 0.60 1 calc PR M 1
C39B_5 C 0.144(7) 0.701(9) 0.353(4) 0.07(4) Uani 0.40 1 d PDU N 2
H39C_5 H 0.1608 0.6664 0.3205 0.089 Uiso 0.40 1 calc PR N 2
H39D_5 H 0.0921 0.7738 0.3386 0.089 Uiso 0.40 1 calc PR N 2
C40B_5 C 0.237(10) 0.695(13) 0.371(5) 0.12(5) Uani 0.40 1 d PDU N 2
H40C_5 H 0.2873 0.6213 0.3851 0.142 Uiso 0.40 1 calc PR N 2
H40D_5 H 0.2187 0.7261 0.4049 0.142 Uiso 0.40 1 calc PR N 2
C41_5 C 0.270(2) 0.282(2) 0.3061(14) 0.044(7) Uani 1 1 d . . .
H41A_5 H 0.3017 0.3252 0.3041 0.053 Uiso 1 1 calc R . .
H41B_5 H 0.3061 0.2379 0.2786 0.053 Uiso 1 1 calc R . .
C42_5 C 0.279(2) 0.213(3) 0.3685(14) 0.047(8) Uani 1 1 d . . .
H42A_5 H 0.3512 0.1661 0.3780 0.057 Uiso 1 1 calc R . .
H42B_5 H 0.2501 0.2571 0.3962 0.057 Uiso 1 1 calc R . .
C43_5 C 0.228(3) 0.147(3) 0.3786(14) 0.052(9) Uani 1 1 d . . .
H43A_5 H 0.1554 0.1928 0.3704 0.062 Uiso 1 1 calc R . .
H43B_5 H 0.2355 0.1070 0.4203 0.062 Uiso 1 1 calc R . .
Cl1A_6 Cl -0.621(2) -0.1146(16) 0.2092(9) 0.123(8) Uani 0.80 1 d PDU P 1
Cl1B_6 Cl -0.698(9) -0.035(9) 0.209(4) 0.16(4) Uani 0.20 1 d PDU P 2
Cl2_6 Cl 0.0648(7) -0.0851(7) 0.1962(4) 0.059(2) Uani 1 1 d . . .
O1_6 O -0.3457(18) -0.0022(17) 0.1702(10) 0.053(6) Uani 1 1 d . . .
C1_6 C -0.368(2) 0.071(2) 0.1903(13) 0.040(7) Uani 1 1 d . . .
C2_6 C -0.464(2) 0.169(2) 0.1826(12) 0.037(7) Uani 1 1 d . . .
C3_6 C -0.454(2) 0.236(2) 0.2068(12) 0.035(6) Uani 1 1 d . . .
C4_6 C -0.357(2) 0.173(2) 0.2419(12) 0.035(6) Uani 1 1 d . . .
C5_6 C -0.302(2) 0.079(2) 0.2256(12) 0.037(6) Uani 1 1 d . . .
C6_6 C -0.549(3) 0.199(2) 0.1526(13) 0.042(7) Uani 1 1 d . . .
C7_6 C -0.627(3) 0.298(2) 0.1483(13) 0.044(7) Uani 1 1 d . . .
H7_6 H -0.6878 0.3184 0.1305 0.053 Uiso 1 1 calc R . .
C8_6 C -0.619(2) 0.370(2) 0.1692(12) 0.038(7) Uani 1 1 d . . .
C9_6 C -0.706(2) 0.472(2) 0.1692(12) 0.041(7) Uani 1 1 d . . .
C10_6 C -0.804(2) 0.496(3) 0.1555(14) 0.047(8) Uani 1 1 d . . .
H10_6 H -0.8113 0.4509 0.1397 0.056 Uiso 1 1 calc R . .
C11_6 C -0.887(3) 0.584(3) 0.1642(15) 0.054(9) Uani 1 1 d . . .
H11_6 H -0.9515 0.5994 0.1541 0.065 Uiso 1 1 calc R . .
C12_6 C -0.877(3) 0.651(3) 0.1878(18) 0.064(10) Uani 1 1 d . . .
H12_6 H -0.9349 0.7099 0.1958 0.076 Uiso 1 1 calc R . .
C13_6 C -0.783(3) 0.631(3) 0.1997(17) 0.058(9) Uani 1 1 d . . .
H13_6 H -0.7765 0.6787 0.2145 0.070 Uiso 1 1 calc R . .
C14_6 C -0.696(2) 0.543(2) 0.1903(13) 0.044(7) Uani 1 1 d . . .
C15_6 C -0.596(2) 0.525(2) 0.1995(13) 0.042(7) Uani 1 1 d . . .
C16_6 C -0.580(3) 0.604(3) 0.2049(15) 0.053(9) Uani 1 1 d . . .
H16_6 H -0.6359 0.6702 0.2047 0.063 Uiso 1 1 calc R . .
C17_6 C -0.485(3) 0.588(3) 0.2103(15) 0.053(9) Uani 1 1 d . . .
H17_6 H -0.4762 0.6423 0.2146 0.064 Uiso 1 1 calc R . .
C18_6 C -0.403(3) 0.493(2) 0.2093(14) 0.048(8) Uani 1 1 d . . .
H18_6 H -0.3375 0.4818 0.2131 0.058 Uiso 1 1 calc R . .
C19_6 C -0.416(2) 0.415(2) 0.2030(12) 0.038(7) Uani 1 1 d . . .
H19_6 H -0.3587 0.3506 0.2005 0.045 Uiso 1 1 calc R . .
C20_6 C -0.512(2) 0.427(2) 0.2001(12) 0.037(7) Uani 1 1 d . . .
C21_6 C -0.527(2) 0.343(2) 0.1933(12) 0.036(6) Uani 1 1 d . . .
C22_6 C -0.205(2) 0.005(2) 0.2453(12) 0.036(6) Uani 1 1 d . . .
C23_6 C -0.162(2) 0.032(2) 0.2791(13) 0.038(7) Uani 1 1 d . . .
H23_6 H -0.0931 -0.0123 0.2895 0.046 Uiso 1 1 calc R . .
C24_6 C -0.214(2) 0.122(2) 0.2987(12) 0.036(6) Uani 1 1 d . . .
C25_6 C -0.161(2) 0.152(2) 0.3303(12) 0.037(6) Uani 1 1 d . . .
C26_6 C -0.057(2) 0.106(3) 0.3304(15) 0.048(8) Uani 1 1 d . . .
H26_6 H -0.0191 0.0499 0.3125 0.057 Uiso 1 1 calc R . .
C27_6 C -0.008(3) 0.138(3) 0.3556(16) 0.054(9) Uani 1 1 d . . .
H27_6 H 0.0629 0.1053 0.3550 0.065 Uiso 1 1 calc R . .
C28_6 C -0.063(3) 0.219(3) 0.3822(16) 0.052(8) Uani 1 1 d . . .
H28_6 H -0.0290 0.2417 0.3997 0.062 Uiso 1 1 calc R . .
C29_6 C -0.167(2) 0.267(2) 0.3830(13) 0.043(7) Uani 1 1 d . . .
H29_6 H -0.2038 0.3220 0.4013 0.052 Uiso 1 1 calc R . .
C30_6 C -0.219(2) 0.235(2) 0.3573(12) 0.036(6) Uani 1 1 d . . .
C31_6 C -0.328(2) 0.284(2) 0.3568(12) 0.035(6) Uani 1 1 d . . .
C32_6 C -0.387(2) 0.353(2) 0.3920(13) 0.041(7) Uani 1 1 d . . .
H32_6 H -0.3550 0.3679 0.4162 0.049 Uiso 1 1 calc R . .
C33_6 C -0.490(2) 0.399(2) 0.3917(14) 0.043(7) Uani 1 1 d . . .
H33_6 H -0.5287 0.4490 0.4137 0.052 Uiso 1 1 calc R . .
C34_6 C -0.538(2) 0.374(2) 0.3594(13) 0.042(7) Uani 1 1 d . . .
H34_6 H -0.6092 0.4040 0.3602 0.050 Uiso 1 1 calc R . .
C35_6 C -0.482(2) 0.305(2) 0.3265(12) 0.039(7) Uani 1 1 d . . .
H35_6 H -0.5147 0.2852 0.3057 0.046 Uiso 1 1 calc R . .
C36_6 C -0.377(2) 0.262(2) 0.3226(11) 0.032(6) Uani 1 1 d . . .
C37_6 C -0.318(2) 0.189(2) 0.2860(12) 0.034(6) Uani 1 1 d . . .
C38_6 C -0.561(3) 0.125(3) 0.1283(16) 0.057(9) Uani 1 1 d . . .
H38A_6 H -0.4991 0.0872 0.1072 0.068 Uiso 1 1 calc R . .
H38B_6 H -0.6172 0.1657 0.0998 0.068 Uiso 1 1 calc R . .
C39_6 C -0.582(4) 0.048(3) 0.177(2) 0.084(14) Uani 1 1 d DU P .
H39A_6 H -0.5248 0.0060 0.2042 0.100 Uiso 1 1 calc R . .
H39B_6 H -0.6423 0.0868 0.1992 0.100 Uiso 1 1 calc R . .
C40_6 C -0.600(5) -0.021(5) 0.155(2) 0.12(2) Uani 1 1 d DU . .
H40A_6 H -0.5406 -0.0578 0.1315 0.144 Uiso 0.80 1 calc PR P 1
H40B_6 H -0.6584 0.0213 0.1284 0.144 Uiso 0.80 1 calc PR P 1
H40C_6 H -0.5382 -0.0889 0.1570 0.144 Uiso 0.20 1 calc PR P 2
H40D_6 H -0.6256 0.0106 0.1143 0.144 Uiso 0.20 1 calc PR P 2
C41_6 C -0.145(3) -0.094(2) 0.2268(14) 0.045(8) Uani 1 1 d . . .
H41A_6 H -0.1883 -0.1263 0.2292 0.054 Uiso 1 1 calc R . .
H41B_6 H -0.0881 -0.1436 0.2541 0.054 Uiso 1 1 calc R . .
C42_6 C -0.104(3) -0.076(2) 0.1638(14) 0.049(9) Uani 1 1 d . . .
H42A_6 H -0.0610 -0.1443 0.1551 0.059 Uiso 1 1 calc R . .
H42B_6 H -0.1617 -0.0367 0.1363 0.059 Uiso 1 1 calc R . .
C43_6 C -0.046(3) -0.019(3) 0.1519(15) 0.056(9) Uani 1 1 d . . .
H43A_6 H -0.0891 0.0506 0.1593 0.068 Uiso 1 1 calc R . .
H43B_6 H -0.0257 -0.0080 0.1100 0.068 Uiso 1 1 calc R . .
 
loop_
 _atom_site_aniso_label
 _atom_site_aniso_U_11
 _atom_site_aniso_U_22
 _atom_site_aniso_U_33
 _atom_site_aniso_U_23
 _atom_site_aniso_U_13
 _atom_site_aniso_U_12
Cl1A_1 0.077(9) 0.072(8) 0.095(9) -0.008(7) -0.012(7) 0.008(7)
Cl1B_1 0.05(5) 0.10(9) 0.12(9) -0.04(8) 0.03(6) -0.04(6)
Cl2_1 0.061(6) 0.061(5) 0.095(7) -0.031(5) 0.004(5) -0.028(5)
O1_1 0.043(14) 0.049(12) 0.066(14) -0.028(11) 0.018(11) -0.019(11)
C1_1 0.037(18) 0.040(16) 0.040(15) -0.014(13) 0.006(13) -0.017(14)
C2_1 0.038(18) 0.043(16) 0.035(14) -0.014(12) -0.001(12) -0.021(14)
C3_1 0.035(17) 0.039(15) 0.032(13) -0.012(11) 0.000(12) -0.018(13)
C4_1 0.036(17) 0.037(15) 0.032(14) -0.010(11) 0.001(12) -0.018(13)
C5_1 0.035(17) 0.037(15) 0.038(15) -0.013(12) 0.006(12) -0.017(13)
C6_1 0.032(17) 0.051(17) 0.037(15) -0.015(13) 0.006(12) -0.021(14)
C7_1 0.041(19) 0.055(18) 0.037(15) -0.013(13) 0.006(13) -0.031(16)
C8_1 0.034(17) 0.046(16) 0.030(13) -0.010(12) 0.001(12) -0.020(14)
C9_1 0.042(18) 0.041(15) 0.033(14) -0.005(12) -0.001(12) -0.026(14)
C10_1 0.05(2) 0.047(17) 0.045(17) -0.004(14) -0.004(14) -0.027(16)
C11_1 0.07(3) 0.049(19) 0.06(2) 0.004(16) -0.015(18) -0.040(19)
C12_1 0.07(3) 0.045(19) 0.07(2) -0.011(17) -0.01(2) -0.033(19)
C13_1 0.06(2) 0.042(18) 0.06(2) -0.014(15) -0.001(17) -0.025(17)
C14_1 0.045(19) 0.041(16) 0.039(15) -0.005(12) -0.001(13) -0.025(15)
C15_1 0.041(18) 0.039(16) 0.035(15) -0.006(12) 0.000(13) -0.020(14)
C16_1 0.05(2) 0.035(16) 0.056(19) -0.011(14) 0.001(15) -0.015(15)
C17_1 0.04(2) 0.042(18) 0.06(2) -0.009(15) 0.002(15) -0.008(15)
C18_1 0.038(19) 0.049(18) 0.049(18) -0.008(14) -0.002(14) -0.019(15)
C19_1 0.037(18) 0.038(15) 0.041(15) -0.005(12) -0.002(13) -0.019(14)
C20_1 0.034(17) 0.036(15) 0.034(14) -0.008(11) 0.001(12) -0.018(13)
C21_1 0.031(16) 0.041(15) 0.028(13) -0.011(11) 0.001(11) -0.019(13)
C22_1 0.05(2) 0.038(15) 0.040(16) -0.014(13) 0.007(14) -0.020(14)
C23_1 0.048(19) 0.039(15) 0.043(16) -0.014(13) 0.009(14) -0.027(15)
C24_1 0.041(18) 0.038(15) 0.034(14) -0.011(12) 0.005(12) -0.021(14)
C25_1 0.037(17) 0.040(15) 0.035(14) -0.011(12) 0.005(12) -0.022(14)
C26_1 0.05(2) 0.057(19) 0.052(18) -0.024(15) 0.009(15) -0.036(17)
C27_1 0.05(2) 0.07(2) 0.06(2) -0.028(18) 0.015(17) -0.041(19)
C28_1 0.04(2) 0.06(2) 0.06(2) -0.022(17) 0.013(16) -0.030(18)
C29_1 0.037(18) 0.049(17) 0.048(17) -0.016(14) 0.007(14) -0.023(15)
C30_1 0.035(17) 0.040(15) 0.033(14) -0.010(12) 0.002(12) -0.018(13)
C31_1 0.033(16) 0.033(14) 0.032(13) -0.007(11) 0.001(11) -0.016(12)
C32_1 0.035(18) 0.044(16) 0.043(16) -0.016(13) 0.004(13) -0.018(14)
C33_1 0.05(2) 0.047(17) 0.046(17) -0.022(14) 0.002(14) -0.022(15)
C34_1 0.042(19) 0.046(17) 0.040(15) -0.016(13) 0.004(13) -0.025(15)
C35_1 0.034(17) 0.042(15) 0.034(14) -0.010(12) 0.004(12) -0.021(13)
C36_1 0.038(17) 0.031(13) 0.031(13) -0.007(11) 0.000(12) -0.015(13)
C37_1 0.034(17) 0.032(14) 0.035(14) -0.010(11) 0.004(12) -0.015(12)
C38_1 0.04(2) 0.06(2) 0.046(17) -0.024(15) 0.014(14) -0.027(17)
C39_1 0.05(2) 0.07(2) 0.05(2) -0.028(18) 0.000(16) -0.013(18)
C40_1 0.07(3) 0.06(2) 0.07(3) -0.02(2) 0.01(2) -0.01(2)
C41_1 0.05(2) 0.036(16) 0.053(18) -0.016(14) 0.007(15) -0.021(15)
C42_1 0.06(2) 0.048(18) 0.06(2) -0.026(16) 0.015(17) -0.027(18)
C43_1 0.09(3) 0.05(2) 0.06(2) -0.019(17) 0.00(2) -0.03(2)
Cl1_2 0.064(6) 0.049(4) 0.051(4) -0.018(3) 0.001(4) -0.028(4)
Cl2A_2 0.059(8) 0.123(12) 0.095(10) -0.008(9) -0.017(7) -0.025(8)
Cl2B_2 0.18(11) 0.05(3) 0.11(7) -0.02(4) 0.04(7) -0.03(5)
O1_2 0.048(14) 0.054(13) 0.061(14) -0.016(11) 0.011(11) -0.034(12)
C1_2 0.036(18) 0.042(16) 0.039(15) -0.008(12) -0.001(13) -0.022(14)
C2_2 0.041(18) 0.036(15) 0.034(14) -0.004(12) -0.004(12) -0.021(14)
C3_2 0.035(16) 0.031(13) 0.031(13) -0.004(11) -0.004(11) -0.016(12)
C4_2 0.035(16) 0.032(14) 0.031(13) -0.003(11) 0.000(11) -0.017(12)
C5_2 0.038(18) 0.039(15) 0.038(15) -0.009(12) 0.000(13) -0.020(14)
C6_2 0.043(18) 0.036(15) 0.034(14) -0.006(11) -0.006(12) -0.021(14)
C7_2 0.041(18) 0.034(14) 0.038(15) -0.010(12) -0.002(13) -0.018(13)
C8_2 0.036(17) 0.035(14) 0.031(13) -0.005(11) -0.004(12) -0.015(13)
C9_2 0.035(17) 0.038(15) 0.032(14) -0.007(11) -0.003(12) -0.014(13)
C10_2 0.05(2) 0.039(16) 0.043(16) -0.010(13) 0.000(15) -0.017(15)
C11_2 0.05(2) 0.045(18) 0.052(19) -0.019(15) 0.000(16) -0.009(16)
C12_2 0.04(2) 0.06(2) 0.049(19) -0.016(16) 0.009(15) -0.016(17)
C13_2 0.042(19) 0.051(18) 0.038(15) -0.008(13) 0.003(14) -0.019(15)
C14_2 0.036(17) 0.040(15) 0.029(13) -0.005(12) -0.002(12) -0.014(13)
C15_2 0.033(17) 0.041(15) 0.031(13) -0.003(11) -0.003(12) -0.018(13)
C16_2 0.033(17) 0.044(17) 0.040(15) 0.001(13) -0.001(13) -0.017(14)
C17_2 0.05(2) 0.041(17) 0.048(18) 0.004(14) -0.003(15) -0.027(16)
C18_2 0.045(19) 0.032(15) 0.039(15) -0.001(12) -0.005(13) -0.016(14)
C19_2 0.036(17) 0.032(14) 0.033(14) -0.005(11) -0.003(12) -0.014(13)
C20_2 0.034(16) 0.033(14) 0.029(13) -0.002(11) -0.005(11) -0.015(12)
C21_2 0.032(16) 0.031(13) 0.032(13) -0.005(11) -0.006(11) -0.013(12)
C22_2 0.033(17) 0.043(16) 0.042(16) -0.011(13) 0.004(13) -0.018(14)
C23_2 0.05(2) 0.040(16) 0.043(16) -0.014(13) 0.006(14) -0.018(15)
C24_2 0.044(19) 0.036(15) 0.034(14) -0.007(12) -0.002(13) -0.019(14)
C25_2 0.06(2) 0.037(15) 0.030(14) -0.005(12) -0.005(13) -0.023(15)
C26_2 0.07(2) 0.042(17) 0.040(16) -0.012(13) -0.001(16) -0.022(17)
C27_2 0.09(3) 0.041(18) 0.045(18) -0.015(14) -0.007(18) -0.026(19)
C28_2 0.10(3) 0.05(2) 0.07(2) -0.014(17) -0.01(2) -0.04(2)
C29_2 0.09(3) 0.06(2) 0.06(2) -0.018(17) 0.00(2) -0.05(2)
C30_2 0.06(2) 0.048(18) 0.035(15) -0.008(13) -0.001(14) -0.034(17)
C31_2 0.06(2) 0.048(18) 0.037(15) -0.008(13) 0.000(14) -0.034(17)
C32_2 0.07(3) 0.07(2) 0.051(19) -0.013(17) 0.001(17) -0.05(2)
C33_2 0.05(2) 0.08(3) 0.06(2) -0.016(19) 0.002(17) -0.04(2)
C34_2 0.04(2) 0.06(2) 0.043(17) -0.010(15) -0.002(14) -0.024(17)
C35_2 0.041(19) 0.045(16) 0.035(14) -0.006(12) -0.004(13) -0.023(15)
C36_2 0.043(19) 0.041(16) 0.029(13) -0.004(12) -0.003(12) -0.024(14)
C37_2 0.038(17) 0.032(14) 0.031(13) -0.004(11) 0.001(12) -0.017(13)
C38_2 0.05(2) 0.040(16) 0.044(16) -0.011(13) -0.001(14) -0.029(15)
C39_2 0.05(2) 0.048(17) 0.040(15) -0.014(13) 0.007(14) -0.037(16)
C40_2 0.06(2) 0.041(16) 0.037(15) -0.009(13) -0.004(14) -0.028(16)
C41_2 0.04(2) 0.056(19) 0.052(19) -0.018(15) 0.013(15) -0.027(16)
C42_2 0.05(2) 0.07(2) 0.07(2) -0.018(18) 0.010(16) -0.028(18)
C43A_2 0.05(3) 0.08(3) 0.07(4) 0.00(3) 0.00(3) -0.03(3)
C43B_2 0.05(13) 0.10(10) 0.06(12) 0.01(8) 0.03(8) -0.02(11)
Cl1A_3 0.089(16) 0.062(11) 0.086(14) -0.005(10) -0.033(12) -0.045(12)
Cl1B_3 0.19(11) 0.09(5) 0.09(6) -0.06(5) 0.02(6) -0.08(7)
Cl1C_3 0.13(9) 0.06(4) 0.08(5) -0.02(4) -0.03(6) -0.04(5)
Cl1D_3 0.08(6) 0.06(5) 0.12(8) 0.00(5) -0.04(6) -0.03(4)
Cl2_3 0.050(6) 0.061(5) 0.092(7) -0.026(5) 0.003(5) -0.027(4)
O1_3 0.055(15) 0.044(12) 0.062(14) -0.002(10) -0.003(11) -0.034(11)
C1_3 0.042(18) 0.036(15) 0.037(15) -0.007(12) 0.000(13) -0.022(14)
C2_3 0.037(17) 0.034(14) 0.037(14) -0.007(12) 0.002(12) -0.020(13)
C3_3 0.030(16) 0.030(13) 0.031(13) -0.005(11) 0.000(11) -0.013(12)
C4_3 0.034(16) 0.033(14) 0.033(14) -0.009(11) 0.000(12) -0.016(12)
C5_3 0.037(17) 0.035(14) 0.036(14) -0.006(12) -0.003(12) -0.020(13)
C6_3 0.043(19) 0.031(14) 0.036(15) -0.004(12) -0.001(13) -0.016(13)
C7_3 0.042(19) 0.034(15) 0.040(15) -0.004(12) -0.003(13) -0.014(14)
C8_3 0.035(17) 0.037(15) 0.031(14) -0.007(11) -0.002(12) -0.015(13)
C9_3 0.040(18) 0.045(17) 0.033(14) -0.009(12) -0.004(12) -0.021(14)
C10_3 0.04(2) 0.051(19) 0.047(18) -0.017(15) -0.007(14) -0.012(15)
C11_3 0.03(2) 0.07(2) 0.07(2) -0.03(2) -0.009(16) -0.016(18)
C12_3 0.04(2) 0.09(3) 0.09(3) -0.04(2) 0.000(19) -0.03(2)
C13_3 0.05(2) 0.07(2) 0.07(2) -0.024(19) 0.000(18) -0.04(2)
C14_3 0.044(19) 0.053(18) 0.037(15) -0.012(13) 0.000(13) -0.028(15)
C15_3 0.042(18) 0.043(16) 0.035(14) -0.007(12) -0.005(13) -0.024(14)
C16_3 0.06(2) 0.049(18) 0.053(19) -0.007(15) -0.008(16) -0.035(18)
C17_3 0.07(3) 0.038(17) 0.052(19) -0.005(14) -0.014(17) -0.031(18)
C18_3 0.06(2) 0.034(15) 0.044(16) -0.011(13) -0.008(15) -0.017(15)
C19_3 0.042(18) 0.037(15) 0.040(15) -0.011(12) -0.003(13) -0.018(14)
C20_3 0.040(17) 0.037(15) 0.030(13) -0.008(11) 0.000(12) -0.021(13)
C21_3 0.035(16) 0.035(14) 0.029(13) -0.007(11) -0.001(11) -0.018(13)
C22_3 0.038(18) 0.040(15) 0.039(15) -0.009(12) -0.002(13) -0.021(14)
C23_3 0.030(17) 0.041(16) 0.040(15) -0.007(13) -0.003(12) -0.016(13)
C24_3 0.033(16) 0.033(14) 0.032(13) -0.008(11) -0.002(11) -0.014(12)
C25_3 0.035(17) 0.036(15) 0.030(13) -0.011(11) -0.003(12) -0.012(13)
C26_3 0.037(18) 0.043(17) 0.042(16) -0.011(13) -0.002(13) -0.014(14)
C27_3 0.038(19) 0.044(18) 0.050(18) -0.012(15) -0.004(15) -0.005(15)
C28_3 0.05(2) 0.036(16) 0.047(18) -0.004(14) -0.003(15) -0.004(15)
C29_3 0.05(2) 0.037(16) 0.041(16) -0.008(13) 0.002(14) -0.013(15)
C30_3 0.037(17) 0.032(14) 0.029(13) -0.008(11) -0.001(12) -0.012(13)
C31_3 0.032(16) 0.033(14) 0.031(13) -0.011(11) 0.001(11) -0.013(12)
C32_3 0.045(19) 0.031(14) 0.035(14) -0.005(11) 0.000(13) -0.017(14)
C33_3 0.05(2) 0.042(16) 0.040(15) -0.008(13) 0.006(14) -0.028(15)
C34_3 0.034(17) 0.042(16) 0.036(14) -0.009(12) 0.001(12) -0.016(13)
C35_3 0.040(18) 0.031(14) 0.032(14) -0.006(11) -0.002(12) -0.016(13)
C36_3 0.031(16) 0.032(14) 0.030(13) -0.008(11) -0.002(11) -0.014(12)
C37_3 0.028(15) 0.032(13) 0.033(13) -0.009(11) -0.001(11) -0.015(12)
C38_3 0.05(2) 0.035(16) 0.056(19) -0.003(14) 0.002(16) -0.022(15)
C39A_3 0.06(4) 0.04(2) 0.05(3) -0.01(2) 0.01(2) -0.03(2)
C40A_3 0.09(5) 0.06(4) 0.06(3) -0.02(3) 0.01(3) -0.06(4)
C39B_3 0.06(4) 0.04(2) 0.05(3) -0.01(2) 0.01(2) -0.03(2)
C40B_3 0.09(5) 0.06(4) 0.06(3) -0.02(3) 0.01(3) -0.06(4)
C39C_3 0.14(16) 0.08(10) 0.08(10) -0.04(9) 0.06(11) -0.08(12)
C40C_3 0.10(14) 0.09(11) 0.13(14) -0.05(9) 0.01(11) -0.08(12)
C39D_3 0.14(16) 0.08(10) 0.08(10) -0.04(9) 0.06(11) -0.08(12)
C40D_3 0.10(14) 0.09(11) 0.13(14) -0.05(9) 0.01(11) -0.08(12)
C41_3 0.042(19) 0.050(18) 0.047(17) -0.009(14) -0.004(14) -0.029(15)
C42_3 0.044(19) 0.050(18) 0.048(17) -0.005(14) 0.000(14) -0.032(16)
C43_3 0.06(2) 0.07(2) 0.06(2) -0.019(17) 0.004(17) -0.04(2)
Cl1_4 0.057(6) 0.063(6) 0.102(8) -0.024(5) 0.003(5) -0.030(5)
Cl2A_4 0.05(2) 0.07(2) 0.10(3) -0.011(19) 0.01(2) -0.019(18)
Cl2B_4 0.12(9) 0.12(8) 0.11(7) -0.09(7) 0.00(6) 0.02(6)
Cl2C_4 0.08(3) 0.05(2) 0.13(5) -0.01(3) 0.02(3) -0.03(2)
Cl2D_4 0.07(3) 0.05(2) 0.08(3) -0.03(2) 0.02(3) -0.01(2)
O1_4 0.041(14) 0.044(12) 0.063(14) -0.002(11) -0.014(11) -0.011(11)
C1_4 0.035(18) 0.038(15) 0.037(15) -0.004(12) -0.002(13) -0.011(14)
C2_4 0.035(17) 0.039(15) 0.039(15) -0.006(12) -0.002(13) -0.018(13)
C3_4 0.029(15) 0.032(14) 0.033(13) -0.006(11) -0.001(11) -0.014(12)
C4_4 0.035(17) 0.030(14) 0.030(13) -0.002(11) -0.006(11) -0.014(12)
C5_4 0.034(17) 0.036(15) 0.034(14) -0.006(12) 0.000(12) -0.014(13)
C6_4 0.033(17) 0.046(16) 0.036(15) -0.007(13) 0.000(12) -0.019(14)
C7_4 0.032(17) 0.045(16) 0.042(16) -0.005(13) -0.002(13) -0.023(14)
C8_4 0.039(17) 0.039(15) 0.030(13) -0.009(11) 0.001(12) -0.021(13)
C9_4 0.040(18) 0.037(15) 0.031(13) -0.011(11) 0.003(12) -0.021(13)
C10_4 0.047(19) 0.046(17) 0.042(16) -0.012(13) -0.001(14) -0.027(15)
C11_4 0.06(2) 0.046(18) 0.050(18) -0.012(14) 0.000(16) -0.039(17)
C12_4 0.07(3) 0.037(16) 0.048(18) -0.004(14) -0.010(17) -0.030(17)
C13_4 0.05(2) 0.036(15) 0.041(16) -0.005(12) -0.008(14) -0.022(15)
C14_4 0.042(18) 0.034(14) 0.031(13) -0.009(11) -0.001(12) -0.019(13)
C15_4 0.037(17) 0.029(13) 0.031(13) -0.007(11) 0.001(12) -0.016(12)
C16_4 0.043(18) 0.032(14) 0.036(14) -0.008(11) -0.005(12) -0.014(13)
C17_4 0.036(17) 0.043(16) 0.036(15) -0.010(12) -0.007(12) -0.016(14)
C18_4 0.041(18) 0.037(15) 0.037(14) -0.008(12) -0.002(13) -0.023(14)
C19_4 0.037(17) 0.031(14) 0.034(14) -0.009(11) 0.004(12) -0.018(12)
C20_4 0.031(16) 0.032(14) 0.028(13) -0.007(11) 0.001(11) -0.015(12)
C21_4 0.030(15) 0.033(14) 0.032(13) -0.009(11) 0.001(11) -0.015(12)
C22_4 0.05(2) 0.033(15) 0.037(15) -0.005(12) -0.007(13) -0.016(14)
C23_4 0.06(2) 0.035(15) 0.038(15) -0.002(12) -0.005(14) -0.028(16)
C24_4 0.045(19) 0.040(15) 0.029(13) -0.007(11) 0.000(12) -0.024(14)
C25_4 0.046(19) 0.049(17) 0.034(14) -0.012(13) 0.004(13) -0.032(15)
C26_4 0.06(2) 0.055(19) 0.047(18) -0.018(15) 0.012(16) -0.039(18)
C27_4 0.07(3) 0.08(3) 0.07(2) -0.04(2) 0.03(2) -0.06(2)
C28_4 0.06(3) 0.09(3) 0.09(3) -0.04(3) 0.02(2) -0.06(3)
C29_4 0.04(2) 0.07(2) 0.07(2) -0.021(19) 0.004(17) -0.031(19)
C30_4 0.043(19) 0.06(2) 0.040(16) -0.016(14) 0.007(14) -0.032(16)
C31_4 0.037(18) 0.046(17) 0.033(14) -0.006(12) 0.002(12) -0.021(14)
C32_4 0.038(19) 0.05(2) 0.046(17) -0.005(15) 0.001(14) -0.019(16)
C33_4 0.04(2) 0.042(18) 0.06(2) -0.009(15) 0.004(16) -0.011(15)
C34_4 0.06(2) 0.040(17) 0.045(17) -0.011(13) 0.008(15) -0.024(16)
C35_4 0.038(18) 0.037(15) 0.039(15) -0.010(12) 0.003(13) -0.019(14)
C36_4 0.036(17) 0.037(15) 0.031(13) -0.006(11) 0.001(12) -0.018(13)
C37_4 0.036(17) 0.034(14) 0.027(13) -0.007(11) -0.002(11) -0.018(13)
C38_4 0.030(17) 0.049(18) 0.051(18) -0.007(14) -0.003(14) -0.016(15)
C39_4 0.035(19) 0.055(19) 0.051(18) -0.003(15) -0.007(14) -0.019(16)
C40_4 0.05(2) 0.07(2) 0.06(2) -0.016(18) 0.002(17) -0.030(19)
C41_4 0.06(2) 0.032(15) 0.06(2) 0.002(14) -0.019(17) -0.018(16)
C42A_4 0.05(5) 0.03(3) 0.05(4) -0.01(3) -0.01(3) 0.00(3)
C43A_4 0.05(5) 0.05(5) 0.06(5) -0.02(4) 0.00(4) -0.01(4)
C42B_4 0.05(5) 0.03(3) 0.05(4) -0.01(3) -0.01(3) 0.00(3)
C43B_4 0.05(5) 0.05(5) 0.06(5) -0.02(4) 0.00(4) -0.01(4)
C42C_4 0.10(9) 0.05(5) 0.09(7) -0.03(5) -0.04(6) 0.00(5)
C43C_4 0.05(7) 0.05(5) 0.13(10) -0.03(6) -0.01(6) -0.01(4)
C42D_4 0.10(9) 0.05(5) 0.09(7) -0.03(5) -0.04(6) 0.00(5)
C43D_4 0.05(7) 0.05(5) 0.13(10) -0.03(6) -0.01(6) -0.01(4)
Cl1A_5 0.18(3) 0.19(3) 0.101(18) 0.04(2) -0.05(2) -0.16(3)
Cl1B_5 0.14(4) 0.24(7) 0.11(3) -0.08(4) 0.04(3) -0.14(5)
Cl2_5 0.055(5) 0.055(5) 0.057(5) -0.020(4) -0.002(4) -0.017(4)
O1_5 0.040(14) 0.068(15) 0.067(15) -0.028(12) -0.009(11) -0.023(12)
C1_5 0.042(19) 0.045(17) 0.041(16) -0.010(13) -0.002(14) -0.025(15)
C2_5 0.05(2) 0.042(16) 0.034(14) -0.008(12) -0.002(13) -0.026(15)
C3_5 0.042(18) 0.035(15) 0.032(13) -0.006(11) -0.001(12) -0.021(13)
C4_5 0.036(17) 0.035(14) 0.035(14) -0.008(11) -0.002(12) -0.019(13)
C5_5 0.038(18) 0.039(15) 0.034(14) -0.006(12) -0.003(12) -0.021(14)
C6_5 0.05(2) 0.057(19) 0.041(16) -0.020(14) 0.007(14) -0.035(17)
C7_5 0.05(2) 0.043(17) 0.044(16) -0.020(13) 0.010(14) -0.027(16)
C8_5 0.05(2) 0.038(15) 0.029(14) -0.008(12) 0.002(13) -0.022(15)
C9_5 0.06(2) 0.038(16) 0.029(14) -0.009(12) 0.006(13) -0.019(15)
C10_5 0.07(2) 0.048(18) 0.036(16) -0.013(14) 0.008(15) -0.023(17)
C11_5 0.08(3) 0.044(19) 0.05(2) -0.020(16) 0.012(19) -0.021(19)
C12_5 0.06(3) 0.05(2) 0.07(2) -0.021(19) 0.01(2) 0.00(2)
C13_5 0.05(2) 0.05(2) 0.07(2) -0.023(18) 0.005(18) -0.009(18)
C14_5 0.04(2) 0.046(18) 0.038(16) -0.012(13) 0.005(14) -0.012(15)
C15_5 0.042(19) 0.049(18) 0.035(15) -0.011(13) 0.003(13) -0.020(15)
C16_5 0.04(2) 0.06(2) 0.051(19) -0.019(16) 0.004(15) -0.016(17)
C17_5 0.05(2) 0.08(3) 0.05(2) -0.017(18) -0.002(16) -0.04(2)
C18_5 0.06(2) 0.06(2) 0.043(17) -0.009(15) -0.001(15) -0.037(18)
C19_5 0.044(19) 0.042(16) 0.035(14) -0.003(12) 0.000(13) -0.024(15)
C20_5 0.039(18) 0.039(15) 0.031(14) -0.005(12) 0.001(12) -0.019(14)
C21_5 0.040(18) 0.032(14) 0.030(13) -0.006(11) 0.002(12) -0.016(13)
C22_5 0.034(17) 0.040(15) 0.035(14) -0.006(12) 0.000(12) -0.018(13)
C23_5 0.041(18) 0.035(15) 0.039(15) -0.011(12) 0.001(13) -0.015(14)
C24_5 0.038(17) 0.035(14) 0.031(14) -0.006(11) -0.003(12) -0.016(13)
C25_5 0.042(18) 0.037(15) 0.035(14) -0.008(12) -0.002(12) -0.019(14)
C26_5 0.05(2) 0.041(17) 0.050(18) -0.014(14) -0.009(15) -0.014(15)
C27_5 0.07(2) 0.041(18) 0.06(2) -0.019(16) -0.008(18) -0.023(17)
C28_5 0.05(2) 0.052(19) 0.054(19) -0.021(16) -0.006(16) -0.028(17)
C29_5 0.039(19) 0.053(19) 0.048(17) -0.017(15) -0.005(14) -0.022(16)
C30_5 0.037(17) 0.040(16) 0.032(14) -0.006(12) 0.000(12) -0.020(14)
C31_5 0.032(16) 0.040(15) 0.032(13) -0.007(11) 0.003(12) -0.020(13)
C32_5 0.045(19) 0.043(17) 0.040(15) -0.002(13) -0.007(13) -0.026(15)
C33_5 0.034(18) 0.042(17) 0.048(17) 0.001(13) -0.008(14) -0.015(14)
C34_5 0.041(18) 0.034(15) 0.040(15) -0.002(12) 0.001(13) -0.016(14)
C35_5 0.041(18) 0.038(15) 0.032(14) -0.005(12) 0.001(12) -0.021(14)
C36_5 0.029(16) 0.035(14) 0.030(13) -0.002(11) 0.001(11) -0.017(12)
C37_5 0.037(17) 0.033(14) 0.033(14) -0.004(11) 0.000(12) -0.019(13)
C38_5 0.06(2) 0.09(3) 0.08(3) -0.06(2) 0.01(2) -0.05(2)
C39A_5 0.04(4) 0.09(5) 0.07(5) -0.04(4) 0.01(3) -0.04(4)
C40A_5 0.08(6) 0.13(6) 0.07(5) 0.03(5) -0.03(4) -0.07(5)
C39B_5 0.05(8) 0.10(10) 0.10(9) -0.04(7) -0.01(6) -0.05(7)
C40B_5 0.13(12) 0.18(15) 0.11(10) -0.04(10) -0.01(9) -0.12(12)
C41_5 0.029(17) 0.052(18) 0.050(17) -0.020(14) 0.000(13) -0.015(14)
C42_5 0.028(17) 0.052(18) 0.046(17) -0.019(14) -0.007(13) -0.002(14)
C43_5 0.04(2) 0.046(18) 0.044(17) -0.009(14) -0.004(15) -0.005(15)
Cl1A_6 0.18(2) 0.097(13) 0.122(15) 0.004(12) -0.038(15) -0.102(15)
Cl1B_6 0.23(13) 0.17(9) 0.15(8) -0.06(8) 0.08(8) -0.17(10)
Cl2_6 0.053(5) 0.057(5) 0.055(5) -0.017(4) -0.006(4) -0.015(4)
O1_6 0.060(16) 0.046(12) 0.060(14) -0.025(11) -0.006(11) -0.023(11)
C1_6 0.05(2) 0.040(16) 0.035(14) -0.011(12) 0.000(13) -0.025(15)
C2_6 0.041(18) 0.040(15) 0.033(14) -0.008(12) -0.003(12) -0.022(14)
C3_6 0.036(17) 0.041(15) 0.032(14) -0.008(12) 0.001(12) -0.022(13)
C4_6 0.038(17) 0.035(14) 0.035(14) -0.009(11) -0.001(12) -0.020(13)
C5_6 0.038(17) 0.039(15) 0.035(14) -0.012(12) 0.002(12) -0.018(14)
C6_6 0.05(2) 0.047(17) 0.036(15) -0.007(13) -0.004(14) -0.032(16)
C7_6 0.05(2) 0.049(18) 0.039(16) -0.004(13) -0.009(14) -0.026(16)
C8_6 0.042(18) 0.042(16) 0.031(14) -0.003(12) -0.004(12) -0.025(14)
C9_6 0.041(19) 0.044(17) 0.034(14) -0.002(12) -0.004(13) -0.020(15)
C10_6 0.040(19) 0.051(18) 0.041(16) 0.001(14) -0.009(14) -0.021(16)
C11_6 0.04(2) 0.06(2) 0.049(19) 0.005(16) -0.007(15) -0.017(16)
C12_6 0.05(2) 0.05(2) 0.07(2) -0.007(18) -0.006(18) -0.009(18)
C13_6 0.05(2) 0.043(18) 0.07(2) -0.009(16) -0.012(17) -0.010(16)
C14_6 0.04(2) 0.039(16) 0.040(16) -0.003(13) -0.006(14) -0.016(14)
C15_6 0.05(2) 0.039(16) 0.036(15) -0.005(12) -0.002(13) -0.022(15)
C16_6 0.06(2) 0.038(17) 0.06(2) -0.011(15) -0.007(17) -0.022(17)
C17_6 0.07(3) 0.046(19) 0.055(19) -0.013(15) -0.007(17) -0.032(18)
C18_6 0.05(2) 0.051(18) 0.046(17) -0.006(14) -0.004(15) -0.033(17)
C19_6 0.037(18) 0.041(15) 0.036(14) -0.006(12) 0.005(12) -0.023(14)
C20_6 0.046(19) 0.041(16) 0.028(13) -0.006(12) 0.000(12) -0.025(14)
C21_6 0.036(17) 0.040(15) 0.031(14) -0.008(12) 0.002(12) -0.020(13)
C22_6 0.039(17) 0.037(15) 0.034(14) -0.010(12) 0.003(12) -0.020(13)
C23_6 0.034(17) 0.036(15) 0.039(15) -0.013(12) -0.002(12) -0.011(13)
C24_6 0.039(18) 0.037(15) 0.033(14) -0.008(12) 0.000(12) -0.020(13)
C25_6 0.034(17) 0.040(15) 0.036(14) -0.010(12) -0.001(12) -0.018(13)
C26_6 0.036(19) 0.053(18) 0.054(18) -0.023(15) -0.002(14) -0.017(15)
C27_6 0.034(19) 0.07(2) 0.06(2) -0.027(18) -0.005(15) -0.023(17)
C28_6 0.04(2) 0.06(2) 0.06(2) -0.023(17) -0.011(16) -0.025(17)
C29_6 0.040(19) 0.047(17) 0.044(16) -0.017(14) -0.006(14) -0.017(15)
C30_6 0.038(18) 0.038(15) 0.034(14) -0.010(12) -0.003(12) -0.018(13)
C31_6 0.040(17) 0.034(14) 0.030(13) -0.007(11) 0.001(12) -0.019(13)
C32_6 0.04(2) 0.040(16) 0.041(15) -0.015(13) 0.002(14) -0.021(14)
C33_6 0.04(2) 0.044(17) 0.047(17) -0.020(14) 0.009(14) -0.023(15)
C34_6 0.032(17) 0.044(16) 0.045(16) -0.012(13) 0.005(13) -0.016(14)
C35_6 0.045(19) 0.040(15) 0.032(14) -0.009(12) -0.001(13) -0.022(14)
C36_6 0.033(16) 0.032(13) 0.032(13) -0.006(11) 0.001(11) -0.017(12)
C37_6 0.038(17) 0.030(13) 0.034(14) -0.007(11) 0.000(12) -0.018(13)
C38_6 0.07(3) 0.05(2) 0.06(2) -0.009(16) -0.022(18) -0.032(19)
C39_6 0.12(4) 0.07(3) 0.08(3) 0.00(2) -0.03(3) -0.07(3)
C40_6 0.18(6) 0.12(4) 0.10(4) -0.02(3) -0.01(4) -0.11(5)
C41_6 0.05(2) 0.032(15) 0.047(17) -0.011(13) -0.011(15) -0.013(14)
C42_6 0.05(2) 0.037(16) 0.043(17) -0.018(13) -0.011(15) 0.000(15)
C43_6 0.05(2) 0.05(2) 0.043(17) -0.009(15) 0.000(15) -0.010(17)
 
_geom_special_details
;
 All esds (except the esd in the dihedral angle between two l.s. planes)
 are estimated using the full covariance matrix.  The cell esds are taken
 into account individually in the estimation of esds in distances, angles
 and torsion angles; correlations between esds in cell parameters are only
 used when they are defined by crystal symmetry.  An approximate (isotropic)
 treatment of cell esds is used for estimating esds involving l.s. planes.
;
 
loop_
 _geom_bond_atom_site_label_1
 _geom_bond_atom_site_label_2
 _geom_bond_distance
 _geom_bond_site_symmetry_2
 _geom_bond_publ_flag
Cl1A_1 C40_1 1.74(4) . ?
Cl1B_1 C40_1 1.78(8) . ?
Cl2_1 C43_1 1.80(4) . ?
O1_1 C1_1 1.22(3) . ?
C1_1 C5_1 1.48(4) . ?
C1_1 C2_1 1.49(4) . ?
C2_1 C6_1 1.40(4) . ?
C2_1 C3_1 1.41(4) . ?
C3_1 C21_1 1.42(4) . ?
C3_1 C4_1 1.50(4) . ?
C4_1 C5_1 1.40(4) . ?
C4_1 C37_1 1.42(4) . ?
C5_1 C22_1 1.40(4) . ?
C6_1 C7_1 1.38(4) . ?
C6_1 C38_1 1.50(4) . ?
C7_1 C8_1 1.40(4) . ?
C7_1 H7_1 0.9500 . ?
C8_1 C21_1 1.43(4) . ?
C8_1 C9_1 1.46(4) . ?
C9_1 C14_1 1.41(4) . ?
C9_1 C10_1 1.41(4) . ?
C10_1 C11_1 1.38(5) . ?
C10_1 H10_1 0.9500 . ?
C11_1 C12_1 1.38(5) . ?
C11_1 H11_1 0.9500 . ?
C12_1 C13_1 1.36(5) . ?
C12_1 H12_1 0.9500 . ?
C13_1 C14_1 1.41(4) . ?
C13_1 H13_1 0.9500 . ?
C14_1 C15_1 1.45(4) . ?
C15_1 C16_1 1.40(4) . ?
C15_1 C20_1 1.41(4) . ?
C16_1 C17_1 1.37(5) . ?
C16_1 H16_1 0.9500 . ?
C17_1 C18_1 1.38(5) . ?
C17_1 H17_1 0.9500 . ?
C18_1 C19_1 1.37(4) . ?
C18_1 H18_1 0.9500 . ?
C19_1 C20_1 1.41(4) . ?
C19_1 H19_1 0.9500 . ?
C20_1 C21_1 1.45(4) . ?
C22_1 C23_1 1.37(4) . ?
C22_1 C41_1 1.52(4) . ?
C23_1 C24_1 1.40(4) . ?
C23_1 H23_1 0.9500 . ?
C24_1 C37_1 1.43(4) . ?
C24_1 C25_1 1.47(4) . ?
C25_1 C26_1 1.40(4) . ?
C25_1 C30_1 1.41(4) . ?
C26_1 C27_1 1.37(5) . ?
C26_1 H26_1 0.9500 . ?
C27_1 C28_1 1.40(5) . ?
C27_1 H27_1 0.9500 . ?
C28_1 C29_1 1.37(5) . ?
C28_1 H28_1 0.9500 . ?
C29_1 C30_1 1.41(4) . ?
C29_1 H29_1 0.9500 . ?
C30_1 C31_1 1.46(4) . ?
C31_1 C36_1 1.41(4) . ?
C31_1 C32_1 1.42(4) . ?
C32_1 C33_1 1.37(4) . ?
C32_1 H32_1 0.9500 . ?
C33_1 C34_1 1.39(4) . ?
C33_1 H33_1 0.9500 . ?
C34_1 C35_1 1.37(4) . ?
C34_1 H34_1 0.9500 . ?
C35_1 C36_1 1.39(4) . ?
C35_1 H35_1 0.9500 . ?
C36_1 C37_1 1.47(4) . ?
C38_1 C39_1 1.49(5) . ?
C38_1 H38A_1 0.9900 . ?
C38_1 H38B_1 0.9900 . ?
C39_1 C40_1 1.51(5) . ?
C39_1 H39A_1 0.9900 . ?
C39_1 H39B_1 0.9900 . ?
C40_1 H40A_1 0.9900 . ?
C40_1 H40B_1 0.9900 . ?
C40_1 H40C_1 0.9900 . ?
C40_1 H40D_1 0.9900 . ?
C41_1 C42_1 1.53(5) . ?
C41_1 H41A_1 0.9900 . ?
C41_1 H41B_1 0.9900 . ?
C42_1 C43_1 1.51(5) . ?
C42_1 H42A_1 0.9900 . ?
C42_1 H42B_1 0.9900 . ?
C43_1 H43A_1 0.9900 . ?
C43_1 H43B_1 0.9900 . ?
Cl1_2 C40_2 1.80(3) . ?
Cl2A_2 C43A_2 1.78(5) . ?
Cl2B_2 C43B_2 1.79(11) . ?
O1_2 C1_2 1.23(3) . ?
C1_2 C5_2 1.48(4) . ?
C1_2 C2_2 1.48(4) . ?
C2_2 C6_2 1.40(4) . ?
C2_2 C3_2 1.41(4) . ?
C3_2 C21_2 1.42(4) . ?
C3_2 C4_2 1.52(4) . ?
C4_2 C37_2 1.41(4) . ?
C4_2 C5_2 1.41(4) . ?
C5_2 C22_2 1.39(4) . ?
C6_2 C7_2 1.38(4) . ?
C6_2 C38_2 1.52(4) . ?
C7_2 C8_2 1.40(4) . ?
C7_2 H7_2 0.9500 . ?
C8_2 C21_2 1.43(4) . ?
C8_2 C9_2 1.47(4) . ?
C9_2 C10_2 1.40(4) . ?
C9_2 C14_2 1.41(4) . ?
C10_2 C11_2 1.37(5) . ?
C10_2 H10_2 0.9500 . ?
C11_2 C12_2 1.39(5) . ?
C11_2 H11_2 0.9500 . ?
C12_2 C13_2 1.38(5) . ?
C12_2 H12_2 0.9500 . ?
C13_2 C14_2 1.41(4) . ?
C13_2 H13_2 0.9500 . ?
C14_2 C15_2 1.46(4) . ?
C15_2 C16_2 1.41(4) . ?
C15_2 C20_2 1.41(4) . ?
C16_2 C17_2 1.36(4) . ?
C16_2 H16_2 0.9500 . ?
C17_2 C18_2 1.38(5) . ?
C17_2 H17_2 0.9500 . ?
C18_2 C19_2 1.36(4) . ?
C18_2 H18_2 0.9500 . ?
C19_2 C20_2 1.40(4) . ?
C19_2 H19_2 0.9500 . ?
C20_2 C21_2 1.47(4) . ?
C22_2 C23_2 1.39(4) . ?
C22_2 C41_2 1.51(4) . ?
C23_2 C24_2 1.39(4) . ?
C23_2 H23_2 0.9500 . ?
C24_2 C37_2 1.45(4) . ?
C24_2 C25_2 1.46(4) . ?
C25_2 C26_2 1.41(4) . ?
C25_2 C30_2 1.41(5) . ?
C26_2 C27_2 1.38(5) . ?
C26_2 H26_2 0.9500 . ?
C27_2 C28_2 1.37(6) . ?
C27_2 H27_2 0.9500 . ?
C28_2 C29_2 1.37(5) . ?
C28_2 H28_2 0.9500 . ?
C29_2 C30_2 1.39(4) . ?
C29_2 H29_2 0.9500 . ?
C30_2 C31_2 1.46(5) . ?
C31_2 C32_2 1.40(5) . ?
C31_2 C36_2 1.42(4) . ?
C32_2 C33_2 1.37(5) . ?
C32_2 H32_2 0.9500 . ?
C33_2 C34_2 1.38(5) . ?
C33_2 H33_2 0.9500 . ?
C34_2 C35_2 1.38(4) . ?
C34_2 H34_2 0.9500 . ?
C35_2 C36_2 1.40(4) . ?
C35_2 H35_2 0.9500 . ?
C36_2 C37_2 1.46(4) . ?
C38_2 C39_2 1.52(4) . ?
C38_2 H38A_2 0.9900 . ?
C38_2 H38B_2 0.9900 . ?
C39_2 C40_2 1.50(5) . ?
C39_2 H39A_2 0.9900 . ?
C39_2 H39B_2 0.9900 . ?
C40_2 H40A_2 0.9900 . ?
C40_2 H40B_2 0.9900 . ?
C41_2 C42_2 1.52(5) . ?
C41_2 H41A_2 0.9900 . ?
C41_2 H41B_2 0.9900 . ?
C42_2 C43B_2 1.52(10) . ?
C42_2 C43A_2 1.52(5) . ?
C42_2 H42A_2 0.9900 . ?
C42_2 H42B_2 0.9900 . ?
C42_2 H42C_2 0.9900 . ?
C42_2 H42D_2 0.9900 . ?
C43A_2 H43A_2 0.9900 . ?
C43A_2 H43B_2 0.9900 . ?
C43B_2 H43C_2 0.9900 . ?
C43B_2 H43D_2 0.9900 . ?
Cl1A_3 C40A_3 1.72(6) . ?
Cl1B_3 Cl2B_4 2.35(11) 1_635 ?
Cl1C_3 C40C_3 1.73(9) . ?
Cl2_3 C43_3 1.80(4) . ?
O1_3 C1_3 1.22(3) . ?
C1_3 C2_3 1.47(4) . ?
C1_3 C5_3 1.49(4) . ?
C2_3 C6_3 1.40(4) . ?
C2_3 C3_3 1.40(4) . ?
C3_3 C21_3 1.41(4) . ?
C3_3 C4_3 1.52(4) . ?
C4_3 C5_3 1.39(4) . ?
C4_3 C37_3 1.43(4) . ?
C5_3 C22_3 1.40(4) . ?
C6_3 C7_3 1.37(4) . ?
C6_3 C38_3 1.51(4) . ?
C7_3 C8_3 1.41(4) . ?
C7_3 H7_3 0.9500 . ?
C8_3 C21_3 1.42(4) . ?
C8_3 C9_3 1.47(4) . ?
C9_3 C14_3 1.42(4) . ?
C9_3 C10_3 1.42(4) . ?
C10_3 C11_3 1.38(5) . ?
C10_3 H10_3 0.9500 . ?
C11_3 C12_3 1.37(6) . ?
C11_3 H11_3 0.9500 . ?
C12_3 C13_3 1.37(5) . ?
C12_3 H12_3 0.9500 . ?
C13_3 C14_3 1.40(4) . ?
C13_3 H13_3 0.9500 . ?
C14_3 C15_3 1.46(4) . ?
C15_3 C16_3 1.41(4) . ?
C15_3 C20_3 1.41(4) . ?
C16_3 C17_3 1.37(5) . ?
C16_3 H16_3 0.9500 . ?
C17_3 C18_3 1.38(5) . ?
C17_3 H17_3 0.9500 . ?
C18_3 C19_3 1.38(4) . ?
C18_3 H18_3 0.9500 . ?
C19_3 C20_3 1.41(4) . ?
C19_3 H19_3 0.9500 . ?
C20_3 C21_3 1.46(4) . ?
C22_3 C23_3 1.39(4) . ?
C22_3 C41_3 1.51(4) . ?
C23_3 C24_3 1.40(4) . ?
C23_3 H23_3 0.9500 . ?
C24_3 C37_3 1.42(4) . ?
C24_3 C25_3 1.48(4) . ?
C25_3 C30_3 1.41(4) . ?
C25_3 C26_3 1.41(4) . ?
C26_3 C27_3 1.39(4) . ?
C26_3 H26_3 0.9500 . ?
C27_3 C28_3 1.39(5) . ?
C27_3 H27_3 0.9500 . ?
C28_3 C29_3 1.37(5) . ?
C28_3 H28_3 0.9500 . ?
C29_3 C30_3 1.41(4) . ?
C29_3 H29_3 0.9500 . ?
C30_3 C31_3 1.46(4) . ?
C31_3 C32_3 1.40(4) . ?
C31_3 C36_3 1.42(4) . ?
C32_3 C33_3 1.38(4) . ?
C32_3 H32_3 0.9500 . ?
C33_3 C34_3 1.39(4) . ?
C33_3 H33_3 0.9500 . ?
C34_3 C35_3 1.37(4) . ?
C34_3 H34_3 0.9500 . ?
C35_3 C36_3 1.40(4) . ?
C35_3 H35_3 0.9500 . ?
C36_3 C37_3 1.46(4) . ?
C38_3 C39C_3 1.51(9) . ?
C38_3 C39A_3 1.52(5) . ?
C38_3 H38A_3 0.9900 . ?
C38_3 H38B_3 0.9900 . ?
C38_3 H38C_3 0.9900 . ?
C38_3 H38D_3 0.9900 . ?
C38_3 H38E_3 0.9900 . ?
C38_3 H38F_3 0.9900 . ?
C38_3 H38G_3 0.9900 . ?
C38_3 H38H_3 0.9900 . ?
C39A_3 C40A_3 1.50(6) . ?
C39A_3 H39A_3 0.9900 . ?
C39A_3 H39B_3 0.9900 . ?
C40A_3 H40A_3 0.9900 . ?
C40A_3 H40B_3 0.9900 . ?
C39C_3 C40C_3 1.54(10) . ?
C39C_3 H39E_3 0.9900 . ?
C39C_3 H39F_3 0.9900 . ?
C40C_3 H40E_3 0.9900 . ?
C40C_3 H40F_3 0.9900 . ?
C41_3 C42_3 1.54(4) . ?
C41_3 H41A_3 0.9900 . ?
C41_3 H41B_3 0.9900 . ?
C42_3 C43_3 1.50(5) . ?
C42_3 H42A_3 0.9900 . ?
C42_3 H42B_3 0.9900 . ?
C43_3 H43A_3 0.9900 . ?
C43_3 H43B_3 0.9900 . ?
Cl1_4 C40_4 1.81(4) . ?
Cl2A_4 C43A_4 1.72(8) . ?
Cl2B_4 Cl1B_3 2.35(11) 1_475 ?
Cl2C_4 C43C_4 1.75(8) . ?
O1_4 C1_4 1.23(3) . ?
C1_4 C5_4 1.48(4) . ?
C1_4 C2_4 1.48(4) . ?
C2_4 C3_4 1.40(4) . ?
C2_4 C6_4 1.40(4) . ?
C3_4 C21_4 1.42(4) . ?
C3_4 C4_4 1.52(4) . ?
C4_4 C37_4 1.40(4) . ?
C4_4 C5_4 1.42(4) . ?
C5_4 C22_4 1.40(4) . ?
C6_4 C7_4 1.38(4) . ?
C6_4 C38_4 1.51(4) . ?
C7_4 C8_4 1.40(4) . ?
C7_4 H7_4 0.9500 . ?
C8_4 C21_4 1.42(4) . ?
C8_4 C9_4 1.48(4) . ?
C9_4 C14_4 1.40(4) . ?
C9_4 C10_4 1.41(4) . ?
C10_4 C11_4 1.37(4) . ?
C10_4 H10_4 0.9500 . ?
C11_4 C12_4 1.40(5) . ?
C11_4 H11_4 0.9500 . ?
C12_4 C13_4 1.37(4) . ?
C12_4 H12_4 0.9500 . ?
C13_4 C14_4 1.41(4) . ?
C13_4 H13_4 0.9500 . ?
C14_4 C15_4 1.47(4) . ?
C15_4 C20_4 1.41(4) . ?
C15_4 C16_4 1.41(4) . ?
C16_4 C17_4 1.37(4) . ?
C16_4 H16_4 0.9500 . ?
C17_4 C18_4 1.39(4) . ?
C17_4 H17_4 0.9500 . ?
C18_4 C19_4 1.37(4) . ?
C18_4 H18_4 0.9500 . ?
C19_4 C20_4 1.41(4) . ?
C19_4 H19_4 0.9500 . ?
C20_4 C21_4 1.47(4) . ?
C22_4 C23_4 1.38(5) . ?
C22_4 C41_4 1.51(4) . ?
C23_4 C24_4 1.40(4) . ?
C23_4 H23_4 0.9500 . ?
C24_4 C37_4 1.43(4) . ?
C24_4 C25_4 1.46(4) . ?
C25_4 C26_4 1.40(4) . ?
C25_4 C30_4 1.42(4) . ?
C26_4 C27_4 1.38(5) . ?
C26_4 H26_4 0.9500 . ?
C27_4 C28_4 1.38(6) . ?
C27_4 H27_4 0.9500 . ?
C28_4 C29_4 1.36(5) . ?
C28_4 H28_4 0.9500 . ?
C29_4 C30_4 1.41(5) . ?
C29_4 H29_4 0.9500 . ?
C30_4 C31_4 1.46(4) . ?
C31_4 C32_4 1.40(4) . ?
C31_4 C36_4 1.42(4) . ?
C32_4 C33_4 1.37(5) . ?
C32_4 H32_4 0.9500 . ?
C33_4 C34_4 1.39(5) . ?
C33_4 H33_4 0.9500 . ?
C34_4 C35_4 1.37(4) . ?
C34_4 H34_4 0.9500 . ?
C35_4 C36_4 1.39(4) . ?
C35_4 H35_4 0.9500 . ?
C36_4 C37_4 1.47(4) . ?
C38_4 C39_4 1.53(5) . ?
C38_4 H38A_4 0.9900 . ?
C38_4 H38B_4 0.9900 . ?
C39_4 C40_4 1.49(5) . ?
C39_4 H39A_4 0.9900 . ?
C39_4 H39B_4 0.9900 . ?
C40_4 H40A_4 0.9900 . ?
C40_4 H40B_4 0.9900 . ?
C41_4 C42A_4 1.50(7) . ?
C41_4 C42C_4 1.51(8) . ?
C41_4 H41A_4 0.9900 . ?
C41_4 H41B_4 0.9900 . ?
C41_4 H41C_4 0.9900 . ?
C41_4 H41D_4 0.9900 . ?
C41_4 H41E_4 0.9900 . ?
C41_4 H41F_4 0.9900 . ?
C41_4 H41G_4 0.9900 . ?
C41_4 H41H_4 0.9900 . ?
C42A_4 C43A_4 1.52(7) . ?
C42A_4 H42A_4 0.9900 . ?
C42A_4 H42B_4 0.9900 . ?
C43A_4 H43A_4 0.9900 . ?
C43A_4 H43B_4 0.9900 . ?
C42C_4 C43C_4 1.53(8) . ?
C42C_4 H42E_4 0.9900 . ?
C42C_4 H42F_4 0.9900 . ?
C43C_4 H43E_4 0.9900 . ?
C43C_4 H43F_4 0.9900 . ?
Cl1A_5 C40A_5 1.75(7) . ?
Cl1B_5 C40B_5 1.75(8) . ?
Cl2_5 C43_5 1.80(3) . ?
O1_5 C1_5 1.22(4) . ?
C1_5 C2_5 1.48(4) . ?
C1_5 C5_5 1.49(4) . ?
C2_5 C6_5 1.41(4) . ?
C2_5 C3_5 1.42(4) . ?
C3_5 C21_5 1.41(4) . ?
C3_5 C4_5 1.52(4) . ?
C4_5 C5_5 1.40(4) . ?
C4_5 C37_5 1.43(4) . ?
C5_5 C22_5 1.39(4) . ?
C6_5 C7_5 1.38(4) . ?
C6_5 C38_5 1.51(5) . ?
C7_5 C8_5 1.39(4) . ?
C7_5 H7_5 0.9500 . ?
C8_5 C21_5 1.43(4) . ?
C8_5 C9_5 1.48(4) . ?
C9_5 C10_5 1.40(4) . ?
C9_5 C14_5 1.41(5) . ?
C10_5 C11_5 1.37(5) . ?
C10_5 H10_5 0.9500 . ?
C11_5 C12_5 1.38(6) . ?
C11_5 H11_5 0.9500 . ?
C12_5 C13_5 1.37(6) . ?
C12_5 H12_5 0.9500 . ?
C13_5 C14_5 1.41(5) . ?
C13_5 H13_5 0.9500 . ?
C14_5 C15_5 1.47(5) . ?
C15_5 C20_5 1.40(4) . ?
C15_5 C16_5 1.41(5) . ?
C16_5 C17_5 1.37(5) . ?
C16_5 H16_5 0.9500 . ?
C17_5 C18_5 1.38(5) . ?
C17_5 H17_5 0.9500 . ?
C18_5 C19_5 1.37(4) . ?
C18_5 H18_5 0.9500 . ?
C19_5 C20_5 1.40(4) . ?
C19_5 H19_5 0.9500 . ?
C20_5 C21_5 1.47(4) . ?
C22_5 C23_5 1.39(4) . ?
C22_5 C41_5 1.50(4) . ?
C23_5 C24_5 1.39(4) . ?
C23_5 H23_5 0.9500 . ?
C24_5 C37_5 1.42(4) . ?
C24_5 C25_5 1.47(4) . ?
C25_5 C26_5 1.40(4) . ?
C25_5 C30_5 1.41(4) . ?
C26_5 C27_5 1.36(5) . ?
C26_5 H26_5 0.9500 . ?
C27_5 C28_5 1.39(5) . ?
C27_5 H27_5 0.9500 . ?
C28_5 C29_5 1.37(4) . ?
C28_5 H28_5 0.9500 . ?
C29_5 C30_5 1.41(4) . ?
C29_5 H29_5 0.9500 . ?
C30_5 C31_5 1.47(4) . ?
C31_5 C32_5 1.40(4) . ?
C31_5 C36_5 1.42(4) . ?
C32_5 C33_5 1.37(4) . ?
C32_5 H32_5 0.9500 . ?
C33_5 C34_5 1.38(4) . ?
C33_5 H33_5 0.9500 . ?
C34_5 C35_5 1.37(4) . ?
C34_5 H34_5 0.9500 . ?
C35_5 C36_5 1.40(4) . ?
C35_5 H35_5 0.9500 . ?
C36_5 C37_5 1.46(4) . ?
C38_5 C39A_5 1.50(6) . ?
C38_5 C39B_5 1.61(9) . ?
C38_5 H38A_5 0.9900 . ?
C38_5 H38B_5 0.9900 . ?
C38_5 H38C_5 0.9900 . ?
C38_5 H38D_5 0.9900 . ?
C39A_5 C40A_5 1.54(8) . ?
C39A_5 H39A_5 0.9900 . ?
C39A_5 H39B_5 0.9900 . ?
C40A_5 H40A_5 0.9900 . ?
C40A_5 H40B_5 0.9900 . ?
C39B_5 C40B_5 1.51(9) . ?
C39B_5 H39C_5 0.9900 . ?
C39B_5 H39D_5 0.9900 . ?
C40B_5 H40C_5 0.9900 . ?
C40B_5 H40D_5 0.9900 . ?
C41_5 C42_5 1.53(5) . ?
C41_5 H41A_5 0.9900 . ?
C41_5 H41B_5 0.9900 . ?
C42_5 C43_5 1.51(5) . ?
C42_5 H42A_5 0.9900 . ?
C42_5 H42B_5 0.9900 . ?
C43_5 H43A_5 0.9900 . ?
C43_5 H43B_5 0.9900 . ?
Cl1A_6 C40_6 1.75(5) . ?
Cl1B_6 C40_6 1.89(8) . ?
Cl2_6 C43_6 1.79(4) . ?
O1_6 C1_6 1.22(3) . ?
C1_6 C5_6 1.48(4) . ?
C1_6 C2_6 1.48(4) . ?
C2_6 C6_6 1.39(4) . ?
C2_6 C3_6 1.40(4) . ?
C3_6 C21_6 1.42(4) . ?
C3_6 C4_6 1.52(4) . ?
C4_6 C5_6 1.41(4) . ?
C4_6 C37_6 1.41(4) . ?
C5_6 C22_6 1.40(4) . ?
C6_6 C7_6 1.38(4) . ?
C6_6 C38_6 1.51(4) . ?
C7_6 C8_6 1.40(4) . ?
C7_6 H7_6 0.9500 . ?
C8_6 C21_6 1.43(4) . ?
C8_6 C9_6 1.47(4) . ?
C9_6 C10_6 1.41(4) . ?
C9_6 C14_6 1.41(4) . ?
C10_6 C11_6 1.37(5) . ?
C10_6 H10_6 0.9500 . ?
C11_6 C12_6 1.38(5) . ?
C11_6 H11_6 0.9500 . ?
C12_6 C13_6 1.38(5) . ?
C12_6 H12_6 0.9500 . ?
C13_6 C14_6 1.40(5) . ?
C13_6 H13_6 0.9500 . ?
C14_6 C15_6 1.45(5) . ?
C15_6 C16_6 1.41(4) . ?
C15_6 C20_6 1.41(4) . ?
C16_6 C17_6 1.37(5) . ?
C16_6 H16_6 0.9500 . ?
C17_6 C18_6 1.38(5) . ?
C17_6 H17_6 0.9500 . ?
C18_6 C19_6 1.36(4) . ?
C18_6 H18_6 0.9500 . ?
C19_6 C20_6 1.41(4) . ?
C19_6 H19_6 0.9500 . ?
C20_6 C21_6 1.46(4) . ?
C22_6 C23_6 1.37(4) . ?
C22_6 C41_6 1.51(4) . ?
C23_6 C24_6 1.39(4) . ?
C23_6 H23_6 0.9500 . ?
C24_6 C37_6 1.42(4) . ?
C24_6 C25_6 1.48(4) . ?
C25_6 C26_6 1.39(4) . ?
C25_6 C30_6 1.42(4) . ?
C26_6 C27_6 1.37(5) . ?
C26_6 H26_6 0.9500 . ?
C27_6 C28_6 1.39(5) . ?
C27_6 H27_6 0.9500 . ?
C28_6 C29_6 1.38(5) . ?
C28_6 H28_6 0.9500 . ?
C29_6 C30_6 1.40(4) . ?
C29_6 H29_6 0.9500 . ?
C30_6 C31_6 1.46(4) . ?
C31_6 C36_6 1.40(4) . ?
C31_6 C32_6 1.42(4) . ?
C32_6 C33_6 1.37(4) . ?
C32_6 H32_6 0.9500 . ?
C33_6 C34_6 1.39(4) . ?
C33_6 H33_6 0.9500 . ?
C34_6 C35_6 1.37(4) . ?
C34_6 H34_6 0.9500 . ?
C35_6 C36_6 1.40(4) . ?
C35_6 H35_6 0.9500 . ?
C36_6 C37_6 1.48(4) . ?
C38_6 C39_6 1.52(5) . ?
C38_6 H38A_6 0.9900 . ?
C38_6 H38B_6 0.9900 . ?
C39_6 C40_6 1.46(5) . ?
C39_6 H39A_6 0.9900 . ?
C39_6 H39B_6 0.9900 . ?
C40_6 H40A_6 0.9900 . ?
C40_6 H40B_6 0.9900 . ?
C40_6 H40C_6 0.9900 . ?
C40_6 H40D_6 0.9900 . ?
C41_6 C42_6 1.54(5) . ?
C41_6 H41A_6 0.9900 . ?
C41_6 H41B_6 0.9900 . ?
C42_6 C43_6 1.49(5) . ?
C42_6 H42A_6 0.9900 . ?
C42_6 H42B_6 0.9900 . ?
C43_6 H43A_6 0.9900 . ?
C43_6 H43B_6 0.9900 . ?
 
loop_
 _geom_angle_atom_site_label_1
 _geom_angle_atom_site_label_2
 _geom_angle_atom_site_label_3
 _geom_angle
 _geom_angle_site_symmetry_1
 _geom_angle_site_symmetry_3
 _geom_angle_publ_flag
O1_1 C1_1 C5_1 127(3) . . ?
O1_1 C1_1 C2_1 127(3) . . ?
C5_1 C1_1 C2_1 106(2) . . ?
C6_1 C2_1 C3_1 123(3) . . ?
C6_1 C2_1 C1_1 129(3) . . ?
C3_1 C2_1 C1_1 108(3) . . ?
C2_1 C3_1 C21_1 119(3) . . ?
C2_1 C3_1 C4_1 108(2) . . ?
C21_1 C3_1 C4_1 134(3) . . ?
C5_1 C4_1 C37_1 119(3) . . ?
C5_1 C4_1 C3_1 107(2) . . ?
C37_1 C4_1 C3_1 134(2) . . ?
C22_1 C5_1 C4_1 122(3) . . ?
C22_1 C5_1 C1_1 128(3) . . ?
C4_1 C5_1 C1_1 109(3) . . ?
C7_1 C6_1 C2_1 117(3) . . ?
C7_1 C6_1 C38_1 121(3) . . ?
C2_1 C6_1 C38_1 122(3) . . ?
C6_1 C7_1 C8_1 123(3) . . ?
C6_1 C7_1 H7_1 118.5 . . ?
C8_1 C7_1 H7_1 118.5 . . ?
C7_1 C8_1 C21_1 119(3) . . ?
C7_1 C8_1 C9_1 122(3) . . ?
C21_1 C8_1 C9_1 119(3) . . ?
C14_1 C9_1 C10_1 118(3) . . ?
C14_1 C9_1 C8_1 120(3) . . ?
C10_1 C9_1 C8_1 122(3) . . ?
C11_1 C10_1 C9_1 121(3) . . ?
C11_1 C10_1 H10_1 119.5 . . ?
C9_1 C10_1 H10_1 119.5 . . ?
C10_1 C11_1 C12_1 120(3) . . ?
C10_1 C11_1 H11_1 120.0 . . ?
C12_1 C11_1 H11_1 120.0 . . ?
C13_1 C12_1 C11_1 120(3) . . ?
C13_1 C12_1 H12_1 119.8 . . ?
C11_1 C12_1 H12_1 119.8 . . ?
C12_1 C13_1 C14_1 121(3) . . ?
C12_1 C13_1 H13_1 119.4 . . ?
C14_1 C13_1 H13_1 119.4 . . ?
C9_1 C14_1 C13_1 119(3) . . ?
C9_1 C14_1 C15_1 120(3) . . ?
C13_1 C14_1 C15_1 121(3) . . ?
C16_1 C15_1 C20_1 119(3) . . ?
C16_1 C15_1 C14_1 122(3) . . ?
C20_1 C15_1 C14_1 119(3) . . ?
C17_1 C16_1 C15_1 121(3) . . ?
C17_1 C16_1 H16_1 119.3 . . ?
C15_1 C16_1 H16_1 119.3 . . ?
C16_1 C17_1 C18_1 120(3) . . ?
C16_1 C17_1 H17_1 119.8 . . ?
C18_1 C17_1 H17_1 119.8 . . ?
C19_1 C18_1 C17_1 120(3) . . ?
C19_1 C18_1 H18_1 120.2 . . ?
C17_1 C18_1 H18_1 120.2 . . ?
C18_1 C19_1 C20_1 122(3) . . ?
C18_1 C19_1 H19_1 119.2 . . ?
C20_1 C19_1 H19_1 119.2 . . ?
C15_1 C20_1 C19_1 118(3) . . ?
C15_1 C20_1 C21_1 120(3) . . ?
C19_1 C20_1 C21_1 122(3) . . ?
C3_1 C21_1 C8_1 117(3) . . ?
C3_1 C21_1 C20_1 124(3) . . ?
C8_1 C21_1 C20_1 118(3) . . ?
C23_1 C22_1 C5_1 117(3) . . ?
C23_1 C22_1 C41_1 120(3) . . ?
C5_1 C22_1 C41_1 122(3) . . ?
C22_1 C23_1 C24_1 123(3) . . ?
C22_1 C23_1 H23_1 118.7 . . ?
C24_1 C23_1 H23_1 118.7 . . ?
C23_1 C24_1 C37_1 120(3) . . ?
C23_1 C24_1 C25_1 121(3) . . ?
C37_1 C24_1 C25_1 119(2) . . ?
C26_1 C25_1 C30_1 119(3) . . ?
C26_1 C25_1 C24_1 121(3) . . ?
C30_1 C25_1 C24_1 120(3) . . ?
C27_1 C26_1 C25_1 122(3) . . ?
C27_1 C26_1 H26_1 118.9 . . ?
C25_1 C26_1 H26_1 118.9 . . ?
C26_1 C27_1 C28_1 119(3) . . ?
C26_1 C27_1 H27_1 120.5 . . ?
C28_1 C27_1 H27_1 120.5 . . ?
C29_1 C28_1 C27_1 120(3) . . ?
C29_1 C28_1 H28_1 119.9 . . ?
C27_1 C28_1 H28_1 119.9 . . ?
C28_1 C29_1 C30_1 122(3) . . ?
C28_1 C29_1 H29_1 119.2 . . ?
C30_1 C29_1 H29_1 119.2 . . ?
C29_1 C30_1 C25_1 118(3) . . ?
C29_1 C30_1 C31_1 122(3) . . ?
C25_1 C30_1 C31_1 119(3) . . ?
C36_1 C31_1 C32_1 118(3) . . ?
C36_1 C31_1 C30_1 121(2) . . ?
C32_1 C31_1 C30_1 121(3) . . ?
C33_1 C32_1 C31_1 121(3) . . ?
C33_1 C32_1 H32_1 119.4 . . ?
C31_1 C32_1 H32_1 119.4 . . ?
C32_1 C33_1 C34_1 120(3) . . ?
C32_1 C33_1 H33_1 119.9 . . ?
C34_1 C33_1 H33_1 119.9 . . ?
C35_1 C34_1 C33_1 119(3) . . ?
C35_1 C34_1 H34_1 120.3 . . ?
C33_1 C34_1 H34_1 120.3 . . ?
C34_1 C35_1 C36_1 122(3) . . ?
C34_1 C35_1 H35_1 118.9 . . ?
C36_1 C35_1 H35_1 118.9 . . ?
C35_1 C36_1 C31_1 119(2) . . ?
C35_1 C36_1 C37_1 121(3) . . ?
C31_1 C36_1 C37_1 120(3) . . ?
C4_1 C37_1 C24_1 116(2) . . ?
C4_1 C37_1 C36_1 125(3) . . ?
C24_1 C37_1 C36_1 118(2) . . ?
C39_1 C38_1 C6_1 113(3) . . ?
C39_1 C38_1 H38A_1 108.9 . . ?
C6_1 C38_1 H38A_1 108.9 . . ?
C39_1 C38_1 H38B_1 108.9 . . ?
C6_1 C38_1 H38B_1 108.9 . . ?
H38A_1 C38_1 H38B_1 107.7 . . ?
C38_1 C39_1 C40_1 112(3) . . ?
C38_1 C39_1 H39A_1 109.2 . . ?
C40_1 C39_1 H39A_1 109.2 . . ?
C38_1 C39_1 H39B_1 109.2 . . ?
C40_1 C39_1 H39B_1 109.2 . . ?
H39A_1 C39_1 H39B_1 107.9 . . ?
C39_1 C40_1 Cl1A_1 114(3) . . ?
C39_1 C40_1 Cl1B_1 110(4) . . ?
C39_1 C40_1 H40A_1 108.8 . . ?
Cl1A_1 C40_1 H40A_1 108.8 . . ?
Cl1B_1 C40_1 H40A_1 140.5 . . ?
C39_1 C40_1 H40B_1 108.8 . . ?
Cl1A_1 C40_1 H40B_1 108.8 . . ?
H40A_1 C40_1 H40B_1 107.7 . . ?
C39_1 C40_1 H40C_1 109.7 . . ?
Cl1B_1 C40_1 H40C_1 109.7 . . ?
C39_1 C40_1 H40D_1 109.7 . . ?
Cl1B_1 C40_1 H40D_1 109.7 . . ?
H40C_1 C40_1 H40D_1 108.2 . . ?
C22_1 C41_1 C42_1 112(3) . . ?
C22_1 C41_1 H41A_1 109.2 . . ?
C42_1 C41_1 H41A_1 109.2 . . ?
C22_1 C41_1 H41B_1 109.2 . . ?
C42_1 C41_1 H41B_1 109.2 . . ?
H41A_1 C41_1 H41B_1 107.9 . . ?
C43_1 C42_1 C41_1 115(3) . . ?
C43_1 C42_1 H42A_1 108.5 . . ?
C41_1 C42_1 H42A_1 108.5 . . ?
C43_1 C42_1 H42B_1 108.5 . . ?
C41_1 C42_1 H42B_1 108.5 . . ?
H42A_1 C42_1 H42B_1 107.5 . . ?
C42_1 C43_1 Cl2_1 113(3) . . ?
C42_1 C43_1 H43A_1 109.0 . . ?
Cl2_1 C43_1 H43A_1 109.0 . . ?
C42_1 C43_1 H43B_1 109.0 . . ?
Cl2_1 C43_1 H43B_1 109.0 . . ?
H43A_1 C43_1 H43B_1 107.8 . . ?
O1_2 C1_2 C5_2 127(3) . . ?
O1_2 C1_2 C2_2 127(3) . . ?
C5_2 C1_2 C2_2 106(2) . . ?
C6_2 C2_2 C3_2 123(3) . . ?
C6_2 C2_2 C1_2 128(3) . . ?
C3_2 C2_2 C1_2 109(2) . . ?
C2_2 C3_2 C21_2 119(2) . . ?
C2_2 C3_2 C4_2 107(2) . . ?
C21_2 C3_2 C4_2 134(3) . . ?
C37_2 C4_2 C5_2 119(3) . . ?
C37_2 C4_2 C3_2 134(3) . . ?
C5_2 C4_2 C3_2 107(2) . . ?
C22_2 C5_2 C4_2 123(3) . . ?
C22_2 C5_2 C1_2 127(3) . . ?
C4_2 C5_2 C1_2 109(3) . . ?
C7_2 C6_2 C2_2 116(3) . . ?
C7_2 C6_2 C38_2 121(3) . . ?
C2_2 C6_2 C38_2 122(3) . . ?
C6_2 C7_2 C8_2 123(3) . . ?
C6_2 C7_2 H7_2 118.5 . . ?
C8_2 C7_2 H7_2 118.5 . . ?
C7_2 C8_2 C21_2 120(3) . . ?
C7_2 C8_2 C9_2 120(3) . . ?
C21_2 C8_2 C9_2 120(3) . . ?
C10_2 C9_2 C14_2 119(3) . . ?
C10_2 C9_2 C8_2 121(3) . . ?
C14_2 C9_2 C8_2 119(3) . . ?
C11_2 C10_2 C9_2 121(3) . . ?
C11_2 C10_2 H10_2 119.4 . . ?
C9_2 C10_2 H10_2 119.4 . . ?
C10_2 C11_2 C12_2 120(3) . . ?
C10_2 C11_2 H11_2 120.0 . . ?
C12_2 C11_2 H11_2 120.0 . . ?
C13_2 C12_2 C11_2 120(3) . . ?
C13_2 C12_2 H12_2 120.0 . . ?
C11_2 C12_2 H12_2 120.0 . . ?
C12_2 C13_2 C14_2 121(3) . . ?
C12_2 C13_2 H13_2 119.4 . . ?
C14_2 C13_2 H13_2 119.4 . . ?
C13_2 C14_2 C9_2 118(3) . . ?
C13_2 C14_2 C15_2 122(3) . . ?
C9_2 C14_2 C15_2 120(3) . . ?
C16_2 C15_2 C20_2 118(3) . . ?
C16_2 C15_2 C14_2 122(3) . . ?
C20_2 C15_2 C14_2 120(3) . . ?
C17_2 C16_2 C15_2 122(3) . . ?
C17_2 C16_2 H16_2 119.0 . . ?
C15_2 C16_2 H16_2 119.0 . . ?
C16_2 C17_2 C18_2 120(3) . . ?
C16_2 C17_2 H17_2 120.2 . . ?
C18_2 C17_2 H17_2 120.2 . . ?
C19_2 C18_2 C17_2 120(3) . . ?
C19_2 C18_2 H18_2 119.8 . . ?
C17_2 C18_2 H18_2 119.8 . . ?
C18_2 C19_2 C20_2 121(3) . . ?
C18_2 C19_2 H19_2 119.3 . . ?
C20_2 C19_2 H19_2 118.0 . . ?
C19_2 C20_2 C15_2 118(3) . . ?
C19_2 C20_2 C21_2 121(3) . . ?
C15_2 C20_2 C21_2 120(2) . . ?
C3_2 C21_2 C8_2 117(3) . . ?
C3_2 C21_2 C20_2 125(2) . . ?
C8_2 C21_2 C20_2 118(2) . . ?
C23_2 C22_2 C5_2 116(3) . . ?
C23_2 C22_2 C41_2 121(3) . . ?
C5_2 C22_2 C41_2 123(3) . . ?
C22_2 C23_2 C24_2 123(3) . . ?
C22_2 C23_2 H23_2 118.5 . . ?
C24_2 C23_2 H23_2 118.5 . . ?
C23_2 C24_2 C37_2 120(3) . . ?
C23_2 C24_2 C25_2 122(3) . . ?
C37_2 C24_2 C25_2 118(3) . . ?
C26_2 C25_2 C30_2 118(3) . . ?
C26_2 C25_2 C24_2 121(3) . . ?
C30_2 C25_2 C24_2 121(3) . . ?
C27_2 C26_2 C25_2 121(4) . . ?
C27_2 C26_2 H26_2 119.6 . . ?
C25_2 C26_2 H26_2 119.6 . . ?
C28_2 C27_2 C26_2 120(4) . . ?
C28_2 C27_2 H27_2 119.9 . . ?
C26_2 C27_2 H27_2 119.9 . . ?
C27_2 C28_2 C29_2 120(3) . . ?
C27_2 C28_2 H28_2 119.9 . . ?
C29_2 C28_2 H28_2 119.9 . . ?
C28_2 C29_2 C30_2 121(4) . . ?
C28_2 C29_2 H29_2 119.3 . . ?
C30_2 C29_2 H29_2 119.3 . . ?
C29_2 C30_2 C25_2 119(3) . . ?
C29_2 C30_2 C31_2 122(3) . . ?
C25_2 C30_2 C31_2 119(3) . . ?
C32_2 C31_2 C36_2 119(3) . . ?
C32_2 C31_2 C30_2 121(3) . . ?
C36_2 C31_2 C30_2 120(3) . . ?
C33_2 C32_2 C31_2 122(3) . . ?
C33_2 C32_2 H32_2 119.2 . . ?
C31_2 C32_2 H32_2 119.2 . . ?
C32_2 C33_2 C34_2 120(3) . . ?
C32_2 C33_2 H33_2 120.0 . . ?
C34_2 C33_2 H33_2 120.0 . . ?
C35_2 C34_2 C33_2 120(3) . . ?
C35_2 C34_2 H34_2 120.2 . . ?
C33_2 C34_2 H34_2 120.2 . . ?
C34_2 C35_2 C36_2 122(3) . . ?
C34_2 C35_2 H35_2 118.9 . . ?
C36_2 C35_2 H35_2 118.9 . . ?
C35_2 C36_2 C31_2 118(3) . . ?
C35_2 C36_2 C37_2 122(3) . . ?
C31_2 C36_2 C37_2 120(3) . . ?
C4_2 C37_2 C24_2 116(3) . . ?
C4_2 C37_2 C36_2 125(3) . . ?
C24_2 C37_2 C36_2 118(3) . . ?
C6_2 C38_2 C39_2 112(2) . . ?
C6_2 C38_2 H38A_2 109.3 . . ?
C39_2 C38_2 H38A_2 109.3 . . ?
C6_2 C38_2 H38B_2 109.3 . . ?
C39_2 C38_2 H38B_2 109.3 . . ?
H38A_2 C38_2 H38B_2 108.0 . . ?
C40_2 C39_2 C38_2 115(3) . . ?
C40_2 C39_2 H39A_2 108.6 . . ?
C38_2 C39_2 H39A_2 108.6 . . ?
C40_2 C39_2 H39B_2 108.6 . . ?
C38_2 C39_2 H39B_2 108.6 . . ?
H39A_2 C39_2 H39B_2 107.5 . . ?
C39_2 C40_2 Cl1_2 113(2) . . ?
C39_2 C40_2 H40A_2 109.0 . . ?
Cl1_2 C40_2 H40A_2 109.0 . . ?
C39_2 C40_2 H40B_2 109.0 . . ?
Cl1_2 C40_2 H40B_2 109.0 . . ?
H40A_2 C40_2 H40B_2 107.8 . . ?
C22_2 C41_2 C42_2 115(3) . . ?
C22_2 C41_2 H41A_2 108.5 . . ?
C42_2 C41_2 H41A_2 108.5 . . ?
C22_2 C41_2 H41B_2 108.5 . . ?
C42_2 C41_2 H41B_2 108.5 . . ?
H41A_2 C41_2 H41B_2 107.5 . . ?
C43B_2 C42_2 C41_2 113(9) . . ?
C43A_2 C42_2 C41_2 109(3) . . ?
C43B_2 C42_2 H42A_2 126.3 . . ?
C43A_2 C42_2 H42A_2 110.0 . . ?
C41_2 C42_2 H42A_2 110.0 . . ?
C43A_2 C42_2 H42B_2 110.0 . . ?
C41_2 C42_2 H42B_2 110.0 . . ?
H42A_2 C42_2 H42B_2 108.3 . . ?
C43B_2 C42_2 H42C_2 109.1 . . ?
C41_2 C42_2 H42C_2 109.1 . . ?
C43B_2 C42_2 H42D_2 109.1 . . ?
C41_2 C42_2 H42D_2 109.1 . . ?
H42C_2 C42_2 H42D_2 107.8 . . ?
C42_2 C43A_2 Cl2A_2 111(4) . . ?
C42_2 C43A_2 H43A_2 109.3 . . ?
Cl2A_2 C43A_2 H43A_2 109.3 . . ?
C42_2 C43A_2 H43B_2 109.3 . . ?
Cl2A_2 C43A_2 H43B_2 109.3 . . ?
H43A_2 C43A_2 H43B_2 108.0 . . ?
C42_2 C43B_2 Cl2B_2 104(7) . . ?
C42_2 C43B_2 H43C_2 110.9 . . ?
Cl2B_2 C43B_2 H43C_2 110.9 . . ?
C42_2 C43B_2 H43D_2 110.9 . . ?
Cl2B_2 C43B_2 H43D_2 110.9 . . ?
H43C_2 C43B_2 H43D_2 108.9 . . ?
O1_3 C1_3 C2_3 128(3) . . ?
O1_3 C1_3 C5_3 126(3) . . ?
C2_3 C1_3 C5_3 106(2) . . ?
C6_3 C2_3 C3_3 122(3) . . ?
C6_3 C2_3 C1_3 129(3) . . ?
C3_3 C2_3 C1_3 109(2) . . ?
C2_3 C3_3 C21_3 119(2) . . ?
C2_3 C3_3 C4_3 107(2) . . ?
C21_3 C3_3 C4_3 133(2) . . ?
C5_3 C4_3 C37_3 119(3) . . ?
C5_3 C4_3 C3_3 107(2) . . ?
C37_3 C4_3 C3_3 134(3) . . ?
C4_3 C5_3 C22_3 124(3) . . ?
C4_3 C5_3 C1_3 108(3) . . ?
C22_3 C5_3 C1_3 127(3) . . ?
C7_3 C6_3 C2_3 117(3) . . ?
C7_3 C6_3 C38_3 121(3) . . ?
C2_3 C6_3 C38_3 123(3) . . ?
C6_3 C7_3 C8_3 122(3) . . ?
C6_3 C7_3 H7_3 118.8 . . ?
C8_3 C7_3 H7_3 120.0 . . ?
C7_3 C8_3 C21_3 120(3) . . ?
C7_3 C8_3 C9_3 121(3) . . ?
C21_3 C8_3 C9_3 119(3) . . ?
C14_3 C9_3 C10_3 118(3) . . ?
C14_3 C9_3 C8_3 120(3) . . ?
C10_3 C9_3 C8_3 122(3) . . ?
C11_3 C10_3 C9_3 121(3) . . ?
C11_3 C10_3 H10_3 119.4 . . ?
C9_3 C10_3 H10_3 119.4 . . ?
C12_3 C11_3 C10_3 120(3) . . ?
C12_3 C11_3 H11_3 120.2 . . ?
C10_3 C11_3 H11_3 120.2 . . ?
C13_3 C12_3 C11_3 121(4) . . ?
C13_3 C12_3 H12_3 119.6 . . ?
C11_3 C12_3 H12_3 119.6 . . ?
C12_3 C13_3 C14_3 121(4) . . ?
C12_3 C13_3 H13_3 119.3 . . ?
C14_3 C13_3 H13_3 119.3 . . ?
C13_3 C14_3 C9_3 118(3) . . ?
C13_3 C14_3 C15_3 122(3) . . ?
C9_3 C14_3 C15_3 120(3) . . ?
C16_3 C15_3 C20_3 119(3) . . ?
C16_3 C15_3 C14_3 122(3) . . ?
C20_3 C15_3 C14_3 119(3) . . ?
C17_3 C16_3 C15_3 121(3) . . ?
C17_3 C16_3 H16_3 119.4 . . ?
C15_3 C16_3 H16_3 119.4 . . ?
C16_3 C17_3 C18_3 120(3) . . ?
C16_3 C17_3 H17_3 119.8 . . ?
C18_3 C17_3 H17_3 119.8 . . ?
C17_3 C18_3 C19_3 120(3) . . ?
C17_3 C18_3 H18_3 120.0 . . ?
C19_3 C18_3 H18_3 120.0 . . ?
C18_3 C19_3 C20_3 121(3) . . ?
C18_3 C19_3 H19_3 119.6 . . ?
C20_3 C19_3 H19_3 119.6 . . ?
C15_3 C20_3 C19_3 119(3) . . ?
C15_3 C20_3 C21_3 120(3) . . ?
C19_3 C20_3 C21_3 121(3) . . ?
C3_3 C21_3 C8_3 117(2) . . ?
C3_3 C21_3 C20_3 125(3) . . ?
C8_3 C21_3 C20_3 119(3) . . ?
C23_3 C22_3 C5_3 116(3) . . ?
C23_3 C22_3 C41_3 121(3) . . ?
C5_3 C22_3 C41_3 123(3) . . ?
C22_3 C23_3 C24_3 122(3) . . ?
C22_3 C23_3 H23_3 119.0 . . ?
C24_3 C23_3 H23_3 119.0 . . ?
C23_3 C24_3 C37_3 121(2) . . ?
C23_3 C24_3 C25_3 120(3) . . ?
C37_3 C24_3 C25_3 119(3) . . ?
C30_3 C25_3 C26_3 120(3) . . ?
C30_3 C25_3 C24_3 120(3) . . ?
C26_3 C25_3 C24_3 121(3) . . ?
C27_3 C26_3 C25_3 121(3) . . ?
C27_3 C26_3 H26_3 119.7 . . ?
C25_3 C26_3 H26_3 119.7 . . ?
C28_3 C27_3 C26_3 120(3) . . ?
C28_3 C27_3 H27_3 120.2 . . ?
C26_3 C27_3 H27_3 120.2 . . ?
C29_3 C28_3 C27_3 121(3) . . ?
C29_3 C28_3 H28_3 121.0 . . ?
C27_3 C28_3 H28_3 119.7 . . ?
C28_3 C29_3 C30_3 121(3) . . ?
C28_3 C29_3 H29_3 119.3 . . ?
C30_3 C29_3 H29_3 119.3 . . ?
C25_3 C30_3 C29_3 118(3) . . ?
C25_3 C30_3 C31_3 120(2) . . ?
C29_3 C30_3 C31_3 122(3) . . ?
C32_3 C31_3 C36_3 118(3) . . ?
C32_3 C31_3 C30_3 122(2) . . ?
C36_3 C31_3 C30_3 120(3) . . ?
C33_3 C32_3 C31_3 122(3) . . ?
C33_3 C32_3 H32_3 120.0 . . ?
C31_3 C32_3 H32_3 118.9 . . ?
C32_3 C33_3 C34_3 119(3) . . ?
C32_3 C33_3 H33_3 120.4 . . ?
C34_3 C33_3 H33_3 120.4 . . ?
C35_3 C34_3 C33_3 120(3) . . ?
C35_3 C34_3 H34_3 120.2 . . ?
C33_3 C34_3 H34_3 120.2 . . ?
C34_3 C35_3 C36_3 123(3) . . ?
C34_3 C35_3 H35_3 118.7 . . ?
C36_3 C35_3 H35_3 118.7 . . ?
C35_3 C36_3 C31_3 118(3) . . ?
C35_3 C36_3 C37_3 122(2) . . ?
C31_3 C36_3 C37_3 120(2) . . ?
C24_3 C37_3 C4_3 116(2) . . ?
C24_3 C37_3 C36_3 119(2) . . ?
C4_3 C37_3 C36_3 125(2) . . ?
C6_3 C38_3 C39C_3 113(5) . . ?
C6_3 C38_3 C39A_3 113(3) . . ?
C6_3 C38_3 H38A_3 109.0 . . ?
C39A_3 C38_3 H38A_3 109.0 . . ?
C6_3 C38_3 H38B_3 109.0 . . ?
C39A_3 C38_3 H38B_3 109.0 . . ?
H38A_3 C38_3 H38B_3 107.8 . . ?
C6_3 C38_3 H38C_3 109.0 . . ?
C39A_3 C38_3 H38C_3 109.0 . . ?
H38B_3 C38_3 H38C_3 107.8 . . ?
C6_3 C38_3 H38D_3 109.0 . . ?
C39A_3 C38_3 H38D_3 109.0 . . ?
H38A_3 C38_3 H38D_3 107.8 . . ?
H38C_3 C38_3 H38D_3 107.8 . . ?
C6_3 C38_3 H38E_3 109.0 . . ?
C39C_3 C38_3 H38E_3 109.0 . . ?
C6_3 C38_3 H38F_3 109.0 . . ?
C39C_3 C38_3 H38F_3 109.0 . . ?
H38E_3 C38_3 H38F_3 107.8 . . ?
C6_3 C38_3 H38G_3 109.0 . . ?
C39C_3 C38_3 H38G_3 109.0 . . ?
H38F_3 C38_3 H38G_3 107.8 . . ?
C6_3 C38_3 H38H_3 109.0 . . ?
C39C_3 C38_3 H38H_3 109.0 . . ?
H38E_3 C38_3 H38H_3 107.8 . . ?
H38G_3 C38_3 H38H_3 107.8 . . ?
C40A_3 C39A_3 C38_3 112(4) . . ?
C40A_3 C39A_3 H39A_3 109.2 . . ?
C38_3 C39A_3 H39A_3 109.2 . . ?
C40A_3 C39A_3 H39B_3 109.2 . . ?
C38_3 C39A_3 H39B_3 109.2 . . ?
H39A_3 C39A_3 H39B_3 109.0 . . ?
C39A_3 C40A_3 Cl1A_3 115(4) . . ?
C39A_3 C40A_3 H40A_3 108.6 . . ?
Cl1A_3 C40A_3 H40A_3 108.6 . . ?
C39A_3 C40A_3 H40B_3 108.6 . . ?
Cl1A_3 C40A_3 H40B_3 108.6 . . ?
H40A_3 C40A_3 H40B_3 107.6 . . ?
C38_3 C39C_3 C40C_3 108(8) . . ?
C38_3 C39C_3 H39E_3 110.2 . . ?
C40C_3 C39C_3 H39E_3 110.2 . . ?
C38_3 C39C_3 H39F_3 110.2 . . ?
C40C_3 C39C_3 H39F_3 110.2 . . ?
H39E_3 C39C_3 H39F_3 108.5 . . ?
C39C_3 C40C_3 Cl1C_3 114(8) . . ?
C39C_3 C40C_3 H40E_3 108.8 . . ?
Cl1C_3 C40C_3 H40E_3 108.8 . . ?
C39C_3 C40C_3 H40F_3 110.0 . . ?
Cl1C_3 C40C_3 H40F_3 108.8 . . ?
H40E_3 C40C_3 H40F_3 107.7 . . ?
C22_3 C41_3 C42_3 112(2) . . ?
C22_3 C41_3 H41A_3 109.1 . . ?
C42_3 C41_3 H41A_3 109.1 . . ?
C22_3 C41_3 H41B_3 109.1 . . ?
C42_3 C41_3 H41B_3 109.1 . . ?
H41A_3 C41_3 H41B_3 107.9 . . ?
C43_3 C42_3 C41_3 115(3) . . ?
C43_3 C42_3 H42A_3 108.4 . . ?
C41_3 C42_3 H42A_3 108.4 . . ?
C43_3 C42_3 H42B_3 108.4 . . ?
C41_3 C42_3 H42B_3 108.4 . . ?
H42A_3 C42_3 H42B_3 107.5 . . ?
C42_3 C43_3 Cl2_3 113(2) . . ?
C42_3 C43_3 H43A_3 109.0 . . ?
Cl2_3 C43_3 H43A_3 109.0 . . ?
C42_3 C43_3 H43B_3 109.0 . . ?
Cl2_3 C43_3 H43B_3 109.0 . . ?
H43A_3 C43_3 H43B_3 107.8 . . ?
O1_4 C1_4 C5_4 127(3) . . ?
O1_4 C1_4 C2_4 126(3) . . ?
C5_4 C1_4 C2_4 106(2) . . ?
C3_4 C2_4 C6_4 123(3) . . ?
C3_4 C2_4 C1_4 109(3) . . ?
C6_4 C2_4 C1_4 127(3) . . ?
C2_4 C3_4 C21_4 119(3) . . ?
C2_4 C3_4 C4_4 107(2) . . ?
C21_4 C3_4 C4_4 133(3) . . ?
C37_4 C4_4 C5_4 120(3) . . ?
C37_4 C4_4 C3_4 134(2) . . ?
C5_4 C4_4 C3_4 106(2) . . ?
C22_4 C5_4 C4_4 122(3) . . ?
C22_4 C5_4 C1_4 129(3) . . ?
C4_4 C5_4 C1_4 109(3) . . ?
C7_4 C6_4 C2_4 116(3) . . ?
C7_4 C6_4 C38_4 121(3) . . ?
C2_4 C6_4 C38_4 123(3) . . ?
C6_4 C7_4 C8_4 123(3) . . ?
C6_4 C7_4 H7_4 118.7 . . ?
C8_4 C7_4 H7_4 118.7 . . ?
C7_4 C8_4 C21_4 120(3) . . ?
C7_4 C8_4 C9_4 120(3) . . ?
C21_4 C8_4 C9_4 119(3) . . ?
C14_4 C9_4 C10_4 119(3) . . ?
C14_4 C9_4 C8_4 120(3) . . ?
C10_4 C9_4 C8_4 121(3) . . ?
C11_4 C10_4 C9_4 122(3) . . ?
C11_4 C10_4 H10_4 119.2 . . ?
C9_4 C10_4 H10_4 119.2 . . ?
C10_4 C11_4 C12_4 120(3) . . ?
C10_4 C11_4 H11_4 120.2 . . ?
C12_4 C11_4 H11_4 120.2 . . ?
C13_4 C12_4 C11_4 120(3) . . ?
C13_4 C12_4 H12_4 121.0 . . ?
C11_4 C12_4 H12_4 119.9 . . ?
C12_4 C13_4 C14_4 121(3) . . ?
C12_4 C13_4 H13_4 119.5 . . ?
C14_4 C13_4 H13_4 118.0 . . ?
C9_4 C14_4 C13_4 119(3) . . ?
C9_4 C14_4 C15_4 119(2) . . ?
C13_4 C14_4 C15_4 121(3) . . ?
C20_4 C15_4 C16_4 119(3) . . ?
C20_4 C15_4 C14_4 120(3) . . ?
C16_4 C15_4 C14_4 121(2) . . ?
C17_4 C16_4 C15_4 121(3) . . ?
C17_4 C16_4 H16_4 119.5 . . ?
C15_4 C16_4 H16_4 119.5 . . ?
C16_4 C17_4 C18_4 120(3) . . ?
C16_4 C17_4 H17_4 120.0 . . ?
C18_4 C17_4 H17_4 120.0 . . ?
C19_4 C18_4 C17_4 120(3) . . ?
C19_4 C18_4 H18_4 120.1 . . ?
C17_4 C18_4 H18_4 120.1 . . ?
C18_4 C19_4 C20_4 122(3) . . ?
C18_4 C19_4 H19_4 119.1 . . ?
C20_4 C19_4 H19_4 119.1 . . ?
C19_4 C20_4 C15_4 118(2) . . ?
C19_4 C20_4 C21_4 121(2) . . ?
C15_4 C20_4 C21_4 120(2) . . ?
C3_4 C21_4 C8_4 116(2) . . ?
C3_4 C21_4 C20_4 125(3) . . ?
C8_4 C21_4 C20_4 118(2) . . ?
C23_4 C22_4 C5_4 117(3) . . ?
C23_4 C22_4 C41_4 121(3) . . ?
C5_4 C22_4 C41_4 122(3) . . ?
C22_4 C23_4 C24_4 123(3) . . ?
C22_4 C23_4 H23_4 118.7 . . ?
C24_4 C23_4 H23_4 118.7 . . ?
C23_4 C24_4 C37_4 120(3) . . ?
C23_4 C24_4 C25_4 121(3) . . ?
C37_4 C24_4 C25_4 119(3) . . ?
C26_4 C25_4 C30_4 118(3) . . ?
C26_4 C25_4 C24_4 122(3) . . ?
C30_4 C25_4 C24_4 120(3) . . ?
C27_4 C26_4 C25_4 121(3) . . ?
C27_4 C26_4 H26_4 119.3 . . ?
C25_4 C26_4 H26_4 119.3 . . ?
C26_4 C27_4 C28_4 120(3) . . ?
C26_4 C27_4 H27_4 120.1 . . ?
C28_4 C27_4 H27_4 120.1 . . ?
C29_4 C28_4 C27_4 121(4) . . ?
C29_4 C28_4 H28_4 119.6 . . ?
C27_4 C28_4 H28_4 119.6 . . ?
C28_4 C29_4 C30_4 121(4) . . ?
C28_4 C29_4 H29_4 119.5 . . ?
C30_4 C29_4 H29_4 119.5 . . ?
C29_4 C30_4 C25_4 118(3) . . ?
C29_4 C30_4 C31_4 122(3) . . ?
C25_4 C30_4 C31_4 120(3) . . ?
C32_4 C31_4 C36_4 118(3) . . ?
C32_4 C31_4 C30_4 122(3) . . ?
C36_4 C31_4 C30_4 120(3) . . ?
C33_4 C32_4 C31_4 122(3) . . ?
C33_4 C32_4 H32_4 119.0 . . ?
C31_4 C32_4 H32_4 119.0 . . ?
C32_4 C33_4 C34_4 119(3) . . ?
C32_4 C33_4 H33_4 120.4 . . ?
C34_4 C33_4 H33_4 120.4 . . ?
C35_4 C34_4 C33_4 120(3) . . ?
C35_4 C34_4 H34_4 119.8 . . ?
C33_4 C34_4 H34_4 119.8 . . ?
C34_4 C35_4 C36_4 122(3) . . ?
C34_4 C35_4 H35_4 119.2 . . ?
C36_4 C35_4 H35_4 119.2 . . ?
C35_4 C36_4 C31_4 118(3) . . ?
C35_4 C36_4 C37_4 122(3) . . ?
C31_4 C36_4 C37_4 120(3) . . ?
C4_4 C37_4 C24_4 117(2) . . ?
C4_4 C37_4 C36_4 124(2) . . ?
C24_4 C37_4 C36_4 119(3) . . ?
C6_4 C38_4 C39_4 112(3) . . ?
C6_4 C38_4 H38A_4 109.1 . . ?
C39_4 C38_4 H38A_4 109.1 . . ?
C6_4 C38_4 H38B_4 109.1 . . ?
C39_4 C38_4 H38B_4 109.1 . . ?
H38A_4 C38_4 H38B_4 107.9 . . ?
C40_4 C39_4 C38_4 115(3) . . ?
C40_4 C39_4 H39A_4 108.5 . . ?
C38_4 C39_4 H39A_4 108.5 . . ?
C40_4 C39_4 H39B_4 108.5 . . ?
C38_4 C39_4 H39B_4 108.5 . . ?
H39A_4 C39_4 H39B_4 107.5 . . ?
C39_4 C40_4 Cl1_4 113(3) . . ?
C39_4 C40_4 H40A_4 109.1 . . ?
Cl1_4 C40_4 H40A_4 109.1 . . ?
C39_4 C40_4 H40B_4 109.1 . . ?
Cl1_4 C40_4 H40B_4 109.1 . . ?
H40A_4 C40_4 H40B_4 107.8 . . ?
C42A_4 C41_4 C22_4 113(3) . . ?
C42C_4 C41_4 C22_4 112(4) . . ?
C42A_4 C41_4 H41A_4 108.9 . . ?
C42C_4 C41_4 H41A_4 133.8 . . ?
C22_4 C41_4 H41A_4 108.9 . . ?
C42A_4 C41_4 H41B_4 108.9 . . ?
C22_4 C41_4 H41B_4 108.9 . . ?
H41A_4 C41_4 H41B_4 107.7 . . ?
C42A_4 C41_4 H41C_4 108.9 . . ?
C22_4 C41_4 H41C_4 108.9 . . ?
H41B_4 C41_4 H41C_4 107.7 . . ?
C42A_4 C41_4 H41D_4 108.9 . . ?
C22_4 C41_4 H41D_4 108.9 . . ?
H41A_4 C41_4 H41D_4 107.7 . . ?
H41C_4 C41_4 H41D_4 107.7 . . ?
C42C_4 C41_4 H41E_4 109.1 . . ?
C22_4 C41_4 H41E_4 109.1 . . ?
C42C_4 C41_4 H41F_4 109.1 . . ?
C22_4 C41_4 H41F_4 109.1 . . ?
H41E_4 C41_4 H41F_4 107.8 . . ?
C42C_4 C41_4 H41G_4 109.1 . . ?
C22_4 C41_4 H41G_4 109.1 . . ?
H41F_4 C41_4 H41G_4 107.8 . . ?
C42C_4 C41_4 H41H_4 109.1 . . ?
C22_4 C41_4 H41H_4 109.1 . . ?
H41E_4 C41_4 H41H_4 107.8 . . ?
H41G_4 C41_4 H41H_4 107.8 . . ?
C41_4 C42A_4 C43A_4 111(5) . . ?
C41_4 C42A_4 H42A_4 109.5 . . ?
C43A_4 C42A_4 H42A_4 109.5 . . ?
C41_4 C42A_4 H42B_4 109.5 . . ?
C43A_4 C42A_4 H42B_4 109.5 . . ?
H42A_4 C42A_4 H42B_4 107.0 . . ?
C42A_4 C43A_4 Cl2A_4 113(6) . . ?
C42A_4 C43A_4 H43A_4 108.9 . . ?
Cl2A_4 C43A_4 H43A_4 108.9 . . ?
C42A_4 C43A_4 H43B_4 108.9 . . ?
Cl2A_4 C43A_4 H43B_4 108.9 . . ?
H43A_4 C43A_4 H43B_4 107.7 . . ?
C41_4 C42C_4 C43C_4 108(6) . . ?
C41_4 C42C_4 H42E_4 110.0 . . ?
C43C_4 C42C_4 H42E_4 110.0 . . ?
C41_4 C42C_4 H42F_4 110.0 . . ?
C43C_4 C42C_4 H42F_4 110.0 . . ?
H42E_4 C42C_4 H42F_4 108.4 . . ?
C42C_4 C43C_4 Cl2C_4 111(7) . . ?
C42C_4 C43C_4 H43E_4 109.5 . . ?
Cl2C_4 C43C_4 H43E_4 109.5 . . ?
C42C_4 C43C_4 H43F_4 109.5 . . ?
Cl2C_4 C43C_4 H43F_4 109.5 . . ?
H43E_4 C43C_4 H43F_4 107.0 . . ?
O1_5 C1_5 C2_5 127(3) . . ?
O1_5 C1_5 C5_5 127(3) . . ?
C2_5 C1_5 C5_5 106(3) . . ?
C6_5 C2_5 C3_5 123(3) . . ?
C6_5 C2_5 C1_5 128(3) . . ?
C3_5 C2_5 C1_5 109(2) . . ?
C21_5 C3_5 C2_5 119(3) . . ?
C21_5 C3_5 C4_5 135(3) . . ?
C2_5 C3_5 C4_5 106(3) . . ?
C5_5 C4_5 C37_5 119(3) . . ?
C5_5 C4_5 C3_5 108(2) . . ?
C37_5 C4_5 C3_5 133(3) . . ?
C22_5 C5_5 C4_5 124(3) . . ?
C22_5 C5_5 C1_5 127(3) . . ?
C4_5 C5_5 C1_5 109(2) . . ?
C7_5 C6_5 C2_5 116(3) . . ?
C7_5 C6_5 C38_5 122(3) . . ?
C2_5 C6_5 C38_5 121(3) . . ?
C6_5 C7_5 C8_5 123(3) . . ?
C6_5 C7_5 H7_5 118.6 . . ?
C8_5 C7_5 H7_5 118.6 . . ?
C7_5 C8_5 C21_5 121(3) . . ?
C7_5 C8_5 C9_5 121(3) . . ?
C21_5 C8_5 C9_5 119(3) . . ?
C10_5 C9_5 C14_5 118(3) . . ?
C10_5 C9_5 C8_5 122(3) . . ?
C14_5 C9_5 C8_5 120(3) . . ?
C11_5 C10_5 C9_5 122(4) . . ?
C11_5 C10_5 H10_5 118.9 . . ?
C9_5 C10_5 H10_5 118.9 . . ?
C10_5 C11_5 C12_5 119(4) . . ?
C10_5 C11_5 H11_5 120.6 . . ?
C12_5 C11_5 H11_5 120.6 . . ?
C13_5 C12_5 C11_5 121(4) . . ?
C13_5 C12_5 H12_5 119.4 . . ?
C11_5 C12_5 H12_5 119.4 . . ?
C12_5 C13_5 C14_5 120(4) . . ?
C12_5 C13_5 H13_5 119.9 . . ?
C14_5 C13_5 H13_5 119.9 . . ?
C9_5 C14_5 C13_5 119(3) . . ?
C9_5 C14_5 C15_5 120(3) . . ?
C13_5 C14_5 C15_5 121(3) . . ?
C20_5 C15_5 C16_5 119(3) . . ?
C20_5 C15_5 C14_5 120(3) . . ?
C16_5 C15_5 C14_5 121(3) . . ?
C17_5 C16_5 C15_5 121(3) . . ?
C17_5 C16_5 H16_5 119.7 . . ?
C15_5 C16_5 H16_5 119.7 . . ?
C16_5 C17_5 C18_5 120(3) . . ?
C16_5 C17_5 H17_5 119.8 . . ?
C18_5 C17_5 H17_5 121.0 . . ?
C19_5 C18_5 C17_5 120(3) . . ?
C19_5 C18_5 H18_5 120.0 . . ?
C17_5 C18_5 H18_5 120.0 . . ?
C18_5 C19_5 C20_5 121(3) . . ?
C18_5 C19_5 H19_5 119.3 . . ?
C20_5 C19_5 H19_5 119.3 . . ?
C15_5 C20_5 C19_5 119(3) . . ?
C15_5 C20_5 C21_5 120(3) . . ?
C19_5 C20_5 C21_5 121(3) . . ?
C3_5 C21_5 C8_5 117(3) . . ?
C3_5 C21_5 C20_5 125(3) . . ?
C8_5 C21_5 C20_5 118(3) . . ?
C23_5 C22_5 C5_5 116(3) . . ?
C23_5 C22_5 C41_5 121(3) . . ?
C5_5 C22_5 C41_5 123(3) . . ?
C22_5 C23_5 C24_5 123(3) . . ?
C22_5 C23_5 H23_5 118.7 . . ?
C24_5 C23_5 H23_5 118.7 . . ?
C23_5 C24_5 C37_5 121(3) . . ?
C23_5 C24_5 C25_5 120(3) . . ?
C37_5 C24_5 C25_5 119(3) . . ?
C26_5 C25_5 C30_5 118(3) . . ?
C26_5 C25_5 C24_5 122(3) . . ?
C30_5 C25_5 C24_5 120(3) . . ?
C27_5 C26_5 C25_5 123(3) . . ?
C27_5 C26_5 H26_5 118.6 . . ?
C25_5 C26_5 H26_5 118.6 . . ?
C26_5 C27_5 C28_5 120(3) . . ?
C26_5 C27_5 H27_5 120.2 . . ?
C28_5 C27_5 H27_5 120.2 . . ?
C29_5 C28_5 C27_5 120(3) . . ?
C29_5 C28_5 H28_5 120.1 . . ?
C27_5 C28_5 H28_5 120.1 . . ?
C28_5 C29_5 C30_5 122(3) . . ?
C28_5 C29_5 H29_5 119.2 . . ?
C30_5 C29_5 H29_5 119.2 . . ?
C29_5 C30_5 C25_5 118(3) . . ?
C29_5 C30_5 C31_5 122(3) . . ?
C25_5 C30_5 C31_5 119(3) . . ?
C32_5 C31_5 C36_5 118(3) . . ?
C32_5 C31_5 C30_5 122(3) . . ?
C36_5 C31_5 C30_5 120(3) . . ?
C33_5 C32_5 C31_5 122(3) . . ?
C33_5 C32_5 H32_5 119.0 . . ?
C31_5 C32_5 H32_5 119.0 . . ?
C32_5 C33_5 C34_5 120(3) . . ?
C32_5 C33_5 H33_5 120.2 . . ?
C34_5 C33_5 H33_5 120.2 . . ?
C35_5 C34_5 C33_5 120(3) . . ?
C35_5 C34_5 H34_5 120.1 . . ?
C33_5 C34_5 H34_5 120.1 . . ?
C34_5 C35_5 C36_5 122(3) . . ?
C34_5 C35_5 H35_5 119.1 . . ?
C36_5 C35_5 H35_5 119.1 . . ?
C35_5 C36_5 C31_5 118(3) . . ?
C35_5 C36_5 C37_5 122(3) . . ?
C31_5 C36_5 C37_5 120(2) . . ?
C24_5 C37_5 C4_5 116(3) . . ?
C24_5 C37_5 C36_5 118(2) . . ?
C4_5 C37_5 C36_5 126(3) . . ?
C39A_5 C38_5 C6_5 124(4) . . ?
C6_5 C38_5 C39B_5 101(4) . . ?
C39A_5 C38_5 H38A_5 106.3 . . ?
C6_5 C38_5 H38A_5 106.3 . . ?
C39B_5 C38_5 H38A_5 104.8 . . ?
C39A_5 C38_5 H38B_5 106.3 . . ?
C6_5 C38_5 H38B_5 106.3 . . ?
C39B_5 C38_5 H38B_5 130.5 . . ?
H38A_5 C38_5 H38B_5 106.4 . . ?
C6_5 C38_5 H38C_5 111.7 . . ?
C39B_5 C38_5 H38C_5 111.7 . . ?
H38A_5 C38_5 H38C_5 119.9 . . ?
C39A_5 C38_5 H38D_5 108.6 . . ?
C6_5 C38_5 H38D_5 111.7 . . ?
C39B_5 C38_5 H38D_5 111.7 . . ?
H38C_5 C38_5 H38D_5 109.4 . . ?
C38_5 C39A_5 C40A_5 105(5) . . ?
C38_5 C39A_5 H39A_5 110.8 . . ?
C40A_5 C39A_5 H39A_5 110.8 . . ?
C38_5 C39A_5 H39B_5 110.8 . . ?
C40A_5 C39A_5 H39B_5 110.8 . . ?
H39A_5 C39A_5 H39B_5 108.9 . . ?
C39A_5 C40A_5 Cl1A_5 110(5) . . ?
C39A_5 C40A_5 H40A_5 109.6 . . ?
Cl1A_5 C40A_5 H40A_5 109.6 . . ?
C39A_5 C40A_5 H40B_5 109.6 . . ?
Cl1A_5 C40A_5 H40B_5 109.6 . . ?
H40A_5 C40A_5 H40B_5 108.1 . . ?
C40B_5 C39B_5 C38_5 107(7) . . ?
C40B_5 C39B_5 H39C_5 110.2 . . ?
C38_5 C39B_5 H39C_5 110.2 . . ?
C40B_5 C39B_5 H39D_5 110.2 . . ?
C38_5 C39B_5 H39D_5 110.2 . . ?
H39C_5 C39B_5 H39D_5 108.5 . . ?
C39B_5 C40B_5 Cl1B_5 116(8) . . ?
C39B_5 C40B_5 H40C_5 108.2 . . ?
Cl1B_5 C40B_5 H40C_5 108.2 . . ?
C39B_5 C40B_5 H40D_5 108.2 . . ?
Cl1B_5 C40B_5 H40D_5 108.2 . . ?
H40C_5 C40B_5 H40D_5 107.3 . . ?
C22_5 C41_5 C42_5 112(3) . . ?
C22_5 C41_5 H41A_5 109.2 . . ?
C42_5 C41_5 H41A_5 109.2 . . ?
C22_5 C41_5 H41B_5 109.2 . . ?
C42_5 C41_5 H41B_5 109.2 . . ?
H41A_5 C41_5 H41B_5 107.9 . . ?
C43_5 C42_5 C41_5 115(3) . . ?
C43_5 C42_5 H42A_5 108.6 . . ?
C41_5 C42_5 H42A_5 108.6 . . ?
C43_5 C42_5 H42B_5 108.6 . . ?
C41_5 C42_5 H42B_5 108.6 . . ?
H42A_5 C42_5 H42B_5 107.5 . . ?
C42_5 C43_5 Cl2_5 112(2) . . ?
C42_5 C43_5 H43A_5 109.1 . . ?
Cl2_5 C43_5 H43A_5 109.1 . . ?
C42_5 C43_5 H43B_5 109.1 . . ?
Cl2_5 C43_5 H43B_5 109.1 . . ?
H43A_5 C43_5 H43B_5 107.8 . . ?
O1_6 C1_6 C5_6 127(3) . . ?
O1_6 C1_6 C2_6 127(3) . . ?
C5_6 C1_6 C2_6 106(2) . . ?
C6_6 C2_6 C3_6 123(3) . . ?
C6_6 C2_6 C1_6 128(3) . . ?
C3_6 C2_6 C1_6 109(3) . . ?
C2_6 C3_6 C21_6 119(3) . . ?
C2_6 C3_6 C4_6 108(2) . . ?
C21_6 C3_6 C4_6 133(3) . . ?
C5_6 C4_6 C37_6 119(3) . . ?
C5_6 C4_6 C3_6 107(2) . . ?
C37_6 C4_6 C3_6 134(3) . . ?
C22_6 C5_6 C4_6 123(3) . . ?
C22_6 C5_6 C1_6 128(3) . . ?
C4_6 C5_6 C1_6 109(3) . . ?
C7_6 C6_6 C2_6 117(3) . . ?
C7_6 C6_6 C38_6 120(3) . . ?
C2_6 C6_6 C38_6 123(3) . . ?
C6_6 C7_6 C8_6 122(3) . . ?
C6_6 C7_6 H7_6 118.8 . . ?
C8_6 C7_6 H7_6 118.8 . . ?
C7_6 C8_6 C21_6 120(3) . . ?
C7_6 C8_6 C9_6 121(3) . . ?
C21_6 C8_6 C9_6 119(3) . . ?
C10_6 C9_6 C14_6 118(3) . . ?
C10_6 C9_6 C8_6 122(3) . . ?
C14_6 C9_6 C8_6 120(3) . . ?
C11_6 C10_6 C9_6 122(3) . . ?
C11_6 C10_6 H10_6 119.0 . . ?
C9_6 C10_6 H10_6 119.0 . . ?
C10_6 C11_6 C12_6 120(3) . . ?
C10_6 C11_6 H11_6 120.2 . . ?
C12_6 C11_6 H11_6 120.2 . . ?
C13_6 C12_6 C11_6 120(3) . . ?
C13_6 C12_6 H12_6 120.0 . . ?
C11_6 C12_6 H12_6 120.0 . . ?
C12_6 C13_6 C14_6 121(4) . . ?
C12_6 C13_6 H13_6 119.3 . . ?
C14_6 C13_6 H13_6 119.3 . . ?
C13_6 C14_6 C9_6 119(3) . . ?
C13_6 C14_6 C15_6 122(3) . . ?
C9_6 C14_6 C15_6 120(3) . . ?
C16_6 C15_6 C20_6 119(3) . . ?
C16_6 C15_6 C14_6 122(3) . . ?
C20_6 C15_6 C14_6 120(3) . . ?
C17_6 C16_6 C15_6 121(3) . . ?
C17_6 C16_6 H16_6 119.3 . . ?
C15_6 C16_6 H16_6 119.3 . . ?
C16_6 C17_6 C18_6 120(3) . . ?
C16_6 C17_6 H17_6 120.0 . . ?
C18_6 C17_6 H17_6 120.0 . . ?
C19_6 C18_6 C17_6 120(3) . . ?
C19_6 C18_6 H18_6 119.9 . . ?
C17_6 C18_6 H18_6 119.9 . . ?
C18_6 C19_6 C20_6 121(3) . . ?
C18_6 C19_6 H19_6 119.3 . . ?
C20_6 C19_6 H19_6 119.3 . . ?
C19_6 C20_6 C15_6 118(3) . . ?
C19_6 C20_6 C21_6 122(3) . . ?
C15_6 C20_6 C21_6 120(3) . . ?
C3_6 C21_6 C8_6 117(3) . . ?
C3_6 C21_6 C20_6 125(3) . . ?
C8_6 C21_6 C20_6 118(3) . . ?
C23_6 C22_6 C5_6 116(3) . . ?
C23_6 C22_6 C41_6 121(3) . . ?
C5_6 C22_6 C41_6 123(3) . . ?
C22_6 C23_6 C24_6 123(3) . . ?
C22_6 C23_6 H23_6 118.4 . . ?
C24_6 C23_6 H23_6 118.4 . . ?
C23_6 C24_6 C37_6 120(3) . . ?
C23_6 C24_6 C25_6 121(3) . . ?
C37_6 C24_6 C25_6 120(2) . . ?
C26_6 C25_6 C30_6 119(3) . . ?
C26_6 C25_6 C24_6 121(3) . . ?
C30_6 C25_6 C24_6 119(3) . . ?
C27_6 C26_6 C25_6 122(3) . . ?
C27_6 C26_6 H26_6 119.2 . . ?
C25_6 C26_6 H26_6 119.2 . . ?
C26_6 C27_6 C28_6 120(3) . . ?
C26_6 C27_6 H27_6 120.0 . . ?
C28_6 C27_6 H27_6 120.0 . . ?
C29_6 C28_6 C27_6 120(3) . . ?
C29_6 C28_6 H28_6 120.0 . . ?
C27_6 C28_6 H28_6 120.0 . . ?
C28_6 C29_6 C30_6 121(3) . . ?
C28_6 C29_6 H29_6 119.5 . . ?
C30_6 C29_6 H29_6 119.5 . . ?
C29_6 C30_6 C25_6 118(3) . . ?
C29_6 C30_6 C31_6 123(3) . . ?
C25_6 C30_6 C31_6 119(3) . . ?
C36_6 C31_6 C32_6 118(3) . . ?
C36_6 C31_6 C30_6 121(2) . . ?
C32_6 C31_6 C30_6 121(3) . . ?
C33_6 C32_6 C31_6 121(3) . . ?
C33_6 C32_6 H32_6 119.5 . . ?
C31_6 C32_6 H32_6 119.5 . . ?
C32_6 C33_6 C34_6 120(3) . . ?
C32_6 C33_6 H33_6 119.9 . . ?
C34_6 C33_6 H33_6 119.9 . . ?
C35_6 C34_6 C33_6 119(3) . . ?
C35_6 C34_6 H34_6 120.3 . . ?
C33_6 C34_6 H34_6 120.3 . . ?
C34_6 C35_6 C36_6 122(3) . . ?
C34_6 C35_6 H35_6 119.1 . . ?
C36_6 C35_6 H35_6 119.1 . . ?
C35_6 C36_6 C31_6 119(3) . . ?
C35_6 C36_6 C37_6 121(3) . . ?
C31_6 C36_6 C37_6 120(3) . . ?
C4_6 C37_6 C24_6 117(2) . . ?
C4_6 C37_6 C36_6 126(3) . . ?
C24_6 C37_6 C36_6 117(2) . . ?
C6_6 C38_6 C39_6 111(3) . . ?
C6_6 C38_6 H38A_6 109.4 . . ?
C39_6 C38_6 H38A_6 109.4 . . ?
C6_6 C38_6 H38B_6 109.4 . . ?
C39_6 C38_6 H38B_6 109.4 . . ?
H38A_6 C38_6 H38B_6 108.0 . . ?
C40_6 C39_6 C38_6 113(4) . . ?
C40_6 C39_6 H39A_6 109.0 . . ?
C38_6 C39_6 H39A_6 109.0 . . ?
C40_6 C39_6 H39B_6 109.0 . . ?
C38_6 C39_6 H39B_6 109.0 . . ?
H39A_6 C39_6 H39B_6 107.8 . . ?
C39_6 C40_6 Cl1A_6 115(4) . . ?
C39_6 C40_6 Cl1B_6 100(4) . . ?
C39_6 C40_6 H40A_6 108.5 . . ?
Cl1A_6 C40_6 H40A_6 108.5 . . ?
C39_6 C40_6 H40B_6 108.5 . . ?
Cl1A_6 C40_6 H40B_6 108.5 . . ?
H40A_6 C40_6 H40B_6 107.5 . . ?
C39_6 C40_6 H40C_6 111.8 . . ?
Cl1B_6 C40_6 H40C_6 111.8 . . ?
C39_6 C40_6 H40D_6 111.8 . . ?
Cl1B_6 C40_6 H40D_6 111.8 . . ?
H40C_6 C40_6 H40D_6 109.5 . . ?
C22_6 C41_6 C42_6 112(2) . . ?
C22_6 C41_6 H41A_6 109.3 . . ?
C42_6 C41_6 H41A_6 109.3 . . ?
C22_6 C41_6 H41B_6 109.3 . . ?
C42_6 C41_6 H41B_6 109.3 . . ?
H41A_6 C41_6 H41B_6 107.9 . . ?
C43_6 C42_6 C41_6 115(3) . . ?
C43_6 C42_6 H42A_6 108.5 . . ?
C41_6 C42_6 H42A_6 108.5 . . ?
C43_6 C42_6 H42B_6 108.5 . . ?
C41_6 C42_6 H42B_6 108.5 . . ?
H42A_6 C42_6 H42B_6 107.5 . . ?
C42_6 C43_6 Cl2_6 113(2) . . ?
C42_6 C43_6 H43A_6 109.0 . . ?
Cl2_6 C43_6 H43A_6 109.0 . . ?
C42_6 C43_6 H43B_6 109.0 . . ?
Cl2_6 C43_6 H43B_6 109.0 . . ?
H43A_6 C43_6 H43B_6 107.8 . . ?
 
loop_
 _geom_torsion_atom_site_label_1
 _geom_torsion_atom_site_label_2
 _geom_torsion_atom_site_label_3
 _geom_torsion_atom_site_label_4
 _geom_torsion
 _geom_torsion_site_symmetry_1
 _geom_torsion_site_symmetry_2
 _geom_torsion_site_symmetry_3
 _geom_torsion_site_symmetry_4
 _geom_torsion_publ_flag
O1_1 C1_1 C2_1 C6_1 0(5) . . . . ?
C5_1 C1_1 C2_1 C6_1 179(3) . . . . ?
O1_1 C1_1 C2_1 C3_1 -173(3) . . . . ?
C5_1 C1_1 C2_1 C3_1 6(3) . . . . ?
C6_1 C2_1 C3_1 C21_1 -10(4) . . . . ?
C1_1 C2_1 C3_1 C21_1 163(2) . . . . ?
C6_1 C2_1 C3_1 C4_1 173(3) . . . . ?
C1_1 C2_1 C3_1 C4_1 -13(3) . . . . ?
C2_1 C3_1 C4_1 C5_1 16(3) . . . . ?
C21_1 C3_1 C4_1 C5_1 -160(3) . . . . ?
C2_1 C3_1 C4_1 C37_1 -160(3) . . . . ?
C21_1 C3_1 C4_1 C37_1 25(5) . . . . ?
C37_1 C4_1 C5_1 C22_1 -10(4) . . . . ?
C3_1 C4_1 C5_1 C22_1 174(3) . . . . ?
C37_1 C4_1 C5_1 C1_1 164(3) . . . . ?
C3_1 C4_1 C5_1 C1_1 -12(3) . . . . ?
O1_1 C1_1 C5_1 C22_1 -3(5) . . . . ?
C2_1 C1_1 C5_1 C22_1 178(3) . . . . ?
O1_1 C1_1 C5_1 C4_1 -177(3) . . . . ?
C2_1 C1_1 C5_1 C4_1 5(3) . . . . ?
C3_1 C2_1 C6_1 C7_1 -1(4) . . . . ?
C1_1 C2_1 C6_1 C7_1 -173(3) . . . . ?
C3_1 C2_1 C6_1 C38_1 -180(3) . . . . ?
C1_1 C2_1 C6_1 C38_1 8(5) . . . . ?
C2_1 C6_1 C7_1 C8_1 6(4) . . . . ?
C38_1 C6_1 C7_1 C8_1 -175(3) . . . . ?
C6_1 C7_1 C8_1 C21_1 0(4) . . . . ?
C6_1 C7_1 C8_1 C9_1 -177(3) . . . . ?
C7_1 C8_1 C9_1 C14_1 178(3) . . . . ?
C21_1 C8_1 C9_1 C14_1 0(4) . . . . ?
C7_1 C8_1 C9_1 C10_1 3(4) . . . . ?
C21_1 C8_1 C9_1 C10_1 -174(3) . . . . ?
C14_1 C9_1 C10_1 C11_1 -3(4) . . . . ?
C8_1 C9_1 C10_1 C11_1 172(3) . . . . ?
C9_1 C10_1 C11_1 C12_1 -1(5) . . . . ?
C10_1 C11_1 C12_1 C13_1 4(5) . . . . ?
C11_1 C12_1 C13_1 C14_1 -3(5) . . . . ?
C10_1 C9_1 C14_1 C13_1 5(4) . . . . ?
C8_1 C9_1 C14_1 C13_1 -171(3) . . . . ?
C10_1 C9_1 C14_1 C15_1 -171(3) . . . . ?
C8_1 C9_1 C14_1 C15_1 14(4) . . . . ?
C12_1 C13_1 C14_1 C9_1 -2(5) . . . . ?
C12_1 C13_1 C14_1 C15_1 174(3) . . . . ?
C9_1 C14_1 C15_1 C16_1 164(3) . . . . ?
C13_1 C14_1 C15_1 C16_1 -11(5) . . . . ?
C9_1 C14_1 C15_1 C20_1 -11(4) . . . . ?
C13_1 C14_1 C15_1 C20_1 173(3) . . . . ?
C20_1 C15_1 C16_1 C17_1 2(5) . . . . ?
C14_1 C15_1 C16_1 C17_1 -174(3) . . . . ?
C15_1 C16_1 C17_1 C18_1 2(5) . . . . ?
C16_1 C17_1 C18_1 C19_1 -2(5) . . . . ?
C17_1 C18_1 C19_1 C20_1 -1(5) . . . . ?
C16_1 C15_1 C20_1 C19_1 -5(4) . . . . ?
C14_1 C15_1 C20_1 C19_1 171(3) . . . . ?
C16_1 C15_1 C20_1 C21_1 179(3) . . . . ?
C14_1 C15_1 C20_1 C21_1 -6(4) . . . . ?
C18_1 C19_1 C20_1 C15_1 5(4) . . . . ?
C18_1 C19_1 C20_1 C21_1 -179(3) . . . . ?
C2_1 C3_1 C21_1 C8_1 17(4) . . . . ?
C4_1 C3_1 C21_1 C8_1 -168(3) . . . . ?
C2_1 C3_1 C21_1 C20_1 -161(3) . . . . ?
C4_1 C3_1 C21_1 C20_1 14(5) . . . . ?
C7_1 C8_1 C21_1 C3_1 -12(4) . . . . ?
C9_1 C8_1 C21_1 C3_1 165(2) . . . . ?
C7_1 C8_1 C21_1 C20_1 166(3) . . . . ?
C9_1 C8_1 C21_1 C20_1 -17(4) . . . . ?
C15_1 C20_1 C21_1 C3_1 -163(3) . . . . ?
C19_1 C20_1 C21_1 C3_1 21(4) . . . . ?
C15_1 C20_1 C21_1 C8_1 20(4) . . . . ?
C19_1 C20_1 C21_1 C8_1 -157(3) . . . . ?
C4_1 C5_1 C22_1 C23_1 -4(4) . . . . ?
C1_1 C5_1 C22_1 C23_1 -176(3) . . . . ?
C4_1 C5_1 C22_1 C41_1 -178(3) . . . . ?
C1_1 C5_1 C22_1 C41_1 10(5) . . . . ?
C5_1 C22_1 C23_1 C24_1 8(5) . . . . ?
C41_1 C22_1 C23_1 C24_1 -177(3) . . . . ?
C22_1 C23_1 C24_1 C37_1 1(5) . . . . ?
C22_1 C23_1 C24_1 C25_1 -177(3) . . . . ?
C23_1 C24_1 C25_1 C26_1 11(4) . . . . ?
C37_1 C24_1 C25_1 C26_1 -167(3) . . . . ?
C23_1 C24_1 C25_1 C30_1 -172(3) . . . . ?
C37_1 C24_1 C25_1 C30_1 10(4) . . . . ?
C30_1 C25_1 C26_1 C27_1 -1(5) . . . . ?
C24_1 C25_1 C26_1 C27_1 176(3) . . . . ?
C25_1 C26_1 C27_1 C28_1 -1(5) . . . . ?
C26_1 C27_1 C28_1 C29_1 2(5) . . . . ?
C27_1 C28_1 C29_1 C30_1 -1(5) . . . . ?
C28_1 C29_1 C30_1 C25_1 -1(5) . . . . ?
C28_1 C29_1 C30_1 C31_1 179(3) . . . . ?
C26_1 C25_1 C30_1 C29_1 2(4) . . . . ?
C24_1 C25_1 C30_1 C29_1 -175(3) . . . . ?
C26_1 C25_1 C30_1 C31_1 -178(3) . . . . ?
C24_1 C25_1 C30_1 C31_1 5(4) . . . . ?
C29_1 C30_1 C31_1 C36_1 170(3) . . . . ?
C25_1 C30_1 C31_1 C36_1 -10(4) . . . . ?
C29_1 C30_1 C31_1 C32_1 -11(4) . . . . ?
C25_1 C30_1 C31_1 C32_1 169(3) . . . . ?
C36_1 C31_1 C32_1 C33_1 -1(4) . . . . ?
C30_1 C31_1 C32_1 C33_1 -180(3) . . . . ?
C31_1 C32_1 C33_1 C34_1 3(5) . . . . ?
C32_1 C33_1 C34_1 C35_1 -2(5) . . . . ?
C33_1 C34_1 C35_1 C36_1 -3(5) . . . . ?
C34_1 C35_1 C36_1 C31_1 6(4) . . . . ?
C34_1 C35_1 C36_1 C37_1 -179(3) . . . . ?
C32_1 C31_1 C36_1 C35_1 -4(4) . . . . ?
C30_1 C31_1 C36_1 C35_1 175(3) . . . . ?
C32_1 C31_1 C36_1 C37_1 -179(2) . . . . ?
C30_1 C31_1 C36_1 C37_1 0(4) . . . . ?
C5_1 C4_1 C37_1 C24_1 18(4) . . . . ?
C3_1 C4_1 C37_1 C24_1 -167(3) . . . . ?
C5_1 C4_1 C37_1 C36_1 -158(3) . . . . ?
C3_1 C4_1 C37_1 C36_1 17(5) . . . . ?
C23_1 C24_1 C37_1 C4_1 -14(4) . . . . ?
C25_1 C24_1 C37_1 C4_1 164(3) . . . . ?
C23_1 C24_1 C37_1 C36_1 162(3) . . . . ?
C25_1 C24_1 C37_1 C36_1 -20(4) . . . . ?
C35_1 C36_1 C37_1 C4_1 16(4) . . . . ?
C31_1 C36_1 C37_1 C4_1 -169(3) . . . . ?
C35_1 C36_1 C37_1 C24_1 -160(3) . . . . ?
C31_1 C36_1 C37_1 C24_1 15(4) . . . . ?
C7_1 C6_1 C38_1 C39_1 -101(4) . . . . ?
C2_1 C6_1 C38_1 C39_1 77(4) . . . . ?
C6_1 C38_1 C39_1 C40_1 -170(3) . . . . ?
C38_1 C39_1 C40_1 Cl1A_1 -177(3) . . . . ?
C38_1 C39_1 C40_1 Cl1B_1 -128(6) . . . . ?
C23_1 C22_1 C41_1 C42_1 -101(4) . . . . ?
C5_1 C22_1 C41_1 C42_1 73(4) . . . . ?
C22_1 C41_1 C42_1 C43_1 56(4) . . . . ?
C41_1 C42_1 C43_1 Cl2_1 58(3) . . . . ?
O1_2 C1_2 C2_2 C6_2 -3(5) . . . . ?
C5_2 C1_2 C2_2 C6_2 179(3) . . . . ?
O1_2 C1_2 C2_2 C3_2 -178(3) . . . . ?
C5_2 C1_2 C2_2 C3_2 4(3) . . . . ?
C6_2 C2_2 C3_2 C21_2 -8(4) . . . . ?
C1_2 C2_2 C3_2 C21_2 167(2) . . . . ?
C6_2 C2_2 C3_2 C4_2 174(3) . . . . ?
C1_2 C2_2 C3_2 C4_2 -11(3) . . . . ?
C2_2 C3_2 C4_2 C37_2 -162(3) . . . . ?
C21_2 C3_2 C4_2 C37_2 21(5) . . . . ?
C2_2 C3_2 C4_2 C5_2 14(3) . . . . ?
C21_2 C3_2 C4_2 C5_2 -163(3) . . . . ?
C37_2 C4_2 C5_2 C22_2 -9(4) . . . . ?
C3_2 C4_2 C5_2 C22_2 174(3) . . . . ?
C37_2 C4_2 C5_2 C1_2 165(2) . . . . ?
C3_2 C4_2 C5_2 C1_2 -12(3) . . . . ?
O1_2 C1_2 C5_2 C22_2 1(5) . . . . ?
C2_2 C1_2 C5_2 C22_2 179(3) . . . . ?
O1_2 C1_2 C5_2 C4_2 -173(3) . . . . ?
C2_2 C1_2 C5_2 C4_2 5(3) . . . . ?
C3_2 C2_2 C6_2 C7_2 -3(4) . . . . ?
C1_2 C2_2 C6_2 C7_2 -177(3) . . . . ?
C3_2 C2_2 C6_2 C38_2 -178(3) . . . . ?
C1_2 C2_2 C6_2 C38_2 8(4) . . . . ?
C2_2 C6_2 C7_2 C8_2 5(4) . . . . ?
C38_2 C6_2 C7_2 C8_2 -180(3) . . . . ?
C6_2 C7_2 C8_2 C21_2 4(4) . . . . ?
C6_2 C7_2 C8_2 C9_2 -175(3) . . . . ?
C7_2 C8_2 C9_2 C10_2 12(4) . . . . ?
C21_2 C8_2 C9_2 C10_2 -167(3) . . . . ?
C7_2 C8_2 C9_2 C14_2 -172(3) . . . . ?
C21_2 C8_2 C9_2 C14_2 9(4) . . . . ?
C14_2 C9_2 C10_2 C11_2 -1(5) . . . . ?
C8_2 C9_2 C10_2 C11_2 176(3) . . . . ?
C9_2 C10_2 C11_2 C12_2 0(5) . . . . ?
C10_2 C11_2 C12_2 C13_2 1(5) . . . . ?
C11_2 C12_2 C13_2 C14_2 -1(5) . . . . ?
C12_2 C13_2 C14_2 C9_2 1(5) . . . . ?
C12_2 C13_2 C14_2 C15_2 179(3) . . . . ?
C10_2 C9_2 C14_2 C13_2 0(4) . . . . ?
C8_2 C9_2 C14_2 C13_2 -176(3) . . . . ?
C10_2 C9_2 C14_2 C15_2 -178(3) . . . . ?
C8_2 C9_2 C14_2 C15_2 6(4) . . . . ?
C13_2 C14_2 C15_2 C16_2 -8(4) . . . . ?
C9_2 C14_2 C15_2 C16_2 170(3) . . . . ?
C13_2 C14_2 C15_2 C20_2 172(3) . . . . ?
C9_2 C14_2 C15_2 C20_2 -10(4) . . . . ?
C20_2 C15_2 C16_2 C17_2 0(4) . . . . ?
C14_2 C15_2 C16_2 C17_2 -179(3) . . . . ?
C15_2 C16_2 C17_2 C18_2 3(5) . . . . ?
C16_2 C17_2 C18_2 C19_2 -2(5) . . . . ?
C17_2 C18_2 C19_2 C20_2 -3(4) . . . . ?
C18_2 C19_2 C20_2 C15_2 7(4) . . . . ?
C18_2 C19_2 C20_2 C21_2 -178(3) . . . . ?
C16_2 C15_2 C20_2 C19_2 -5(4) . . . . ?
C14_2 C15_2 C20_2 C19_2 175(3) . . . . ?
C16_2 C15_2 C20_2 C21_2 180(3) . . . . ?
C14_2 C15_2 C20_2 C21_2 0(4) . . . . ?
C2_2 C3_2 C21_2 C8_2 17(4) . . . . ?
C4_2 C3_2 C21_2 C8_2 -166(3) . . . . ?
C2_2 C3_2 C21_2 C20_2 -160(3) . . . . ?
C4_2 C3_2 C21_2 C20_2 17(5) . . . . ?
C7_2 C8_2 C21_2 C3_2 -15(4) . . . . ?
C9_2 C8_2 C21_2 C3_2 164(3) . . . . ?
C7_2 C8_2 C21_2 C20_2 162(2) . . . . ?
C9_2 C8_2 C21_2 C20_2 -19(4) . . . . ?
C19_2 C20_2 C21_2 C3_2 17(4) . . . . ?
C15_2 C20_2 C21_2 C3_2 -168(3) . . . . ?
C19_2 C20_2 C21_2 C8_2 -160(3) . . . . ?
C15_2 C20_2 C21_2 C8_2 15(4) . . . . ?
C4_2 C5_2 C22_2 C23_2 -4(4) . . . . ?
C1_2 C5_2 C22_2 C23_2 -176(3) . . . . ?
C4_2 C5_2 C22_2 C41_2 177(3) . . . . ?
C1_2 C5_2 C22_2 C41_2 4(5) . . . . ?
C5_2 C22_2 C23_2 C24_2 7(5) . . . . ?
C41_2 C22_2 C23_2 C24_2 -173(3) . . . . ?
C22_2 C23_2 C24_2 C37_2 1(5) . . . . ?
C22_2 C23_2 C24_2 C25_2 -175(3) . . . . ?
C23_2 C24_2 C25_2 C26_2 8(4) . . . . ?
C37_2 C24_2 C25_2 C26_2 -169(3) . . . . ?
C23_2 C24_2 C25_2 C30_2 -176(3) . . . . ?
C37_2 C24_2 C25_2 C30_2 7(4) . . . . ?
C30_2 C25_2 C26_2 C27_2 -3(4) . . . . ?
C24_2 C25_2 C26_2 C27_2 173(3) . . . . ?
C25_2 C26_2 C27_2 C28_2 -1(5) . . . . ?
C26_2 C27_2 C28_2 C29_2 3(5) . . . . ?
C27_2 C28_2 C29_2 C30_2 -2(6) . . . . ?
C28_2 C29_2 C30_2 C25_2 -2(5) . . . . ?
C28_2 C29_2 C30_2 C31_2 177(3) . . . . ?
C26_2 C25_2 C30_2 C29_2 5(4) . . . . ?
C24_2 C25_2 C30_2 C29_2 -172(3) . . . . ?
C26_2 C25_2 C30_2 C31_2 -175(3) . . . . ?
C24_2 C25_2 C30_2 C31_2 9(4) . . . . ?
C29_2 C30_2 C31_2 C32_2 -14(5) . . . . ?
C25_2 C30_2 C31_2 C32_2 165(3) . . . . ?
C29_2 C30_2 C31_2 C36_2 169(3) . . . . ?
C25_2 C30_2 C31_2 C36_2 -12(4) . . . . ?
C36_2 C31_2 C32_2 C33_2 0(5) . . . . ?
C30_2 C31_2 C32_2 C33_2 -177(3) . . . . ?
C31_2 C32_2 C33_2 C34_2 2(5) . . . . ?
C32_2 C33_2 C34_2 C35_2 0(5) . . . . ?
C33_2 C34_2 C35_2 C36_2 -3(5) . . . . ?
C34_2 C35_2 C36_2 C31_2 5(4) . . . . ?
C34_2 C35_2 C36_2 C37_2 -180(3) . . . . ?
C32_2 C31_2 C36_2 C35_2 -3(4) . . . . ?
C30_2 C31_2 C36_2 C35_2 174(3) . . . . ?
C32_2 C31_2 C36_2 C37_2 -178(3) . . . . ?
C30_2 C31_2 C36_2 C37_2 -1(4) . . . . ?
C5_2 C4_2 C37_2 C24_2 17(4) . . . . ?
C3_2 C4_2 C37_2 C24_2 -167(3) . . . . ?
C5_2 C4_2 C37_2 C36_2 -159(3) . . . . ?
C3_2 C4_2 C37_2 C36_2 16(5) . . . . ?
C23_2 C24_2 C37_2 C4_2 -14(4) . . . . ?
C25_2 C24_2 C37_2 C4_2 163(2) . . . . ?
C23_2 C24_2 C37_2 C36_2 163(3) . . . . ?
C25_2 C24_2 C37_2 C36_2 -20(4) . . . . ?
C35_2 C36_2 C37_2 C4_2 18(4) . . . . ?
C31_2 C36_2 C37_2 C4_2 -166(3) . . . . ?
C35_2 C36_2 C37_2 C24_2 -158(3) . . . . ?
C31_2 C36_2 C37_2 C24_2 18(4) . . . . ?
C7_2 C6_2 C38_2 C39_2 -98(3) . . . . ?
C2_2 C6_2 C38_2 C39_2 76(4) . . . . ?
C6_2 C38_2 C39_2 C40_2 56(3) . . . . ?
C38_2 C39_2 C40_2 Cl1_2 62(3) . . . . ?
C23_2 C22_2 C41_2 C42_2 -105(4) . . . . ?
C5_2 C22_2 C41_2 C42_2 75(4) . . . . ?
C22_2 C41_2 C42_2 C43B_2 48(6) . . . . ?
C22_2 C41_2 C42_2 C43A_2 74(4) . . . . ?
C43B_2 C42_2 C43A_2 Cl2A_2 -83(23) . . . . ?
C41_2 C42_2 C43A_2 Cl2A_2 174(3) . . . . ?
C43A_2 C42_2 C43B_2 Cl2B_2 4(12) . . . . ?
C41_2 C42_2 C43B_2 Cl2B_2 90(12) . . . . ?
O1_3 C1_3 C2_3 C6_3 3(5) . . . . ?
C5_3 C1_3 C2_3 C6_3 -179(3) . . . . ?
O1_3 C1_3 C2_3 C3_3 -173(3) . . . . ?
C5_3 C1_3 C2_3 C3_3 6(3) . . . . ?
C6_3 C2_3 C3_3 C21_3 -14(4) . . . . ?
C1_3 C2_3 C3_3 C21_3 162(2) . . . . ?
C6_3 C2_3 C3_3 C4_3 170(3) . . . . ?
C1_3 C2_3 C3_3 C4_3 -14(3) . . . . ?
C2_3 C3_3 C4_3 C5_3 17(3) . . . . ?
C21_3 C3_3 C4_3 C5_3 -158(3) . . . . ?
C2_3 C3_3 C4_3 C37_3 -157(3) . . . . ?
C21_3 C3_3 C4_3 C37_3 28(5) . . . . ?
C37_3 C4_3 C5_3 C22_3 -12(4) . . . . ?
C3_3 C4_3 C5_3 C22_3 173(3) . . . . ?
C37_3 C4_3 C5_3 C1_3 162(2) . . . . ?
C3_3 C4_3 C5_3 C1_3 -13(3) . . . . ?
O1_3 C1_3 C5_3 C4_3 -176(3) . . . . ?
C2_3 C1_3 C5_3 C4_3 5(3) . . . . ?
O1_3 C1_3 C5_3 C22_3 -2(5) . . . . ?
C2_3 C1_3 C5_3 C22_3 179(3) . . . . ?
C3_3 C2_3 C6_3 C7_3 2(4) . . . . ?
C1_3 C2_3 C6_3 C7_3 -172(3) . . . . ?
C3_3 C2_3 C6_3 C38_3 -176(3) . . . . ?
C1_3 C2_3 C6_3 C38_3 10(5) . . . . ?
C2_3 C6_3 C7_3 C8_3 6(4) . . . . ?
C38_3 C6_3 C7_3 C8_3 -176(3) . . . . ?
C6_3 C7_3 C8_3 C21_3 -3(4) . . . . ?
C6_3 C7_3 C8_3 C9_3 180(3) . . . . ?
C7_3 C8_3 C9_3 C14_3 175(3) . . . . ?
C21_3 C8_3 C9_3 C14_3 -2(4) . . . . ?
C7_3 C8_3 C9_3 C10_3 -2(4) . . . . ?
C21_3 C8_3 C9_3 C10_3 -180(3) . . . . ?
C14_3 C9_3 C10_3 C11_3 -4(4) . . . . ?
C8_3 C9_3 C10_3 C11_3 173(3) . . . . ?
C9_3 C10_3 C11_3 C12_3 1(5) . . . . ?
C10_3 C11_3 C12_3 C13_3 2(6) . . . . ?
C11_3 C12_3 C13_3 C14_3 -1(6) . . . . ?
C12_3 C13_3 C14_3 C9_3 -2(5) . . . . ?
C12_3 C13_3 C14_3 C15_3 173(3) . . . . ?
C10_3 C9_3 C14_3 C13_3 5(4) . . . . ?
C8_3 C9_3 C14_3 C13_3 -172(3) . . . . ?
C10_3 C9_3 C14_3 C15_3 -171(3) . . . . ?
C8_3 C9_3 C14_3 C15_3 12(4) . . . . ?
C13_3 C14_3 C15_3 C16_3 -7(5) . . . . ?
C9_3 C14_3 C15_3 C16_3 169(3) . . . . ?
C13_3 C14_3 C15_3 C20_3 179(3) . . . . ?
C9_3 C14_3 C15_3 C20_3 -6(4) . . . . ?
C20_3 C15_3 C16_3 C17_3 3(5) . . . . ?
C14_3 C15_3 C16_3 C17_3 -172(3) . . . . ?
C15_3 C16_3 C17_3 C18_3 1(5) . . . . ?
C16_3 C17_3 C18_3 C19_3 -2(5) . . . . ?
C17_3 C18_3 C19_3 C20_3 -2(5) . . . . ?
C16_3 C15_3 C20_3 C19_3 -6(4) . . . . ?
C14_3 C15_3 C20_3 C19_3 168(3) . . . . ?
C16_3 C15_3 C20_3 C21_3 176(3) . . . . ?
C14_3 C15_3 C20_3 C21_3 -10(4) . . . . ?
C18_3 C19_3 C20_3 C15_3 6(4) . . . . ?
C18_3 C19_3 C20_3 C21_3 -176(3) . . . . ?
C2_3 C3_3 C21_3 C8_3 17(4) . . . . ?
C4_3 C3_3 C21_3 C8_3 -169(3) . . . . ?
C2_3 C3_3 C21_3 C20_3 -162(3) . . . . ?
C4_3 C3_3 C21_3 C20_3 13(5) . . . . ?
C7_3 C8_3 C21_3 C3_3 -9(4) . . . . ?
C9_3 C8_3 C21_3 C3_3 169(2) . . . . ?
C7_3 C8_3 C21_3 C20_3 170(3) . . . . ?
C9_3 C8_3 C21_3 C20_3 -13(4) . . . . ?
C15_3 C20_3 C21_3 C3_3 -162(3) . . . . ?
C19_3 C20_3 C21_3 C3_3 20(4) . . . . ?
C15_3 C20_3 C21_3 C8_3 19(4) . . . . ?
C19_3 C20_3 C21_3 C8_3 -159(3) . . . . ?
C4_3 C5_3 C22_3 C23_3 0(4) . . . . ?
C1_3 C5_3 C22_3 C23_3 -173(3) . . . . ?
C4_3 C5_3 C22_3 C41_3 -176(3) . . . . ?
C1_3 C5_3 C22_3 C41_3 11(5) . . . . ?
C5_3 C22_3 C23_3 C24_3 6(4) . . . . ?
C41_3 C22_3 C23_3 C24_3 -177(3) . . . . ?
C22_3 C23_3 C24_3 C37_3 0(4) . . . . ?
C22_3 C23_3 C24_3 C25_3 -179(3) . . . . ?
C23_3 C24_3 C25_3 C30_3 -175(2) . . . . ?
C37_3 C24_3 C25_3 C30_3 6(4) . . . . ?
C23_3 C24_3 C25_3 C26_3 8(4) . . . . ?
C37_3 C24_3 C25_3 C26_3 -170(3) . . . . ?
C30_3 C25_3 C26_3 C27_3 0(4) . . . . ?
C24_3 C25_3 C26_3 C27_3 177(3) . . . . ?
C25_3 C26_3 C27_3 C28_3 -1(5) . . . . ?
C26_3 C27_3 C28_3 C29_3 1(5) . . . . ?
C27_3 C28_3 C29_3 C30_3 -1(5) . . . . ?
C26_3 C25_3 C30_3 C29_3 1(4) . . . . ?
C24_3 C25_3 C30_3 C29_3 -176(3) . . . . ?
C26_3 C25_3 C30_3 C31_3 -177(3) . . . . ?
C24_3 C25_3 C30_3 C31_3 6(4) . . . . ?
C28_3 C29_3 C30_3 C25_3 0(4) . . . . ?
C28_3 C29_3 C30_3 C31_3 177(3) . . . . ?
C25_3 C30_3 C31_3 C32_3 170(3) . . . . ?
C29_3 C30_3 C31_3 C32_3 -8(4) . . . . ?
C25_3 C30_3 C31_3 C36_3 -8(4) . . . . ?
C29_3 C30_3 C31_3 C36_3 174(3) . . . . ?
C36_3 C31_3 C32_3 C33_3 -1(4) . . . . ?
C30_3 C31_3 C32_3 C33_3 -179(3) . . . . ?
C31_3 C32_3 C33_3 C34_3 4(4) . . . . ?
C32_3 C33_3 C34_3 C35_3 -2(4) . . . . ?
C33_3 C34_3 C35_3 C36_3 -3(4) . . . . ?
C34_3 C35_3 C36_3 C31_3 7(4) . . . . ?
C34_3 C35_3 C36_3 C37_3 -177(3) . . . . ?
C32_3 C31_3 C36_3 C35_3 -5(4) . . . . ?
C30_3 C31_3 C36_3 C35_3 174(2) . . . . ?
C32_3 C31_3 C36_3 C37_3 179(2) . . . . ?
C30_3 C31_3 C36_3 C37_3 -2(4) . . . . ?
C23_3 C24_3 C37_3 C4_3 -11(4) . . . . ?
C25_3 C24_3 C37_3 C4_3 167(2) . . . . ?
C23_3 C24_3 C37_3 C36_3 165(3) . . . . ?
C25_3 C24_3 C37_3 C36_3 -17(4) . . . . ?
C5_3 C4_3 C37_3 C24_3 17(4) . . . . ?
C3_3 C4_3 C37_3 C24_3 -169(3) . . . . ?
C5_3 C4_3 C37_3 C36_3 -159(3) . . . . ?
C3_3 C4_3 C37_3 C36_3 15(5) . . . . ?
C35_3 C36_3 C37_3 C24_3 -161(3) . . . . ?
C31_3 C36_3 C37_3 C24_3 15(4) . . . . ?
C35_3 C36_3 C37_3 C4_3 15(4) . . . . ?
C31_3 C36_3 C37_3 C4_3 -169(3) . . . . ?
C7_3 C6_3 C38_3 C39C_3 -100(8) . . . . ?
C2_3 C6_3 C38_3 C39C_3 78(8) . . . . ?
C7_3 C6_3 C38_3 C39A_3 -59(4) . . . . ?
C2_3 C6_3 C38_3 C39A_3 119(4) . . . . ?
C6_3 C38_3 C39A_3 C40A_3 -176(4) . . . . ?
C39C_3 C38_3 C39A_3 C40A_3 -78(8) . . . . ?
C38_3 C39A_3 C40A_3 Cl1A_3 68(5) . . . . ?
C6_3 C38_3 C39C_3 C40C_3 178(8) . . . . ?
C39A_3 C38_3 C39C_3 C40C_3 80(9) . . . . ?
C38_3 C39C_3 C40C_3 Cl1C_3 -157(10) . . . . ?
C23_3 C22_3 C41_3 C42_3 -102(3) . . . . ?
C5_3 C22_3 C41_3 C42_3 74(4) . . . . ?
C22_3 C41_3 C42_3 C43_3 62(4) . . . . ?
C41_3 C42_3 C43_3 Cl2_3 60(3) . . . . ?
O1_4 C1_4 C2_4 C3_4 -177(3) . . . . ?
C5_4 C1_4 C2_4 C3_4 5(3) . . . . ?
O1_4 C1_4 C2_4 C6_4 -3(5) . . . . ?
C5_4 C1_4 C2_4 C6_4 178(3) . . . . ?
C6_4 C2_4 C3_4 C21_4 -11(4) . . . . ?
C1_4 C2_4 C3_4 C21_4 163(2) . . . . ?
C6_4 C2_4 C3_4 C4_4 173(3) . . . . ?
C1_4 C2_4 C3_4 C4_4 -13(3) . . . . ?
C2_4 C3_4 C4_4 C37_4 -157(3) . . . . ?
C21_4 C3_4 C4_4 C37_4 27(5) . . . . ?
C2_4 C3_4 C4_4 C5_4 17(3) . . . . ?
C21_4 C3_4 C4_4 C5_4 -158(3) . . . . ?
C37_4 C4_4 C5_4 C22_4 -13(4) . . . . ?
C3_4 C4_4 C5_4 C22_4 171(3) . . . . ?
C37_4 C4_4 C5_4 C1_4 161(2) . . . . ?
C3_4 C4_4 C5_4 C1_4 -14(3) . . . . ?
O1_4 C1_4 C5_4 C22_4 2(5) . . . . ?
C2_4 C1_4 C5_4 C22_4 -180(3) . . . . ?
O1_4 C1_4 C5_4 C4_4 -172(3) . . . . ?
C2_4 C1_4 C5_4 C4_4 6(3) . . . . ?
C3_4 C2_4 C6_4 C7_4 -2(4) . . . . ?
C1_4 C2_4 C6_4 C7_4 -174(3) . . . . ?
C3_4 C2_4 C6_4 C38_4 -176(3) . . . . ?
C1_4 C2_4 C6_4 C38_4 11(5) . . . . ?
C2_4 C6_4 C7_4 C8_4 8(4) . . . . ?
C38_4 C6_4 C7_4 C8_4 -178(3) . . . . ?
C6_4 C7_4 C8_4 C21_4 -1(4) . . . . ?
C6_4 C7_4 C8_4 C9_4 -178(3) . . . . ?
C7_4 C8_4 C9_4 C14_4 -174(3) . . . . ?
C21_4 C8_4 C9_4 C14_4 9(4) . . . . ?
C7_4 C8_4 C9_4 C10_4 8(4) . . . . ?
C21_4 C8_4 C9_4 C10_4 -169(3) . . . . ?
C14_4 C9_4 C10_4 C11_4 -1(4) . . . . ?
C8_4 C9_4 C10_4 C11_4 177(3) . . . . ?
C9_4 C10_4 C11_4 C12_4 1(5) . . . . ?
C10_4 C11_4 C12_4 C13_4 -1(5) . . . . ?
C11_4 C12_4 C13_4 C14_4 0(5) . . . . ?
C10_4 C9_4 C14_4 C13_4 1(4) . . . . ?
C8_4 C9_4 C14_4 C13_4 -177(3) . . . . ?
C10_4 C9_4 C14_4 C15_4 -178(3) . . . . ?
C8_4 C9_4 C14_4 C15_4 4(4) . . . . ?
C12_4 C13_4 C14_4 C9_4 0(5) . . . . ?
C12_4 C13_4 C14_4 C15_4 178(3) . . . . ?
C9_4 C14_4 C15_4 C20_4 -8(4) . . . . ?
C13_4 C14_4 C15_4 C20_4 174(3) . . . . ?
C9_4 C14_4 C15_4 C16_4 171(3) . . . . ?
C13_4 C14_4 C15_4 C16_4 -8(4) . . . . ?
C20_4 C15_4 C16_4 C17_4 0(4) . . . . ?
C14_4 C15_4 C16_4 C17_4 -179(3) . . . . ?
C15_4 C16_4 C17_4 C18_4 4(4) . . . . ?
C16_4 C17_4 C18_4 C19_4 -2(4) . . . . ?
C17_4 C18_4 C19_4 C20_4 -3(4) . . . . ?
C18_4 C19_4 C20_4 C15_4 7(4) . . . . ?
C18_4 C19_4 C20_4 C21_4 -178(3) . . . . ?
C16_4 C15_4 C20_4 C19_4 -5(4) . . . . ?
C14_4 C15_4 C20_4 C19_4 174(2) . . . . ?
C16_4 C15_4 C20_4 C21_4 180(3) . . . . ?
C14_4 C15_4 C20_4 C21_4 -1(4) . . . . ?
C2_4 C3_4 C21_4 C8_4 17(4) . . . . ?
C4_4 C3_4 C21_4 C8_4 -168(3) . . . . ?
C2_4 C3_4 C21_4 C20_4 -160(3) . . . . ?
C4_4 C3_4 C21_4 C20_4 15(5) . . . . ?
C7_4 C8_4 C21_4 C3_4 -11(4) . . . . ?
C9_4 C8_4 C21_4 C3_4 166(2) . . . . ?
C7_4 C8_4 C21_4 C20_4 165(3) . . . . ?
C9_4 C8_4 C21_4 C20_4 -18(4) . . . . ?
C19_4 C20_4 C21_4 C3_4 15(4) . . . . ?
C15_4 C20_4 C21_4 C3_4 -170(3) . . . . ?
C19_4 C20_4 C21_4 C8_4 -161(3) . . . . ?
C15_4 C20_4 C21_4 C8_4 14(4) . . . . ?
C4_4 C5_4 C22_4 C23_4 1(4) . . . . ?
C1_4 C5_4 C22_4 C23_4 -172(3) . . . . ?
C4_4 C5_4 C22_4 C41_4 -178(3) . . . . ?
C1_4 C5_4 C22_4 C41_4 9(5) . . . . ?
C5_4 C22_4 C23_4 C24_4 7(4) . . . . ?
C41_4 C22_4 C23_4 C24_4 -175(3) . . . . ?
C22_4 C23_4 C24_4 C37_4 -2(4) . . . . ?
C22_4 C23_4 C24_4 C25_4 -180(3) . . . . ?
C23_4 C24_4 C25_4 C26_4 0(4) . . . . ?
C37_4 C24_4 C25_4 C26_4 -178(3) . . . . ?
C23_4 C24_4 C25_4 C30_4 176(3) . . . . ?
C37_4 C24_4 C25_4 C30_4 -2(4) . . . . ?
C30_4 C25_4 C26_4 C27_4 -3(4) . . . . ?
C24_4 C25_4 C26_4 C27_4 173(3) . . . . ?
C25_4 C26_4 C27_4 C28_4 -1(5) . . . . ?
C26_4 C27_4 C28_4 C29_4 3(6) . . . . ?
C27_4 C28_4 C29_4 C30_4 -1(6) . . . . ?
C28_4 C29_4 C30_4 C25_4 -3(5) . . . . ?
C28_4 C29_4 C30_4 C31_4 172(3) . . . . ?
C26_4 C25_4 C30_4 C29_4 5(4) . . . . ?
C24_4 C25_4 C30_4 C29_4 -171(3) . . . . ?
C26_4 C25_4 C30_4 C31_4 -171(3) . . . . ?
C24_4 C25_4 C30_4 C31_4 13(4) . . . . ?
C29_4 C30_4 C31_4 C32_4 -8(5) . . . . ?
C25_4 C30_4 C31_4 C32_4 168(3) . . . . ?
C29_4 C30_4 C31_4 C36_4 176(3) . . . . ?
C25_4 C30_4 C31_4 C36_4 -8(4) . . . . ?
C36_4 C31_4 C32_4 C33_4 3(5) . . . . ?
C30_4 C31_4 C32_4 C33_4 -173(3) . . . . ?
C31_4 C32_4 C33_4 C34_4 0(5) . . . . ?
C32_4 C33_4 C34_4 C35_4 -1(5) . . . . ?
C33_4 C34_4 C35_4 C36_4 -3(5) . . . . ?
C34_4 C35_4 C36_4 C31_4 6(4) . . . . ?
C34_4 C35_4 C36_4 C37_4 -177(3) . . . . ?
C32_4 C31_4 C36_4 C35_4 -7(4) . . . . ?
C30_4 C31_4 C36_4 C35_4 169(3) . . . . ?
C32_4 C31_4 C36_4 C37_4 176(3) . . . . ?
C30_4 C31_4 C36_4 C37_4 -8(4) . . . . ?
C5_4 C4_4 C37_4 C24_4 17(4) . . . . ?
C3_4 C4_4 C37_4 C24_4 -169(3) . . . . ?
C5_4 C4_4 C37_4 C36_4 -161(3) . . . . ?
C3_4 C4_4 C37_4 C36_4 13(5) . . . . ?
C23_4 C24_4 C37_4 C4_4 -10(4) . . . . ?
C25_4 C24_4 C37_4 C4_4 168(2) . . . . ?
C23_4 C24_4 C37_4 C36_4 168(3) . . . . ?
C25_4 C24_4 C37_4 C36_4 -14(4) . . . . ?
C35_4 C36_4 C37_4 C4_4 20(4) . . . . ?
C31_4 C36_4 C37_4 C4_4 -163(3) . . . . ?
C35_4 C36_4 C37_4 C24_4 -158(3) . . . . ?
C31_4 C36_4 C37_4 C24_4 19(4) . . . . ?
C7_4 C6_4 C38_4 C39_4 -101(3) . . . . ?
C2_4 C6_4 C38_4 C39_4 74(4) . . . . ?
C6_4 C38_4 C39_4 C40_4 60(4) . . . . ?
C38_4 C39_4 C40_4 Cl1_4 60(4) . . . . ?
C23_4 C22_4 C41_4 C42A_4 -65(5) . . . . ?
C5_4 C22_4 C41_4 C42A_4 113(5) . . . . ?
C23_4 C22_4 C41_4 C42C_4 -103(6) . . . . ?
C5_4 C22_4 C41_4 C42C_4 75(6) . . . . ?
C42C_4 C41_4 C42A_4 C43A_4 -80(9) . . . . ?
C22_4 C41_4 C42A_4 C43A_4 -176(5) . . . . ?
C41_4 C42A_4 C43A_4 Cl2A_4 76(7) . . . . ?
C42A_4 C41_4 C42C_4 C43C_4 82(9) . . . . ?
C22_4 C41_4 C42C_4 C43C_4 -179(6) . . . . ?
C41_4 C42C_4 C43C_4 Cl2C_4 -100(8) . . . . ?
O1_5 C1_5 C2_5 C6_5 2(5) . . . . ?
C5_5 C1_5 C2_5 C6_5 179(3) . . . . ?
O1_5 C1_5 C2_5 C3_5 -172(3) . . . . ?
C5_5 C1_5 C2_5 C3_5 5(3) . . . . ?
C6_5 C2_5 C3_5 C21_5 -9(4) . . . . ?
C1_5 C2_5 C3_5 C21_5 165(3) . . . . ?
C6_5 C2_5 C3_5 C4_5 174(3) . . . . ?
C1_5 C2_5 C3_5 C4_5 -12(3) . . . . ?
C21_5 C3_5 C4_5 C5_5 -162(3) . . . . ?
C2_5 C3_5 C4_5 C5_5 14(3) . . . . ?
C21_5 C3_5 C4_5 C37_5 21(5) . . . . ?
C2_5 C3_5 C4_5 C37_5 -163(3) . . . . ?
C37_5 C4_5 C5_5 C22_5 -8(4) . . . . ?
C3_5 C4_5 C5_5 C22_5 174(3) . . . . ?
C37_5 C4_5 C5_5 C1_5 167(3) . . . . ?
C3_5 C4_5 C5_5 C1_5 -11(3) . . . . ?
O1_5 C1_5 C5_5 C22_5 -4(5) . . . . ?
C2_5 C1_5 C5_5 C22_5 178(3) . . . . ?
O1_5 C1_5 C5_5 C4_5 -179(3) . . . . ?
C2_5 C1_5 C5_5 C4_5 4(3) . . . . ?
C3_5 C2_5 C6_5 C7_5 -4(4) . . . . ?
C1_5 C2_5 C6_5 C7_5 -176(3) . . . . ?
C3_5 C2_5 C6_5 C38_5 179(3) . . . . ?
C1_5 C2_5 C6_5 C38_5 6(5) . . . . ?
C2_5 C6_5 C7_5 C8_5 7(5) . . . . ?
C38_5 C6_5 C7_5 C8_5 -175(3) . . . . ?
C6_5 C7_5 C8_5 C21_5 1(4) . . . . ?
C6_5 C7_5 C8_5 C9_5 -174(3) . . . . ?
C7_5 C8_5 C9_5 C10_5 6(4) . . . . ?
C21_5 C8_5 C9_5 C10_5 -170(3) . . . . ?
C7_5 C8_5 C9_5 C14_5 -179(3) . . . . ?
C21_5 C8_5 C9_5 C14_5 5(4) . . . . ?
C14_5 C9_5 C10_5 C11_5 -5(5) . . . . ?
C8_5 C9_5 C10_5 C11_5 171(3) . . . . ?
C9_5 C10_5 C11_5 C12_5 0(5) . . . . ?
C10_5 C11_5 C12_5 C13_5 4(6) . . . . ?
C11_5 C12_5 C13_5 C14_5 -2(6) . . . . ?
C10_5 C9_5 C14_5 C13_5 6(4) . . . . ?
C8_5 C9_5 C14_5 C13_5 -170(3) . . . . ?
C10_5 C9_5 C14_5 C15_5 -173(3) . . . . ?
C8_5 C9_5 C14_5 C15_5 11(4) . . . . ?
C12_5 C13_5 C14_5 C9_5 -2(5) . . . . ?
C12_5 C13_5 C14_5 C15_5 176(3) . . . . ?
C9_5 C14_5 C15_5 C20_5 -13(4) . . . . ?
C13_5 C14_5 C15_5 C20_5 168(3) . . . . ?
C9_5 C14_5 C15_5 C16_5 164(3) . . . . ?
C13_5 C14_5 C15_5 C16_5 -15(5) . . . . ?
C20_5 C15_5 C16_5 C17_5 1(5) . . . . ?
C14_5 C15_5 C16_5 C17_5 -177(3) . . . . ?
C15_5 C16_5 C17_5 C18_5 1(5) . . . . ?
C16_5 C17_5 C18_5 C19_5 -1(5) . . . . ?
C17_5 C18_5 C19_5 C20_5 -1(5) . . . . ?
C16_5 C15_5 C20_5 C19_5 -3(4) . . . . ?
C14_5 C15_5 C20_5 C19_5 174(3) . . . . ?
C16_5 C15_5 C20_5 C21_5 -180(3) . . . . ?
C14_5 C15_5 C20_5 C21_5 -2(4) . . . . ?
C18_5 C19_5 C20_5 C15_5 3(4) . . . . ?
C18_5 C19_5 C20_5 C21_5 -180(3) . . . . ?
C2_5 C3_5 C21_5 C8_5 17(4) . . . . ?
C4_5 C3_5 C21_5 C8_5 -167(3) . . . . ?
C2_5 C3_5 C21_5 C20_5 -160(3) . . . . ?
C4_5 C3_5 C21_5 C20_5 16(5) . . . . ?
C7_5 C8_5 C21_5 C3_5 -13(4) . . . . ?
C9_5 C8_5 C21_5 C3_5 162(3) . . . . ?
C7_5 C8_5 C21_5 C20_5 164(3) . . . . ?
C9_5 C8_5 C21_5 C20_5 -21(4) . . . . ?
C15_5 C20_5 C21_5 C3_5 -164(3) . . . . ?
C19_5 C20_5 C21_5 C3_5 20(4) . . . . ?
C15_5 C20_5 C21_5 C8_5 19(4) . . . . ?
C19_5 C20_5 C21_5 C8_5 -157(3) . . . . ?
C4_5 C5_5 C22_5 C23_5 -4(4) . . . . ?
C1_5 C5_5 C22_5 C23_5 -177(3) . . . . ?
C4_5 C5_5 C22_5 C41_5 -178(3) . . . . ?
C1_5 C5_5 C22_5 C41_5 8(5) . . . . ?
C5_5 C22_5 C23_5 C24_5 7(4) . . . . ?
C41_5 C22_5 C23_5 C24_5 -179(3) . . . . ?
C22_5 C23_5 C24_5 C37_5 3(4) . . . . ?
C22_5 C23_5 C24_5 C25_5 -175(3) . . . . ?
C23_5 C24_5 C25_5 C26_5 14(4) . . . . ?
C37_5 C24_5 C25_5 C26_5 -164(3) . . . . ?
C23_5 C24_5 C25_5 C30_5 -171(3) . . . . ?
C37_5 C24_5 C25_5 C30_5 12(4) . . . . ?
C30_5 C25_5 C26_5 C27_5 0(5) . . . . ?
C24_5 C25_5 C26_5 C27_5 176(3) . . . . ?
C25_5 C26_5 C27_5 C28_5 0(5) . . . . ?
C26_5 C27_5 C28_5 C29_5 0(5) . . . . ?
C27_5 C28_5 C29_5 C30_5 0(5) . . . . ?
C28_5 C29_5 C30_5 C25_5 0(5) . . . . ?
C28_5 C29_5 C30_5 C31_5 -179(3) . . . . ?
C26_5 C25_5 C30_5 C29_5 0(4) . . . . ?
C24_5 C25_5 C30_5 C29_5 -176(3) . . . . ?
C26_5 C25_5 C30_5 C31_5 179(3) . . . . ?
C24_5 C25_5 C30_5 C31_5 3(4) . . . . ?
C29_5 C30_5 C31_5 C32_5 -9(4) . . . . ?
C25_5 C30_5 C31_5 C32_5 171(3) . . . . ?
C29_5 C30_5 C31_5 C36_5 170(3) . . . . ?
C25_5 C30_5 C31_5 C36_5 -9(4) . . . . ?
C36_5 C31_5 C32_5 C33_5 0(4) . . . . ?
C30_5 C31_5 C32_5 C33_5 179(3) . . . . ?
C31_5 C32_5 C33_5 C34_5 3(5) . . . . ?
C32_5 C33_5 C34_5 C35_5 -2(5) . . . . ?
C33_5 C34_5 C35_5 C36_5 -3(4) . . . . ?
C34_5 C35_5 C36_5 C31_5 6(4) . . . . ?
C34_5 C35_5 C36_5 C37_5 -178(3) . . . . ?
C32_5 C31_5 C36_5 C35_5 -4(4) . . . . ?
C30_5 C31_5 C36_5 C35_5 176(3) . . . . ?
C32_5 C31_5 C36_5 C37_5 179(3) . . . . ?
C30_5 C31_5 C36_5 C37_5 0(4) . . . . ?
C23_5 C24_5 C37_5 C4_5 -14(4) . . . . ?
C25_5 C24_5 C37_5 C4_5 163(3) . . . . ?
C23_5 C24_5 C37_5 C36_5 162(3) . . . . ?
C25_5 C24_5 C37_5 C36_5 -21(4) . . . . ?
C5_5 C4_5 C37_5 C24_5 16(4) . . . . ?
C3_5 C4_5 C37_5 C24_5 -167(3) . . . . ?
C5_5 C4_5 C37_5 C36_5 -159(3) . . . . ?
C3_5 C4_5 C37_5 C36_5 18(5) . . . . ?
C35_5 C36_5 C37_5 C24_5 -161(3) . . . . ?
C31_5 C36_5 C37_5 C24_5 15(4) . . . . ?
C35_5 C36_5 C37_5 C4_5 15(4) . . . . ?
C31_5 C36_5 C37_5 C4_5 -169(3) . . . . ?
C7_5 C6_5 C38_5 C39A_5 -110(5) . . . . ?
C2_5 C6_5 C38_5 C39A_5 67(6) . . . . ?
C7_5 C6_5 C38_5 C39B_5 -96(7) . . . . ?
C2_5 C6_5 C38_5 C39B_5 82(7) . . . . ?
C6_5 C38_5 C39A_5 C40A_5 76(7) . . . . ?
C39B_5 C38_5 C39A_5 C40A_5 43(13) . . . . ?
C38_5 C39A_5 C40A_5 Cl1A_5 176(5) . . . . ?
C39A_5 C38_5 C39B_5 C40B_5 -24(11) . . . . ?
C6_5 C38_5 C39B_5 C40B_5 -177(10) . . . . ?
C38_5 C39B_5 C40B_5 Cl1B_5 -178(9) . . . . ?
C23_5 C22_5 C41_5 C42_5 -99(3) . . . . ?
C5_5 C22_5 C41_5 C42_5 75(4) . . . . ?
C22_5 C41_5 C42_5 C43_5 56(4) . . . . ?
C41_5 C42_5 C43_5 Cl2_5 61(3) . . . . ?
O1_6 C1_6 C2_6 C6_6 2(5) . . . . ?
C5_6 C1_6 C2_6 C6_6 180(3) . . . . ?
O1_6 C1_6 C2_6 C3_6 -173(3) . . . . ?
C5_6 C1_6 C2_6 C3_6 5(3) . . . . ?
C6_6 C2_6 C3_6 C21_6 -9(4) . . . . ?
C1_6 C2_6 C3_6 C21_6 166(2) . . . . ?
C6_6 C2_6 C3_6 C4_6 173(3) . . . . ?
C1_6 C2_6 C3_6 C4_6 -11(3) . . . . ?
C2_6 C3_6 C4_6 C5_6 14(3) . . . . ?
C21_6 C3_6 C4_6 C5_6 -163(3) . . . . ?
C2_6 C3_6 C4_6 C37_6 -162(3) . . . . ?
C21_6 C3_6 C4_6 C37_6 21(6) . . . . ?
C37_6 C4_6 C5_6 C22_6 -9(4) . . . . ?
C3_6 C4_6 C5_6 C22_6 174(3) . . . . ?
C37_6 C4_6 C5_6 C1_6 166(3) . . . . ?
C3_6 C4_6 C5_6 C1_6 -11(3) . . . . ?
O1_6 C1_6 C5_6 C22_6 -3(5) . . . . ?
C2_6 C1_6 C5_6 C22_6 179(3) . . . . ?
O1_6 C1_6 C5_6 C4_6 -178(3) . . . . ?
C2_6 C1_6 C5_6 C4_6 4(3) . . . . ?
C3_6 C2_6 C6_6 C7_6 -1(4) . . . . ?
C1_6 C2_6 C6_6 C7_6 -176(3) . . . . ?
C3_6 C2_6 C6_6 C38_6 -178(3) . . . . ?
C1_6 C2_6 C6_6 C38_6 8(5) . . . . ?
C2_6 C6_6 C7_6 C8_6 4(5) . . . . ?
C38_6 C6_6 C7_6 C8_6 -179(3) . . . . ?
C6_6 C7_6 C8_6 C21_6 3(4) . . . . ?
C6_6 C7_6 C8_6 C9_6 -174(3) . . . . ?
C7_6 C8_6 C9_6 C10_6 8(4) . . . . ?
C21_6 C8_6 C9_6 C10_6 -169(3) . . . . ?
C7_6 C8_6 C9_6 C14_6 -180(3) . . . . ?
C21_6 C8_6 C9_6 C14_6 3(4) . . . . ?
C14_6 C9_6 C10_6 C11_6 -3(5) . . . . ?
C8_6 C9_6 C10_6 C11_6 170(3) . . . . ?
C9_6 C10_6 C11_6 C12_6 -1(5) . . . . ?
C10_6 C11_6 C12_6 C13_6 3(5) . . . . ?
C11_6 C12_6 C13_6 C14_6 -2(6) . . . . ?
C12_6 C13_6 C14_6 C9_6 -1(5) . . . . ?
C12_6 C13_6 C14_6 C15_6 176(3) . . . . ?
C10_6 C9_6 C14_6 C13_6 4(4) . . . . ?
C8_6 C9_6 C14_6 C13_6 -169(3) . . . . ?
C10_6 C9_6 C14_6 C15_6 -174(3) . . . . ?
C8_6 C9_6 C14_6 C15_6 13(4) . . . . ?
C13_6 C14_6 C15_6 C16_6 -15(5) . . . . ?
C9_6 C14_6 C15_6 C16_6 163(3) . . . . ?
C13_6 C14_6 C15_6 C20_6 168(3) . . . . ?
C9_6 C14_6 C15_6 C20_6 -14(4) . . . . ?
C20_6 C15_6 C16_6 C17_6 0(5) . . . . ?
C14_6 C15_6 C16_6 C17_6 -176(3) . . . . ?
C15_6 C16_6 C17_6 C18_6 1(5) . . . . ?
C16_6 C17_6 C18_6 C19_6 0(5) . . . . ?
C17_6 C18_6 C19_6 C20_6 -3(5) . . . . ?
C18_6 C19_6 C20_6 C15_6 5(4) . . . . ?
C18_6 C19_6 C20_6 C21_6 -180(3) . . . . ?
C16_6 C15_6 C20_6 C19_6 -3(4) . . . . ?
C14_6 C15_6 C20_6 C19_6 174(3) . . . . ?
C16_6 C15_6 C20_6 C21_6 -179(3) . . . . ?
C14_6 C15_6 C20_6 C21_6 -2(4) . . . . ?
C2_6 C3_6 C21_6 C8_6 16(4) . . . . ?
C4_6 C3_6 C21_6 C8_6 -167(3) . . . . ?
C2_6 C3_6 C21_6 C20_6 -161(3) . . . . ?
C4_6 C3_6 C21_6 C20_6 16(5) . . . . ?
C7_6 C8_6 C21_6 C3_6 -14(4) . . . . ?
C9_6 C8_6 C21_6 C3_6 164(3) . . . . ?
C7_6 C8_6 C21_6 C20_6 164(3) . . . . ?
C9_6 C8_6 C21_6 C20_6 -19(4) . . . . ?
C19_6 C20_6 C21_6 C3_6 20(4) . . . . ?
C15_6 C20_6 C21_6 C3_6 -164(3) . . . . ?
C19_6 C20_6 C21_6 C8_6 -157(3) . . . . ?
C15_6 C20_6 C21_6 C8_6 18(4) . . . . ?
C4_6 C5_6 C22_6 C23_6 -4(4) . . . . ?
C1_6 C5_6 C22_6 C23_6 -178(3) . . . . ?
C4_6 C5_6 C22_6 C41_6 -179(3) . . . . ?
C1_6 C5_6 C22_6 C41_6 7(5) . . . . ?
C5_6 C22_6 C23_6 C24_6 7(4) . . . . ?
C41_6 C22_6 C23_6 C24_6 -178(3) . . . . ?
C22_6 C23_6 C24_6 C37_6 3(4) . . . . ?
C22_6 C23_6 C24_6 C25_6 -174(3) . . . . ?
C23_6 C24_6 C25_6 C26_6 14(4) . . . . ?
C37_6 C24_6 C25_6 C26_6 -163(3) . . . . ?
C23_6 C24_6 C25_6 C30_6 -171(3) . . . . ?
C37_6 C24_6 C25_6 C30_6 12(4) . . . . ?
C30_6 C25_6 C26_6 C27_6 0(5) . . . . ?
C24_6 C25_6 C26_6 C27_6 175(3) . . . . ?
C25_6 C26_6 C27_6 C28_6 0(5) . . . . ?
C26_6 C27_6 C28_6 C29_6 0(5) . . . . ?
C27_6 C28_6 C29_6 C30_6 0(5) . . . . ?
C28_6 C29_6 C30_6 C25_6 0(5) . . . . ?
C28_6 C29_6 C30_6 C31_6 -179(3) . . . . ?
C26_6 C25_6 C30_6 C29_6 0(4) . . . . ?
C24_6 C25_6 C30_6 C29_6 -175(3) . . . . ?
C26_6 C25_6 C30_6 C31_6 180(3) . . . . ?
C24_6 C25_6 C30_6 C31_6 4(4) . . . . ?
C29_6 C30_6 C31_6 C36_6 169(3) . . . . ?
C25_6 C30_6 C31_6 C36_6 -10(4) . . . . ?
C29_6 C30_6 C31_6 C32_6 -12(4) . . . . ?
C25_6 C30_6 C31_6 C32_6 168(3) . . . . ?
C36_6 C31_6 C32_6 C33_6 -1(4) . . . . ?
C30_6 C31_6 C32_6 C33_6 -180(3) . . . . ?
C31_6 C32_6 C33_6 C34_6 4(5) . . . . ?
C32_6 C33_6 C34_6 C35_6 -2(5) . . . . ?
C33_6 C34_6 C35_6 C36_6 -2(4) . . . . ?
C34_6 C35_6 C36_6 C31_6 5(4) . . . . ?
C34_6 C35_6 C36_6 C37_6 -179(3) . . . . ?
C32_6 C31_6 C36_6 C35_6 -3(4) . . . . ?
C30_6 C31_6 C36_6 C35_6 176(3) . . . . ?
C32_6 C31_6 C36_6 C37_6 -179(2) . . . . ?
C30_6 C31_6 C36_6 C37_6 -1(4) . . . . ?
C5_6 C4_6 C37_6 C24_6 18(4) . . . . ?
C3_6 C4_6 C37_6 C24_6 -166(3) . . . . ?
C5_6 C4_6 C37_6 C36_6 -157(3) . . . . ?
C3_6 C4_6 C37_6 C36_6 19(5) . . . . ?
C23_6 C24_6 C37_6 C4_6 -15(4) . . . . ?
C25_6 C24_6 C37_6 C4_6 162(3) . . . . ?
C23_6 C24_6 C37_6 C36_6 160(3) . . . . ?
C25_6 C24_6 C37_6 C36_6 -22(4) . . . . ?
C35_6 C36_6 C37_6 C4_6 16(4) . . . . ?
C31_6 C36_6 C37_6 C4_6 -168(3) . . . . ?
C35_6 C36_6 C37_6 C24_6 -159(3) . . . . ?
C31_6 C36_6 C37_6 C24_6 17(4) . . . . ?
C7_6 C6_6 C38_6 C39_6 -102(4) . . . . ?
C2_6 C6_6 C38_6 C39_6 75(5) . . . . ?
C6_6 C38_6 C39_6 C40_6 177(4) . . . . ?
C38_6 C39_6 C40_6 Cl1A_6 178(4) . . . . ?
C38_6 C39_6 C40_6 Cl1B_6 -145(6) . . . . ?
C23_6 C22_6 C41_6 C42_6 -99(3) . . . . ?
C5_6 C22_6 C41_6 C42_6 76(4) . . . . ?
C22_6 C41_6 C42_6 C43_6 53(4) . . . . ?
C41_6 C42_6 C43_6 Cl2_6 61(3) . . . . ?
 
_diffrn_measured_fraction_theta_max    0.983
_diffrn_reflns_theta_full              68.24
_diffrn_measured_fraction_theta_full   0.983
_refine_diff_density_max    0.333
_refine_diff_density_min   -0.355
_refine_diff_density_rms    0.061
